# Supplementary material
Source: MDPI journal article supplement (https://www.mdpi.com/2073-8994/15/7/1382)
Supplement: s1 [file s1]

# **Reaction of Triazolic Aldehydes with Diisopropyl Zinc: Chirality Dissipation versus Amplification**

Oleg A. Mikhaylov <sup>1</sup>, Elena Sh. Saigitbatalova <sup>2</sup>, Liliya Z. Latypova <sup>2</sup>, Almira R. Kurbangalieva <sup>2,\*</sup> and Ilya D. Gridnev <sup>1,\*</sup>

<sup>1</sup> N. D. Zelinsky Institute of Organic Chemistry, Leninsky prosp. 47, Moscow 119991 Russia

<sup>2</sup> Biofunctional Chemistry Laboratory, A. Butlerov Institute of Chemistry, Kazan Federal University, 18 Kremlyovskaya Street, Kazan 420008, Russia

\* Correspondence: akurbang@kpfu.ru (A.R.K); ilyaiochem@gmail.com (I.D.G.)

## Content

|                                      |     |
|--------------------------------------|-----|
| 1. Materials and Methods .....       | 3   |
| 1.1. General Information.....        | 3   |
| 1.2. Chemical Synthesis .....        | 3   |
| 2. Experimental section .....        | 4   |
| 3. NMR Spectra of alcohols 4-6.....  | 6   |
| 4. HRMS data of alcohols 4-6 .....   | 9   |
| 5. HPLS data for alcohols 4-6 .....  | 12  |
| 6. Computational details .....       | 18  |
| 3 .....                              | 20  |
| Zn( <i>i</i> -Pr) <sub>2</sub> ..... | 21  |
| 7 .....                              | 22  |
| 9 .....                              | 24  |
| 10 .....                             | 26  |
| TS1(S) .....                         | 29  |
| 7(S)·7(S) .....                      | 32  |
| TS1(R) .....                         | 35  |
| 7(S)·7(R).....                       | 38  |
| 8(SS).....                           | 41  |
| 8(RS) .....                          | 44  |
| 11 .....                             | 47  |
| 12 .....                             | 50  |
| TS2(S) .....                         | 54  |
| 8(SS)·7(S) .....                     | 58  |
| TS2(R) .....                         | 62  |
| 8(SS)·7(R).....                      | 66  |
| 13(SSSS).....                        | 68  |
| 14(SSSS).....                        | 73  |
| 15(SSSS)s .....                      | 78  |
| TS3(S) .....                         | 84  |
| 13(SSSS)·7(S) .....                  | 90  |
| 15(SSSS)r .....                      | 96  |
| TS3(R) .....                         | 102 |
| 13(SSSS)·7(R).....                   | 106 |

## 1. Materials and Methods

### 1.1. General Information

Diisopropylzinc 1M solution in toluene (Sigma-Aldrich) was used as received without further purification. All solvents were purified and distilled using standard procedures. Analytical thin layer chromatography (TLC) was carried out on Sorbfil PTLC-AF-A-UF plates using acetone-chloroform (1:4) as the eluent and UV light (254 nm) as the visualizing agent. Silica gel 60A (Acros Organics, 400–230 mesh, 0.040–0.063 mm) was used for open-column chromatography. Melting points were recorded with a Boëtius melting point instrument and are uncorrected. NMR spectra were measured on a Bruker Avance 300 spectrometer at 300.13 MHz ( $^1\text{H}$ ) and 75.47 MHz ( $^{13}\text{C}$ ), Bruker Avance 600 spectrometer at 600.13 MHz ( $^1\text{H}$ ) and 150.90 MHz ( $^{13}\text{C}$ ) at 20 °C in the deuterated chloroform. The chemical shifts ( $\delta$ ) are expressed in parts per million (ppm) and are calibrated using residual undeuterated solvent peak as an internal reference ( $\text{CDCl}_3$ :  $\delta_{\text{H}}$  7.26,  $\delta_{\text{C}}$  77.16). All coupling constants ( $J$ ) are reported in Hertz (Hz), and multiplicities are indicated as follows: s (singlet), d (doublet) and m (multiplet). High-resolution mass spectra (HRMS) were obtained through electrospray ionization (ESI) with positive (+) ion detection on a Bruker micrOTOF–QIII quadrupole time-of-flight mass spectrometer. The *ee* measurements were performed via HPLC analysis. HPLC analysis was performed on an HPLC system equipped with chiral stationary phase columns (AD-H, AS-H, OD-H, OJ-H), detection at 220 or 254 nm.

### 1.2. Chemical Synthesis.

1-Benzyl-1*H*-1,2,3-triazole-4-carbaldehyde (**1**) [1], 1-phenyl-1*H*-1,2,3-triazole-4-carboxaldehyde (**2**) and 1-(4-chlorophenyl)-1*H*-1,2,3-triazole-4-carboxaldehyde (**3**) [2] were synthesized according to the known methods. All reactions were carried out using standard Schlenk techniques under argon atmosphere.

1. Song, H.; Rogers, N.J.; Brabec, V.; Clarkson, G.J.; Coverdale, J.P.C.; Kostrhunova, H.; Phillips, R.M.; Postings, M.; Shepherd, S.L.; Scott P. Triazole-based, optically-pure metallocsupramolecules; highly potent and selective anticancer compounds. *Chem. Commun.* **2020**, 56, 6392–6395.
2. Dai, Z.C.; Chen, Y.F.; Zhang, M.; Li, S.K. Yang, T.-T.; Shen, L.; Wang, J.X.; Qian, S.S.; Zhu, H.L.; Ye, Y.H. Synthesis and antifungal activity of 1,2,3-triazole phenylhydrazone derivatives. *Org. Biomol. Chem.* **2015**, 13, 477–486.

## 2. Experimental section

### General procedure for the alkylation reaction of triazolyl carbaldehydes using diisopropylzinc

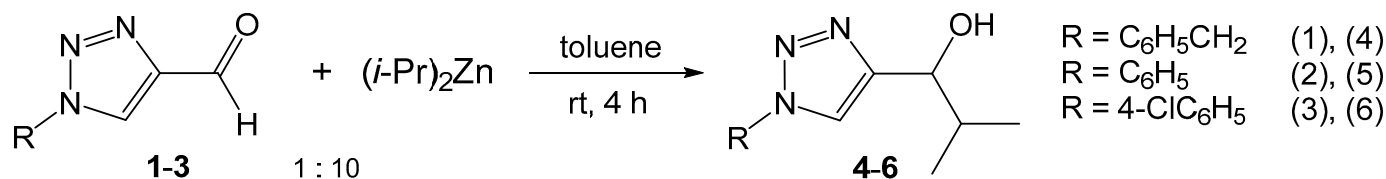

To the solution of aldehyde (0.50 mmol) in dry toluene (5 mL) with intense stirring was added dropwise the solution of  $(i\text{Pr})_2\text{Zn}$  (1M, 5 mL) *via* syringe under argon atmosphere. The reaction mixture was stirred for 4 hours at room temperature and was then quenched with aqueous HCl solution (0.1 M, 10 mL). After stirring for 15 minutes the reaction mixture was neutralized with saturated solution of  $\text{NaHCO}_3$  (15 mL). The organic phase was separated and the colorless aqueous layer was extracted with  $\text{CHCl}_3$  ( $3 \times 10$  mL). The solvent from the combined organic layers was removed *in vacuo*. The remaining yellow solid was purified by column chromatography (eluent acetone – chloroform, 1 : 4) to yield the corresponding alcohol. Samples were analyzed by chiral HPLC in order to determine *ee*.

**1-(1-Benzyl-1H-1,2,3-triazol-4-yl)-2-methylpropan-1-ol (4):** colorless crystals, 0.049 g (42% yield); mp 84 °C;  $R_f$  0.26 (acetone –  $\text{CHCl}_3$ , 1:4);  $^1\text{H}$  NMR ( $\text{CDCl}_3$ , 300 MHz, ppm)  $\delta$  7.42–7.23 (m, 6H, Ar-H,  $\text{H}_{\text{triaz}}$ ), 5.51 (s, 2H), 4.63 (d,  $^3J = 5.9$  Hz, 1H,  $\text{CH-OH}$ ), 2.20–1.97 (m, 1H,  $\text{CH}(i\text{Pr})$ ), 0.95 (d, 3H,  $^3J = 6.8$  Hz,  $\text{CH}_3$ ), 0.91 (d, 3H,  $^3J = 6.8$  Hz,  $\text{CH}_3$ );  $^{13}\text{C}$   $\{^1\text{H}\}$  NMR ( $\text{CDCl}_3$ , 125 MHz, ppm)  $\delta$  150.79 ( $\text{C}_{\text{triaz}}$ ), 134.80, 129.28, 128.90, 128.15 ( $\text{C}_{\text{Ar}}$ ), 120.81 ( $\text{C-H}_{\text{triaz}}$ ), 72.63 ( $\text{C-OH}$ ), 54.32 ( $\text{CH}_2$ ), 34.35 ( $\text{CH}(i\text{Pr})$ ), 18.70, 17.47 ( $\text{CH}_3$ ); HRMS (ESI)  $m/z$  232.1444 (calcd for  $\text{C}_{13}\text{H}_{18}\text{N}_3\text{O}$ , 232.1444).

**2-Methyl-1-(1-phenyl-1H-1,2,3-triazol-4-yl)propan-1-ol (5):** colorless crystals, 0.052 g (48% yield); mp 107 °C;  $R_f$  = 0.38 (acetone –  $\text{CHCl}_3$ , 1:4);  $^1\text{H}$  NMR ( $\text{CDCl}_3$ , 300 MHz, ppm)  $\delta$  7.91 (s, 1H,  $\text{H}_{\text{triaz}}$ ), 7.79–7.70 (m, 2H, Ar-H), 7.58–7.39 (m, 3H, Ar-H), 4.77 (d,  $^3J = 5.8$  Hz, 1H,  $\text{CH-OH}$ ), 2.34–2.11 (m, 1H,  $\text{CH}(i\text{Pr})$ ), 1.02 (d, 3H,  $^3J = 6.8$  Hz,  $\text{CH}_3$ ), 0.99 (d, 3H,  $^3J = 6.8$  Hz,  $\text{CH}_3$ );  $^{13}\text{C}$   $\{^1\text{H}\}$  NMR ( $\text{CDCl}_3$ , 125 MHz, ppm)  $\delta$  151.10 ( $\text{C}_{\text{triaz}}$ ), 137.27, 129.91, 128.87, 120.65 ( $\text{C}_{\text{Ar}}$ ), 119.20 ( $\text{CH}_{\text{triaz}}$ ), 72.63 ( $\text{C-OH}$ ), 34.38 ( $\text{CH}(i\text{Pr})$ ), 18.72, 17.48 (2 $\text{CH}_3$ ); HRMS (ESI)  $m/z$  218.1287 (calcd for  $\text{C}_{12}\text{H}_{16}\text{N}_3\text{O}$ , 218.1288).

**1-(1-(4-Chlorophenyl)-1H-1,2,3-triazol-4-yl)-2-methylpropan-1-ol (6):** colorless crystals, 0.06 g (48% yield); mp 143 °C;  $R_f$  = 0.38 (acetone –  $\text{CHCl}_3$ , 1:4);  $^1\text{H}$  NMR ( $\text{CDCl}_3$ , 300 MHz, ppm)  $\delta$  7.88 (s, 1H,  $\text{H}_{\text{triaz}}$ ), 7.70, 7.51 (4H, AA'BB',  $^3J_{\text{AB}} = ^3J_{\text{A'B'}} = 8.6$  Hz,  $^4J_{\text{AA'}} = ^4J_{\text{BB'}} = 2.5$  Hz,  $^5J_{\text{AB'}} = ^5J_{\text{A'B}} = 0.3$  Hz, Ar-H), 4.77 (d,  $^3J = 5.7$  Hz, 1H,  $\text{CH-OH}$ ), 2.28–2.11 (m, 1H,  $\text{CH}(i\text{Pr})$ ), 1.01 (d, 3H,  $^3J = 7.1$  Hz,  $\text{CH}_3$ ), 0.99 (d, 3H,  $^3J = 7.1$  Hz,  $\text{CH}_3$ );  $^{13}\text{C}$   $\{^1\text{H}\}$  NMR ( $\text{CDCl}_3$ , 125 MHz, ppm)  $\delta$  151.43 ( $\text{C}_{\text{triaz}}$ ), 135.72, 134.63, 130.07, 121.75 ( $\text{C}_{\text{Ar}}$ ), 119.15 ( $\text{CH}_{\text{triaz}}$ ), 72.55 ( $\text{C-OH}$ ), 34.33 ( $\text{CH}(i\text{Pr})$ ), 18.70, 17.43 ( $\text{CH}_3$ ); HRMS (ESI)  $m/z$  252.0898 (calcd for  $\text{C}_{12}\text{H}_{15}\text{ClN}_3\text{O}$  252.0898).

### General procedure for the alkylation reaction of triazolyl carbaldehydes using diisopropylzinc in the presence of chiral catalysts

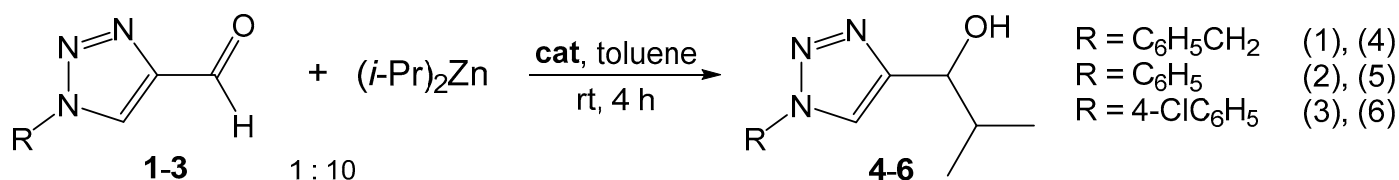

To the solution of chiral catalyst **cat** (0.05 or 0.10 mmol) in dry toluene (5 mL) with intense stirring was added dropwise a solution of  $(i\text{Pr})_2\text{Zn}$  (1M, 5 mL) *via* syringe under argon atmosphere. Obtained mixture was stirred for 15 minutes at room temperature. The aldehyde (0.50 mmol) was dissolved in 5 mL of dry toluene and then was added dropwise to the reaction mixture under argon atmosphere. Reaction times, conditions and yields are given in a Table 1. Work up of the reaction mixture was carried out similarly to the general procedure described above.

### General procedure for the alkylation reaction of triazolyl carbaldehydes using diisopropylzinc in the presence of autocatalyst

To the solution of alcohol (0.09 mmol) in dry toluene (5 mL) with intense stirring was added dropwise the solution of  $(i\text{Pr})_2\text{Zn}$  (1M, 4.5 mL) *via* syringe under argon atmosphere. Obtained mixture was stirred for 15 minutes at the room temperature. The aldehyde (0.45 mmol) was dissolved in 5 mL of dry toluene and then was added dropwise to the reaction mixture under a nitrogen atmosphere. The reaction mixture was stirred overnight at room temperature. Work up of the reaction mixture was carried out similarly to the general procedure described above.

### 3. NMR Spectra of alcohols 4-6

a)

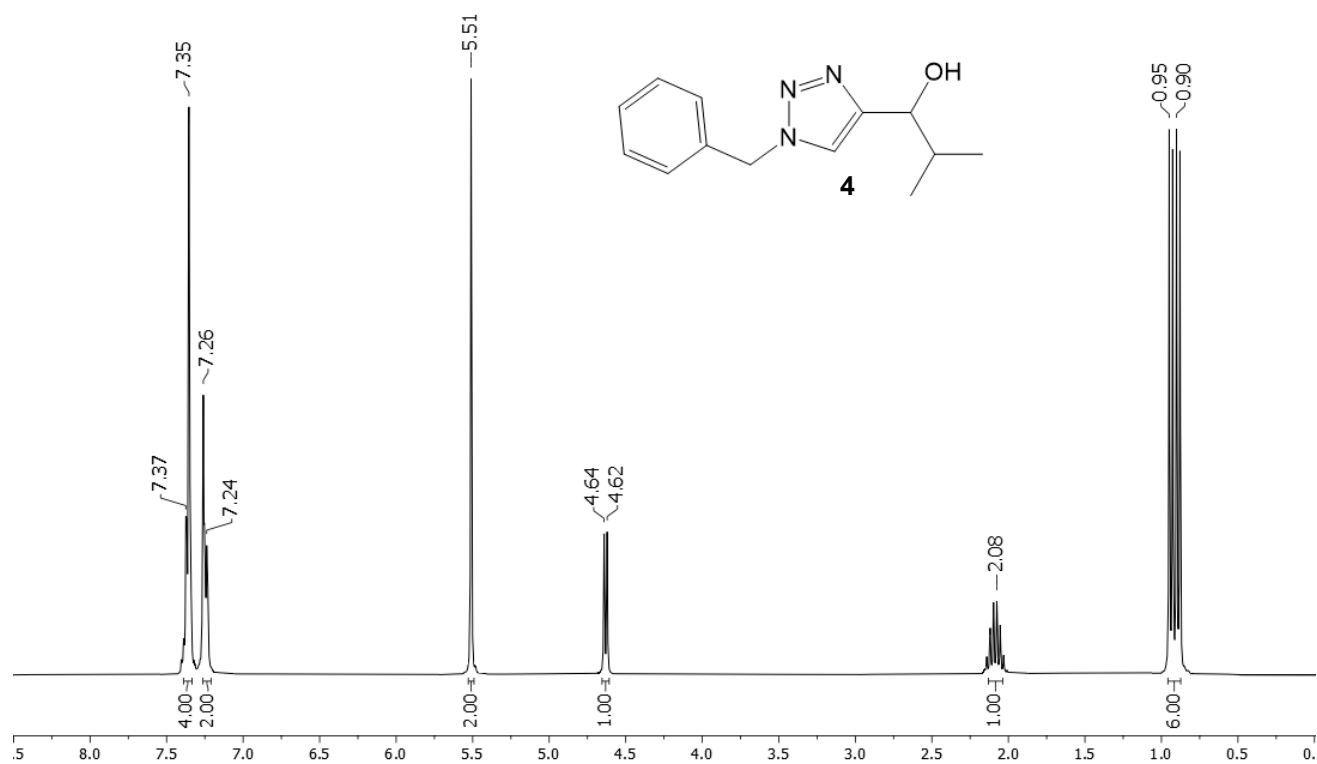

b)

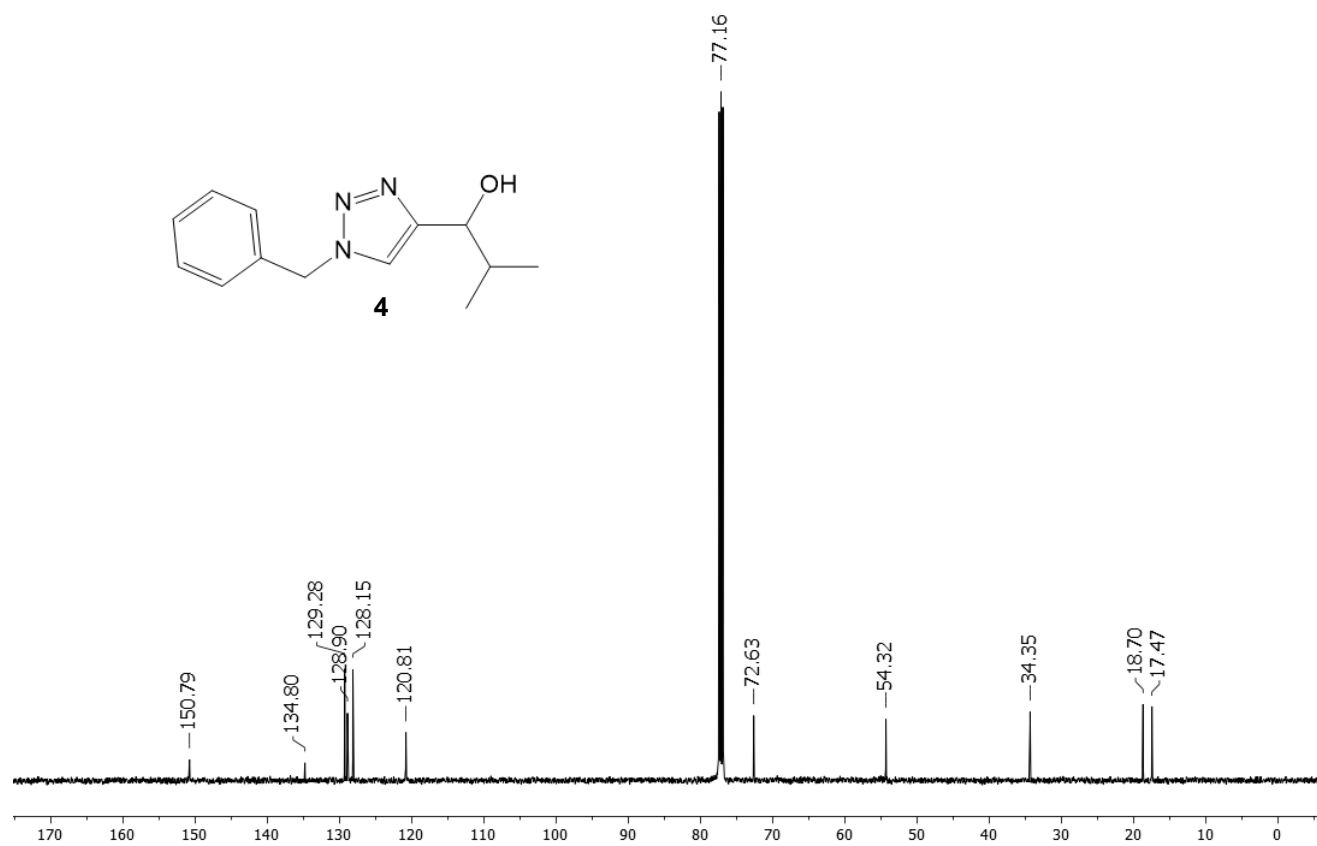

**Figure S1.** <sup>1</sup>H (a) and <sup>13</sup>C{<sup>1</sup>H} (b) NMR spectra of compound **4** (CDCl<sub>3</sub>).

a)

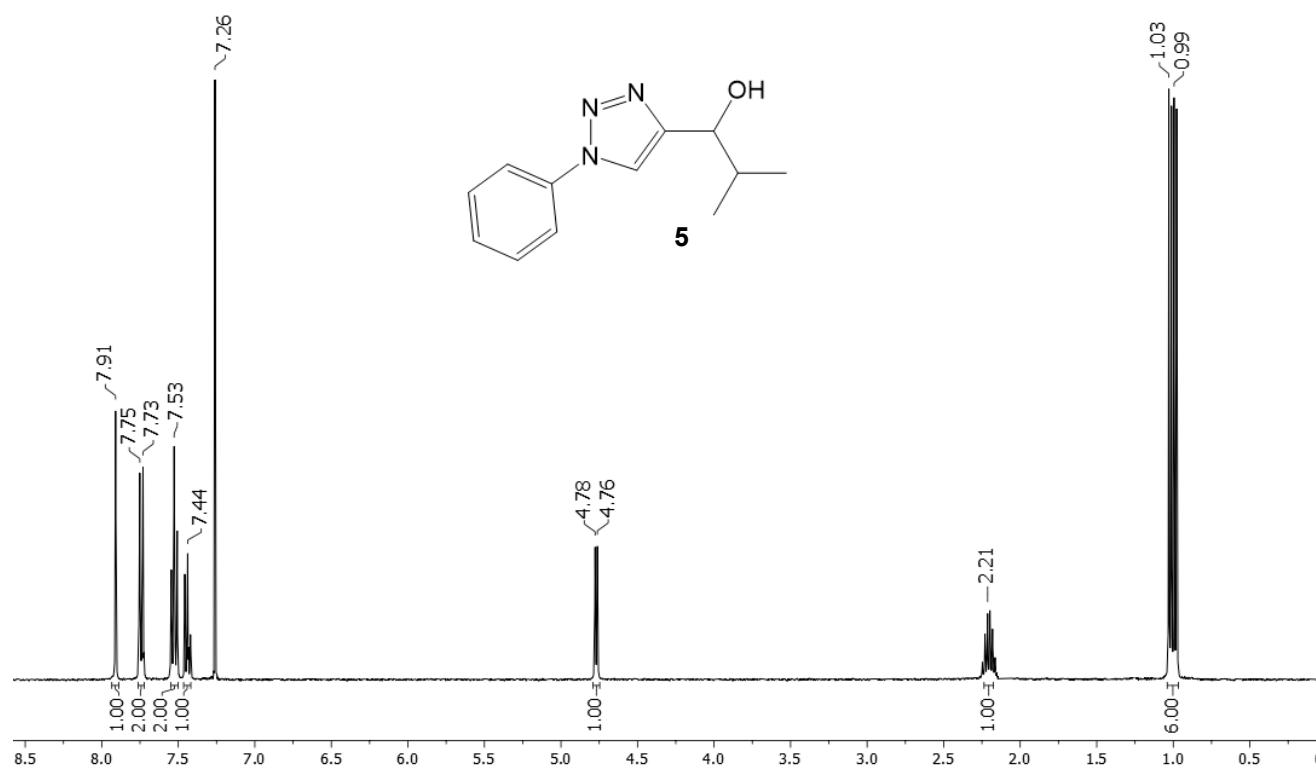

b)

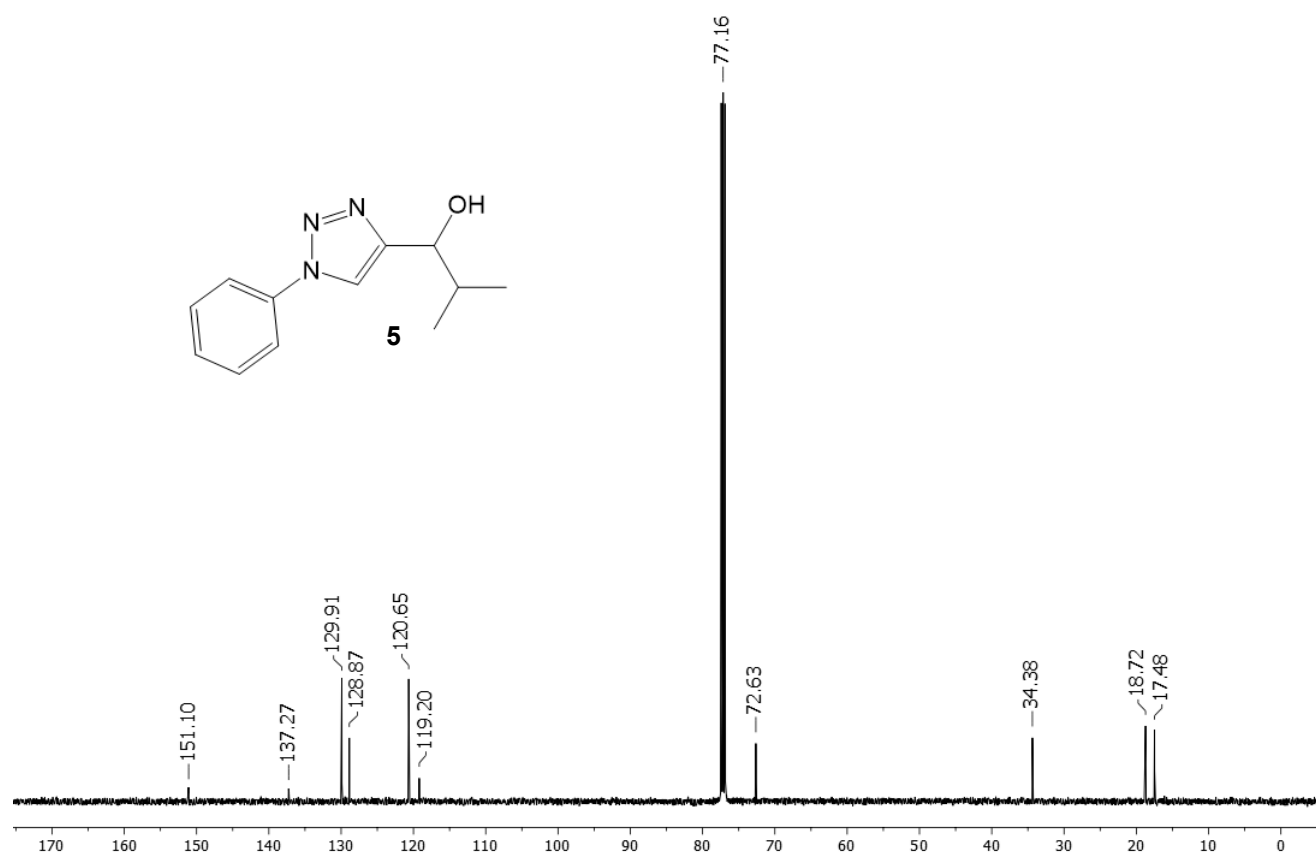

**Figure S2.** <sup>1</sup>H (a) and <sup>13</sup>C{<sup>1</sup>H} (b) NMR spectra of compound 5 (CDCl<sub>3</sub>).

a)

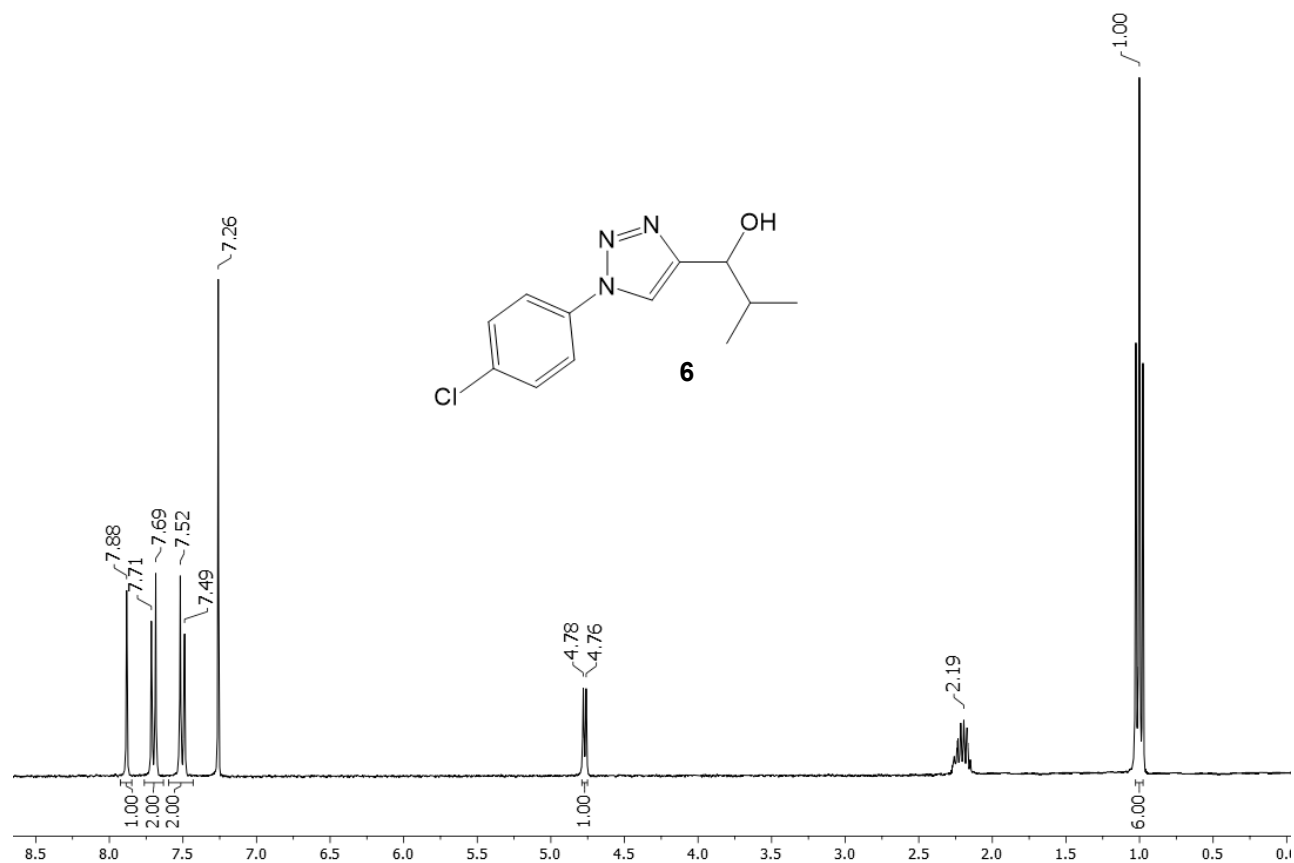

b)

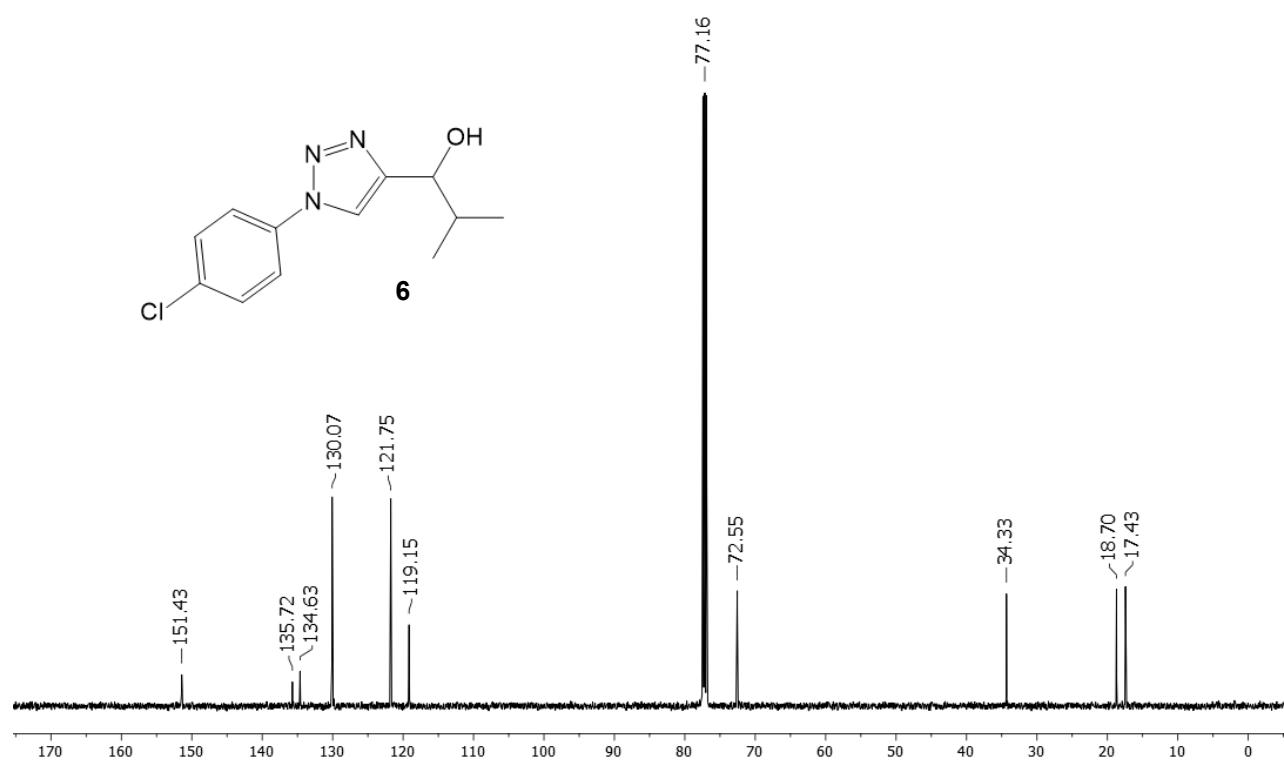

**Figure S3.** <sup>1</sup>H (a) and <sup>13</sup>C{<sup>1</sup>H} (b) NMR spectra of compound **6** (CDCl<sub>3</sub>).



#### 4. HRMS data of alcohols 4-6

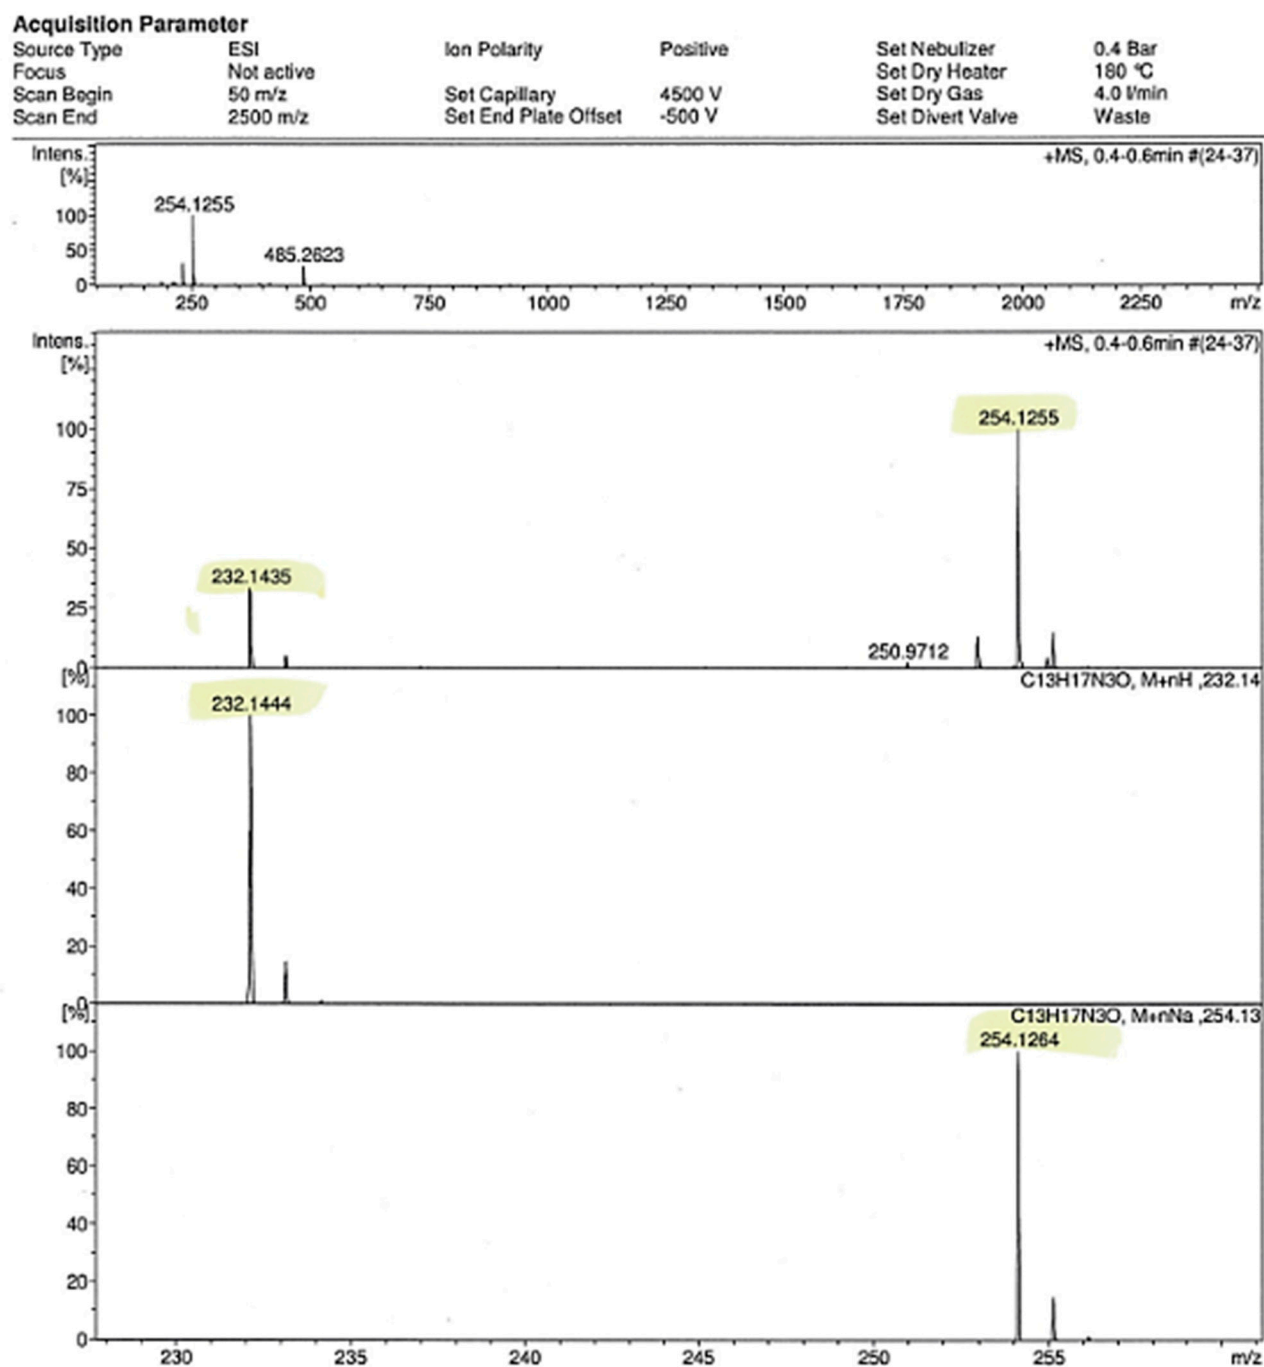

Figure S4. HRMS data of compound 4.

**Acquisition Parameter**

|             |            |                      |          |                  |           |
|-------------|------------|----------------------|----------|------------------|-----------|
| Source Type | ESI        | Ion Polarity         | Positive | Set Nebulizer    | 0.4 Bar   |
| Focus       | Not active |                      |          | Set Dry Heater   | 180 °C    |
| Scan Begin  | 50 m/z     | Set Capillary        | 4500 V   | Set Dry Gas      | 4.0 l/min |
| Scan End    | 2500 m/z   | Set End Plate Offset | -500 V   | Set Divert Valve | Waste     |

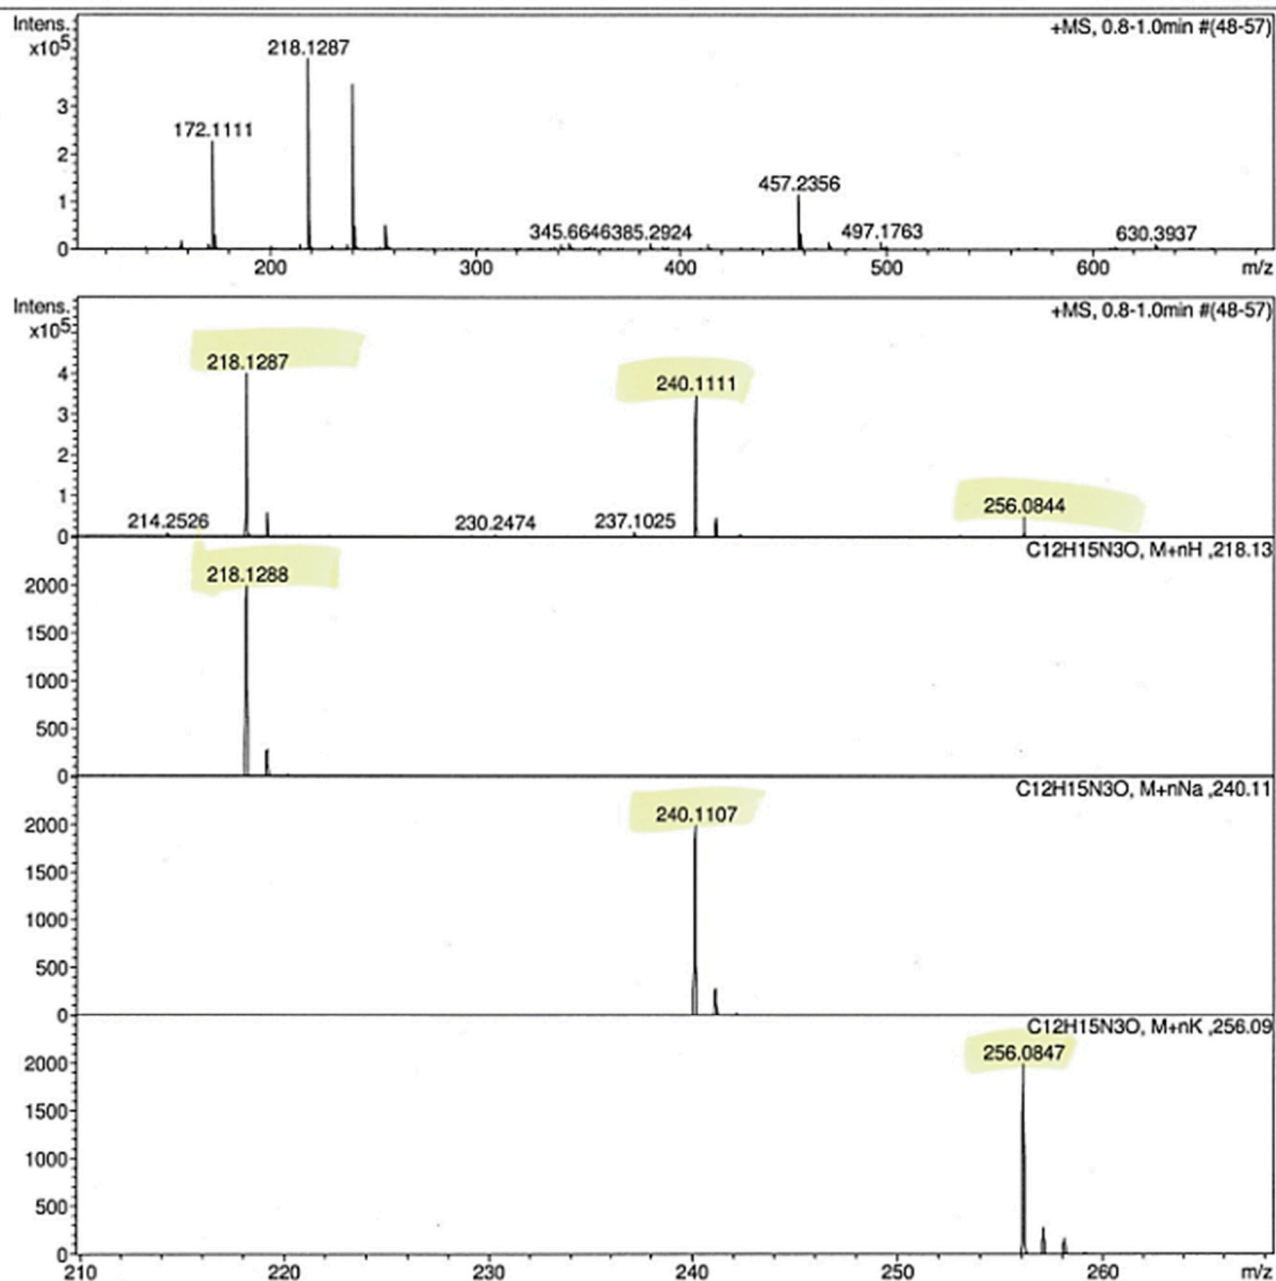

Figure S5. HRMS data of compound 5.

**Acquisition Parameter**

|             |            |                      |          |                  |           |
|-------------|------------|----------------------|----------|------------------|-----------|
| Source Type | ESI        | Ion Polarity         | Positive | Set Nebulizer    | 0.4 Bar   |
| Focus       | Not active |                      |          | Set Dry Heater   | 180 °C    |
| Scan Begin  | 50 m/z     | Set Capillary        | 4500 V   | Set Dry Gas      | 4.0 l/min |
| Scan End    | 2500 m/z   | Set End Plate Offset | -500 V   | Set Divert Valve | Waste     |

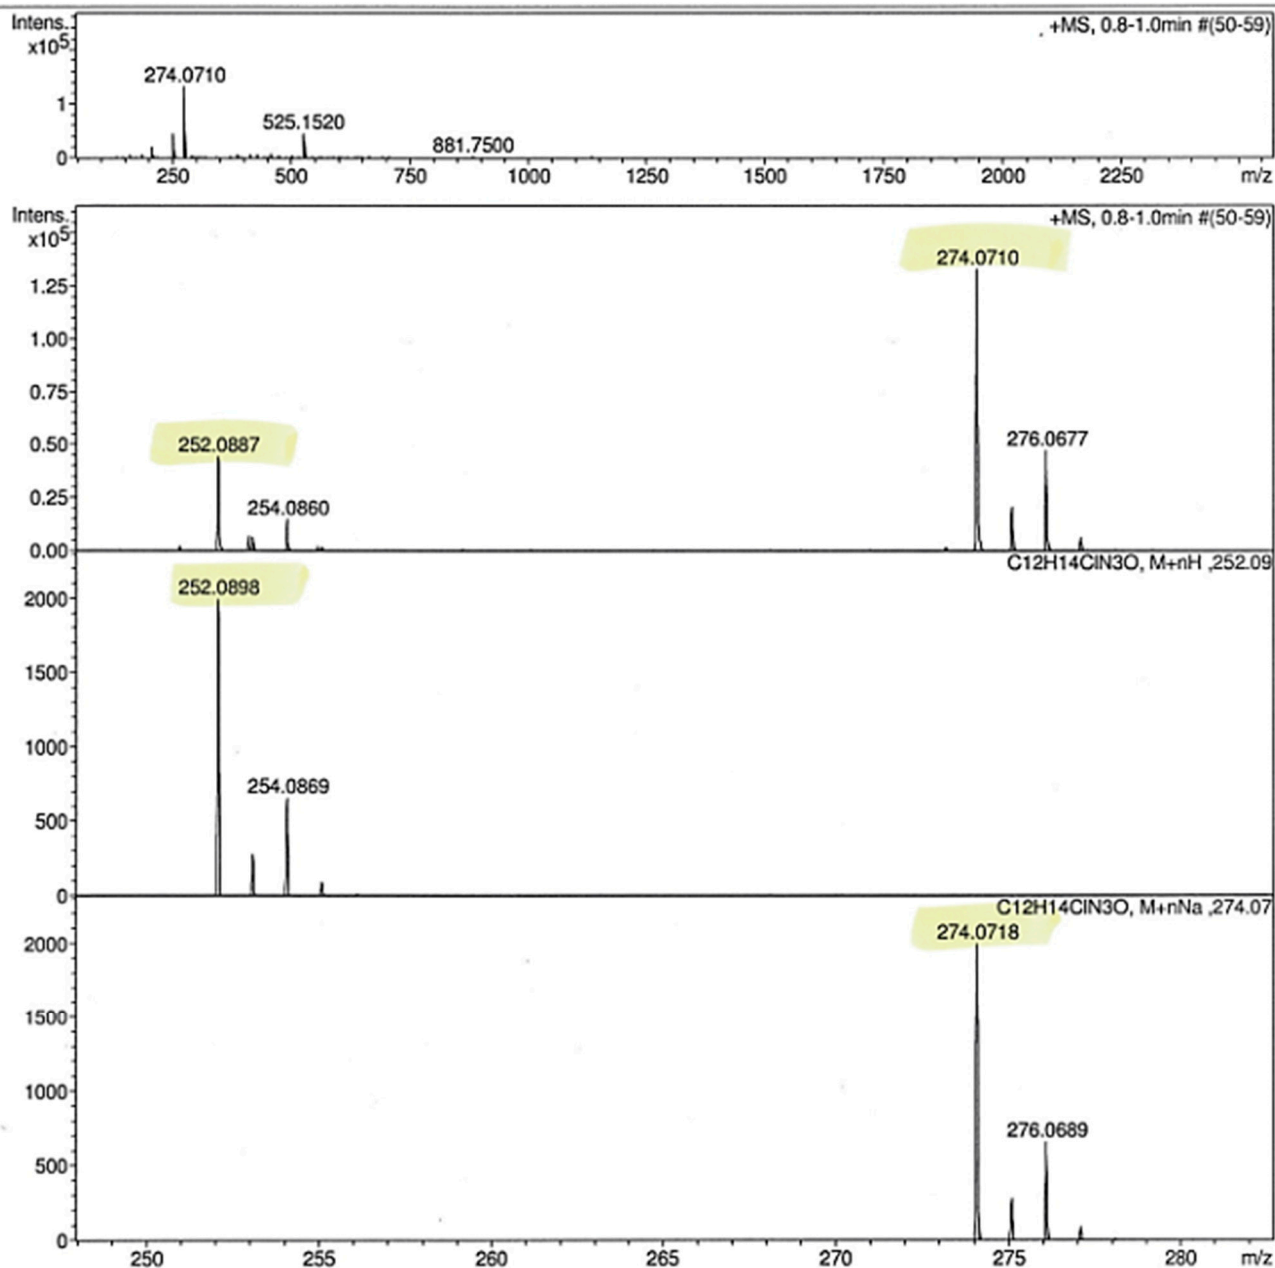

Figure S6. HRMS data of compound 6.

## 5. HPLS data for alcohols 4-6

Conditions: hexane : 2-propanol = 90:10,  
Flow rate = 1.0 mL/min,  $\lambda$  = 220 nm, Chiralpak AD.

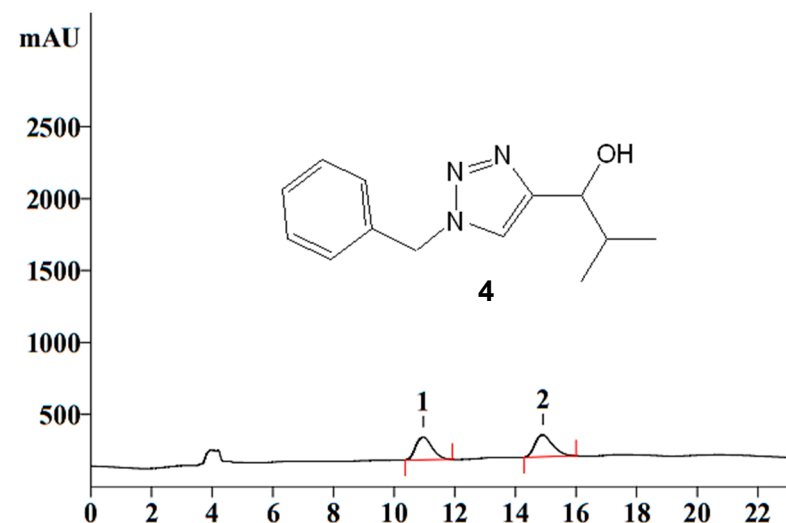

Figure S7. HPLC chromatogram for compound 4, obtained in the experiment without catalyst.

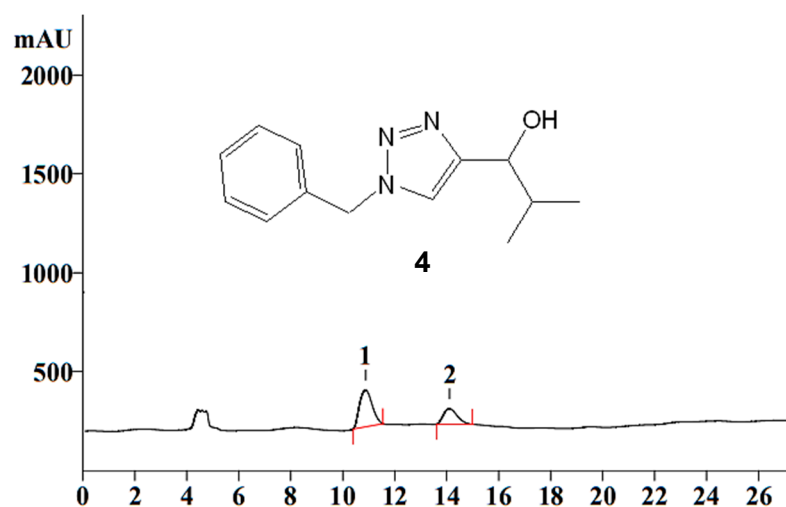

Figure S8. HPLC chromatogram for compound 4, obtained in the experiment with Ephedrine. Yield 33%.

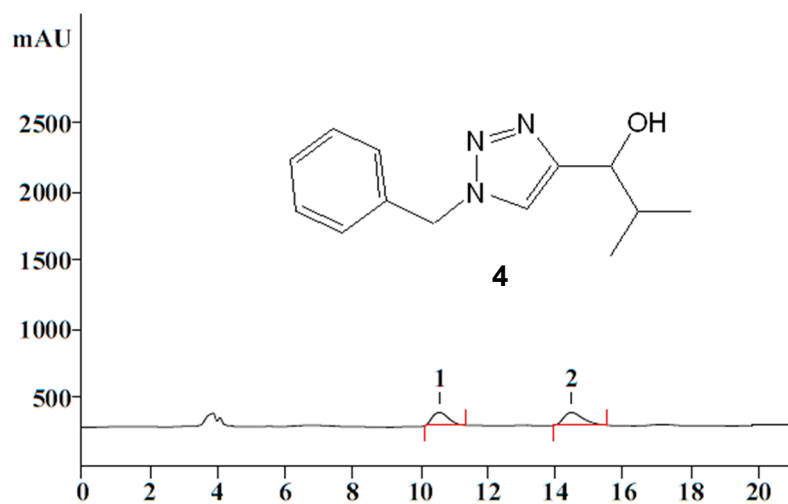

|                      | Peak 1 | Peak 2 |
|----------------------|--------|--------|
| Retention Time (min) | 10.56  | 14.47  |
| Relative Area (%)    | 46.74  | 53.26  |

Figure S9. HPLC chromatogram for compound 4, obtained in the experiment with (*R,R*)-QiunoxP\*. Yield 25%.

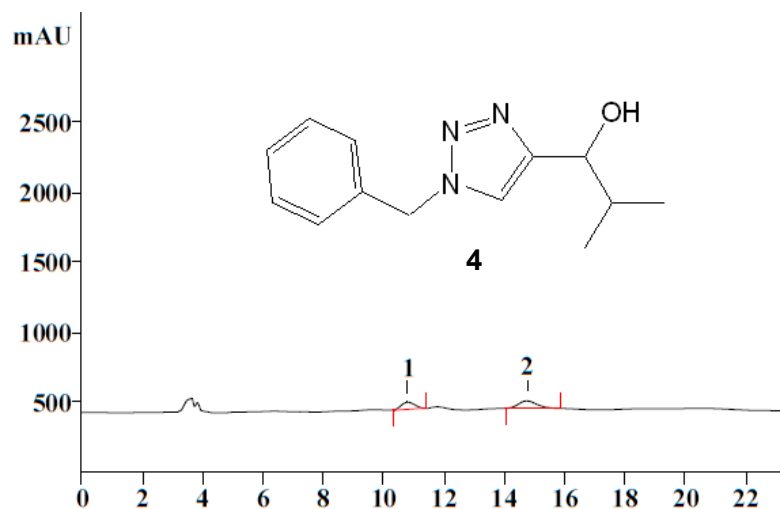

|                      | Peak 1 | Peak 2 |
|----------------------|--------|--------|
| Retention Time (min) | 10.79  | 14.74  |
| Relative Area (%)    | 39.39  | 60.61  |

Figure S10. HPLC chromatogram for compound 4, obtained in the experiment with (*R,R*)-BenzP\*. Yield 30%.

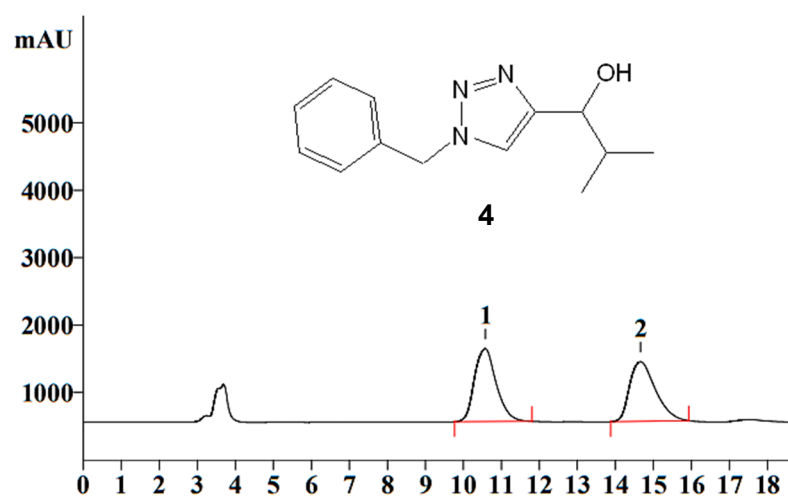

|                      | Peak 1 | Peak 2 |
|----------------------|--------|--------|
| Retention Time (min) | 10.57  | 14.66  |
| Relative Area (%)    | 50.77  | 49.23  |

Figure S11. HPLC chromatogram for compound 4, obtained in the autocatalysis experiment. Yield 30%.

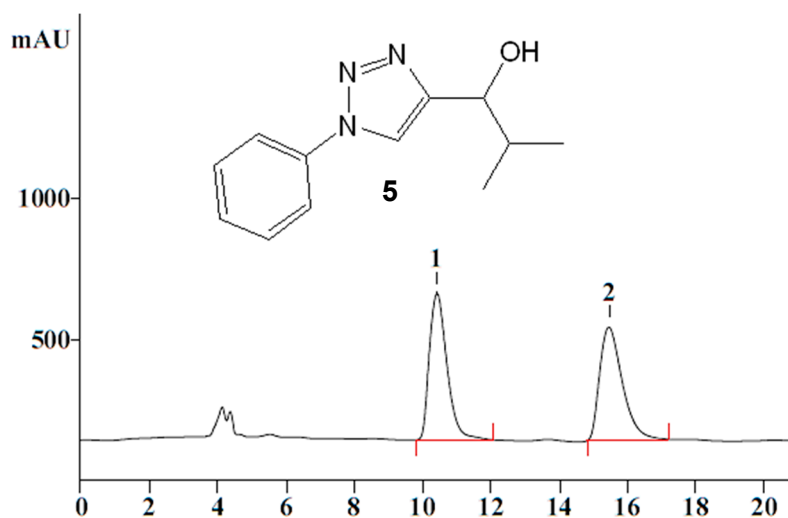

|                      | Peak 1 | Peak 2 |
|----------------------|--------|--------|
| Retention Time (min) | 10.43  | 15.46  |
| Relative Area (%)    | 50.35  | 49.65  |

Figure S12. HPLC chromatogram for compound 5, obtained in the experiment without catalyst.

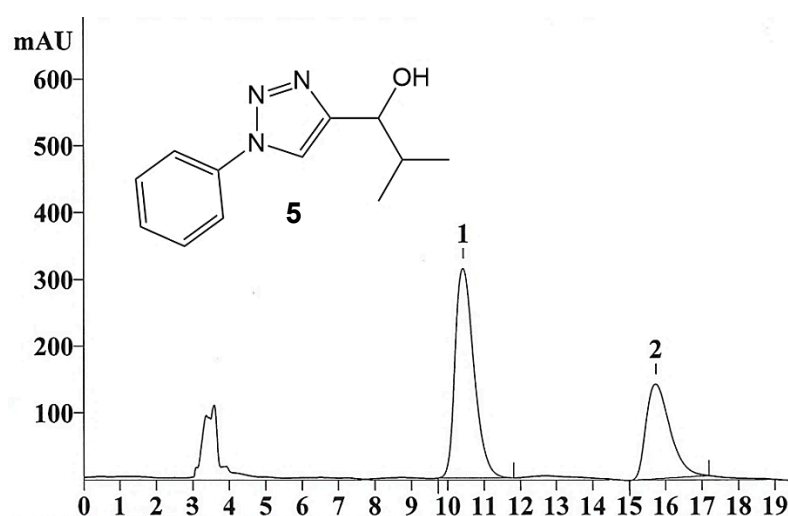

|                      | Peak 1 | Peak 2 |
|----------------------|--------|--------|
| Retention Time (min) | 10.43  | 15.73  |
| Relative Area (%)    | 63.52  | 36.48  |

Figure S13. HPLC chromatogram for compound 5, obtained in the experiment with Ephedrine. Yield 40%.

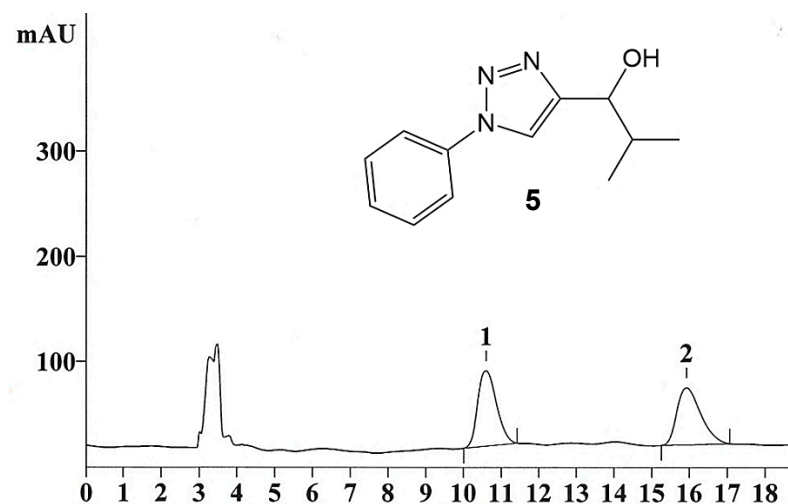

|                      | Peak 1 | Peak 2 |
|----------------------|--------|--------|
| Retention Time (min) | 10.60  | 15.93  |
| Relative Area (%)    | 51.03  | 48.97  |

Figure S14. HPLC chromatogram for compound 5, obtained in the experiment with (R,R)-QiunoxP\*. Yield 75%.

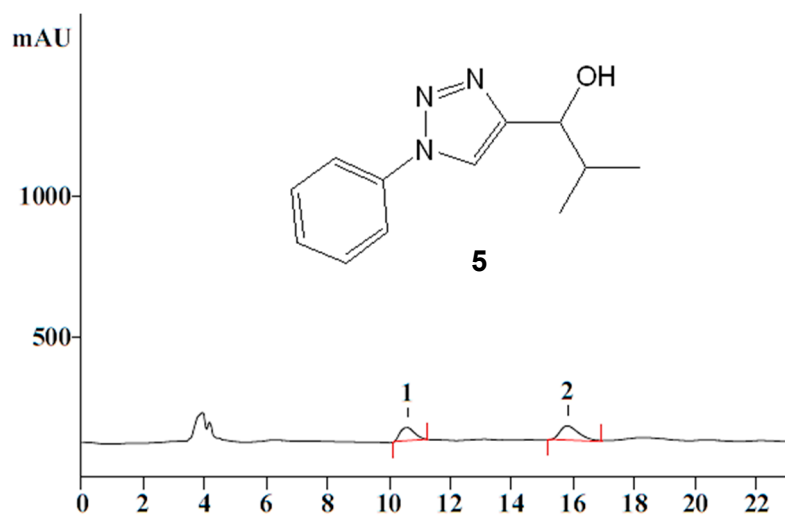

|                      | Peak 1 | Peak 2 |
|----------------------|--------|--------|
| Retention Time (min) | 10.58  | 15.83  |
| Relative Area (%)    | 43.42  | 56.58  |

**Figure S15.** HPLC chromatogram for compound **5**, obtained in the experiment with (*R,R*)-BenzP\*. Yield 24%.

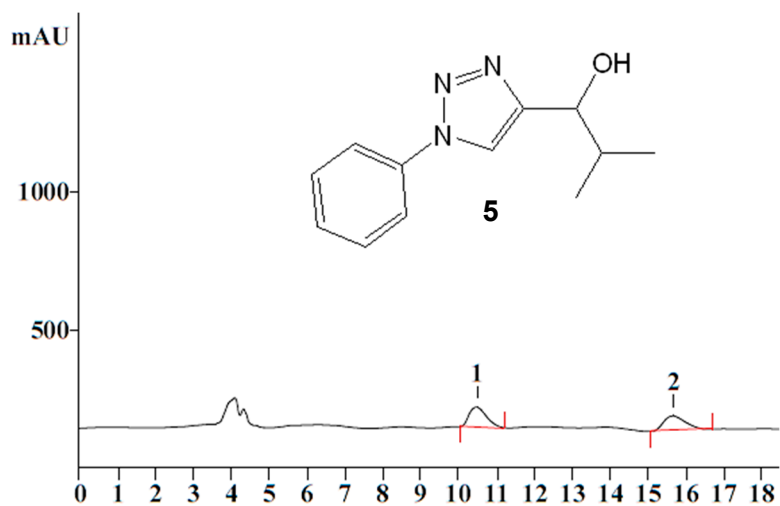

|                      | Peak 1 | Peak 2 |
|----------------------|--------|--------|
| Retention Time (min) | 10.48  | 15.65  |
| Relative Area (%)    | 51.35  | 48.65  |

**Figure S16.** HPLC chromatogram for compound **5**, obtained in the experiment with Sparteine. Yield 13%.

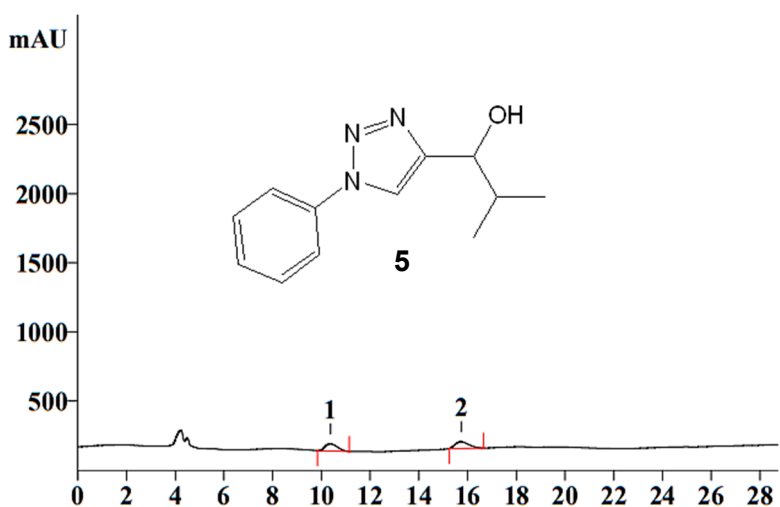

|                      | Peak 1 | Peak 2 |
|----------------------|--------|--------|
| Retention Time (min) | 10.38  | 15.73  |
| Relative Area (%)    | 49.41  | 50.59  |

**Figure S17.** HPLC chromatogram for compound **5**, obtained in the autocatalysis experiment. Yield 48%.

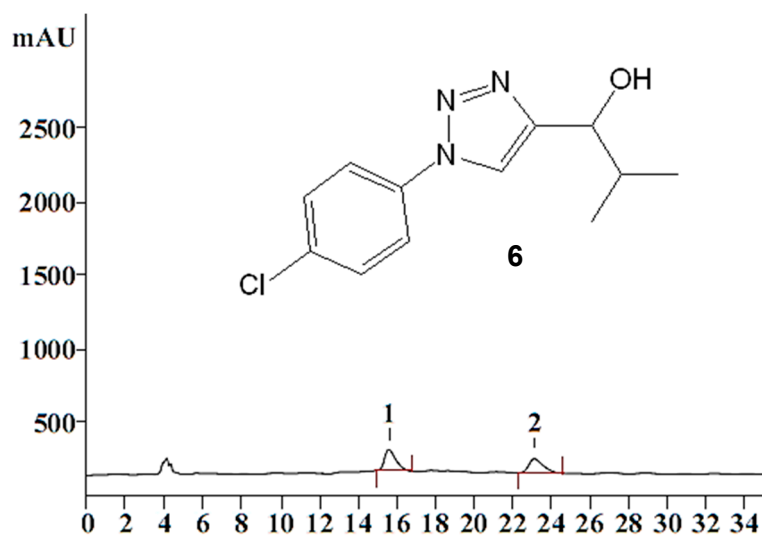

|                      | Peak 1 | Peak 2 |
|----------------------|--------|--------|
| Retention Time (min) | 15.61  | 23.14  |
| Relative Area (%)    | 54.88  | 45.12  |

**Figure S18.** HPLC chromatogram for compound **6**, obtained in the experiment without catalyst.

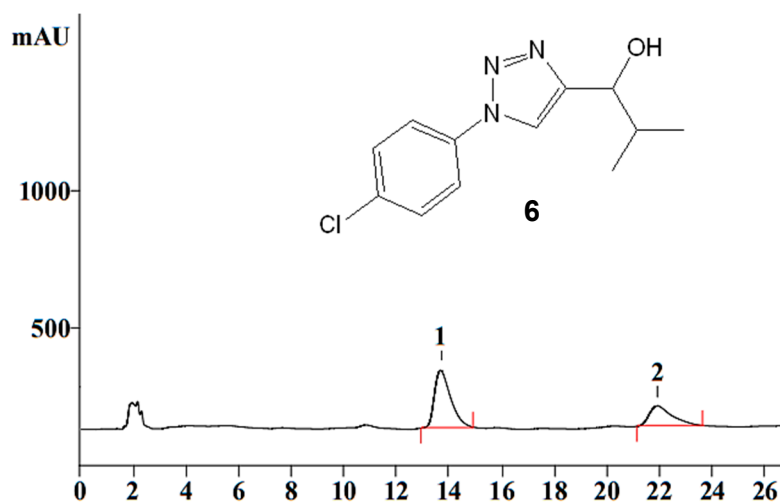

|                      | Peak 1 | Peak 2 |
|----------------------|--------|--------|
| Retention Time (min) | 13.68  | 21.91  |
| Relative Area (%)    | 66.49  | 33.51  |

**Figure S19.** HPLC chromatogram for compound **6**, obtained in the experiment with Ephedrine. Yield 31%.

|                      | Peak 1 | Peak 2 |
|----------------------|--------|--------|
| Retention Time (min) | 10.64  | 15.36  |
| Relative Area (%)    | 42.20  | 57.80  |



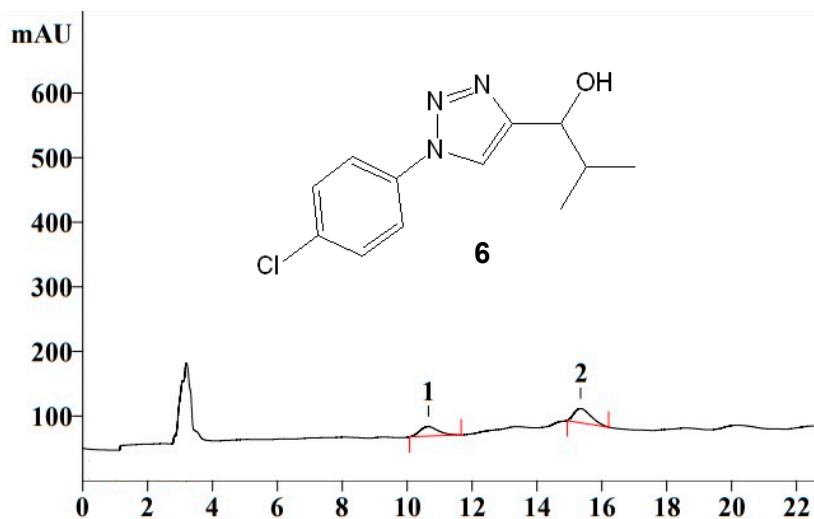

Figure S20. HPLC chromatogram for compound **6**, obtained in the experiment with (*R,R*)-QiunoxP\*. Yield 25%.

|                      | Peak 1 | Peak 2 |
|----------------------|--------|--------|
| Retention Time (min) | 15.12  | 22.91  |
| Relative Area (%)    | 54.28  | 45.72  |

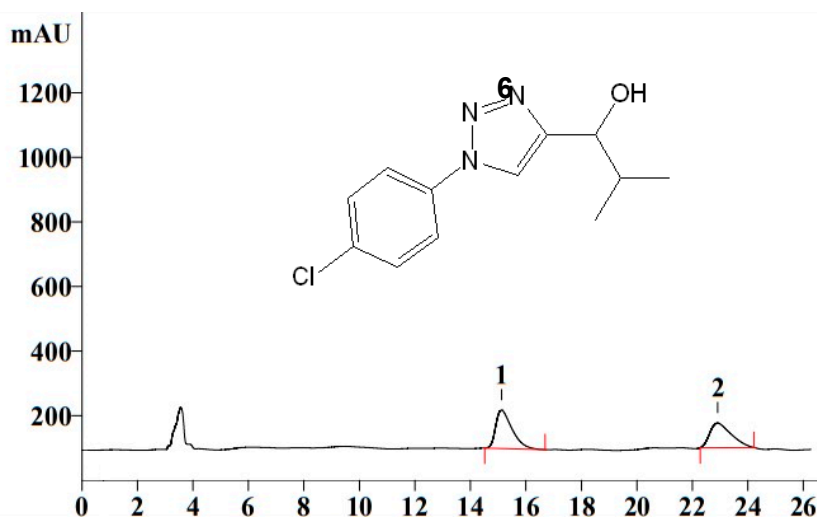

Figure S21. HPLC chromatogram for compound **6**, obtained in the experiment with (*R,R*)-BenzP\*. Yield 20%.

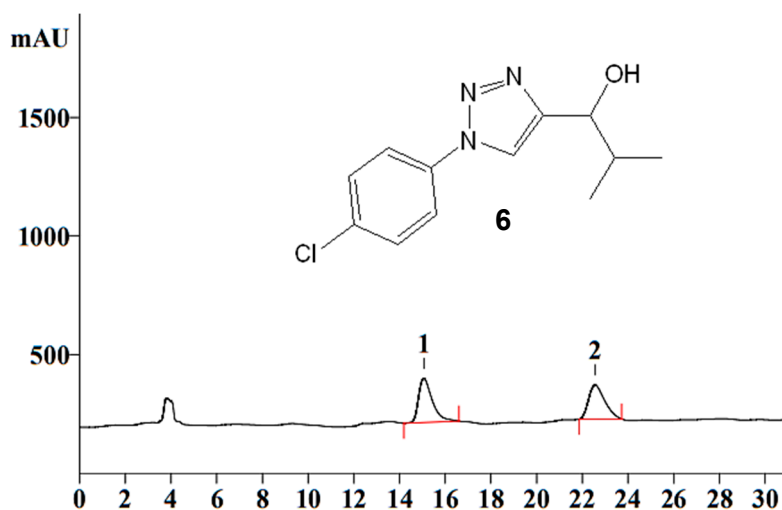

|                      | Peak 1 | Peak 2 |
|----------------------|--------|--------|
| Retention Time (min) | 15.06  | 22.55  |
| Relative Area (%)    | 52.47  | 47.53  |

Figure S22. HPLC chromatogram for compound **6**, obtained in the autocatalysis experiment. Yield 53%.



## 6. Computational details

Geometry optimizations were performed without any symmetry constraints (C1 symmetry) using the  $\omega$ B97XD functional [1] as implemented in the Gaussian09 software package [2]. Frequency calculations were undertaken to confirm the nature of the stationary points, yielding one imaginary frequency for all transition states (TSs) and zero for all minima. Constrained energy hypersurface scans were conducted to investigate the molecular reactivity and to locate viable reaction channels. Where low-lying barriers were estimated, frequency calculations were performed at the crude saddle points, and the obtained force constants were used to optimize the transition-state structures employing the Berny algorithm [3]. All atoms were described with 6-31G\*\* basis set in the geometry optimization and frequency calculation [4–9]. Non-specific solvation was introduced by using the SMD continuum model [10] (acetonitrile).

- 1 Chai, J.-D.; Head-Gordon, M. Long-Range Corrected Hybrid Density Functionals with Damped Atom–Atom Dispersion Corrections. *Phys. Chem. Chem. Phys.* **2008**, *10*, 6615–6620.
- 2 Frisch, M. J.; Trucks, G. W.; Schlegel, H. B.; Scuseria, G. E.; Robb, M. A.; Cheeseman, J. R.; Scalmani, G.; Barone, V.; Mennucci, B.; Petersson, G. A.; Nakatsuji, H.; Caricato, M.; Li, X.; Hratchian, H. P.; Izmaylov, A. F.; Bloino, J.; Zheng, G.; Sonnenberg, J. L.; Hada, M.; Ehara, M.; Toyota, K.; Fukuda, R.; Hasegawa, J.; Ishida, M.; Nakajima, T.; Honda, Y.; Kitao, O.; Nakai, H.; Vreven, T.; Montgomery, J. A., Jr.; Peralta, J. E.; Ogliaro, F.; Bearpark, M.; Heyd, J. J.; Brothers, E.; Kudin, K. N.; Staroverov, V. N.; Kobayashi, R.; Normand, J.; Raghavachari, K.; Rendell, A.; Burant, J. C.; Iyengar, S. S.; Tomasi, J.; Cossi, M.; Rega, N.; Millam, J. M.; Klene, M.; Knox, J. E.; Cross, J. B.; Bakken, V.; Adamo, C.; Jaramillo, J.; Gomperts, R.; Stratmann, R. E.; Yazyev, O.; Austin, A. J.; Cammi, R.; Pomelli, C.; Ochterski, J. W.; Martin, R. L.; Morokuma, K.; Zakrzewski, V. G.; Voth, G. A.; Salvador, P.; Dannenberg, J. J.; Dapprich, S.; Daniels, A. D.; Farkas, O.; Foresman, J. B.; Ortiz, J. V.; Cioslowski, J.; Fox, D. J. *Gaussian 09, Rev. D.01*; Gaussian, Inc.: 2013.
- 3 Becke, A. D. Density-functional exchange-energy approximation with correct asymptotic behavior. *Phys. Rev. A* **1988**, *38*, 3098–3100.
- 4 Ditchfield, R.; Hehre, W. J.; Pople, J. A. Self-Consistent Molecular-Orbital Methods. IX. An Extended Gaussian-Type Basis for Molecular-Orbital Studies of Organic Molecules. *J. Chem. Phys.* **1971**, *54*, 724–728.
- 5 Hehre, W. J.; Ditchfield, R.; Pople, J. A. Self-Consistent Molecular Orbital Methods. XII. Further Extensions of Gaussian-Type Basis Sets for Use in Molecular Orbital Studies of Organic Molecules. *J. Chem. Phys.* **1972**, *56*, 2257–2261.
- 6 Hariharan, P. C.; Pople, J. A. The influence of polarization functions on molecular orbital hydrogenation energies. *Theor. Chim. Acta*, **1973**, *28*, 213–222.
- 7 Francel, M. M.; Pietro, W. J.; Hehre, W. J.; Binkley, J. S.; Gordon, M. S.; DeFrees, D. J.; Pople, J. A. Self-consistent molecular orbital methods. XXIII. A polarization-type basis set for second-row elements. *J. Chem. Phys.* **1982**, *77*, 3654–3665.
- 8 Gordon, M. S.; Binkley, J. S.; Pople, J. A.; Pietro, W. J.; Hehre, W. J. Self-consistent molecular-orbital methods. 22. Small split-valence basis sets for second-row elements. *J. Am. Chem. Soc.* **1982**, *104*, 2797–2803.
- 9 Rassolov, V. A.; Pople, J. A.; Ratner, M. A.; Windus, T. L. 6-31G\* basis set for atoms K through Zn. *J. Chem. Phys.* **1998**, *109*, 1223–1229.
- 10 Marenich, A. V.; Cramer, C. J.; Truhlar, D. G. Universal Solvation Model Based on Solute Electron Density and on a Continuum Model of the Solvent Defined by the Bulk Dielectric Constant and Atomic Surface Tensions. *J. Phys. Chem. B*, **2009**, *113*, 6378–6396.

**Table S1.** Changes of the thermodynamic parameters within three computed catalytic cycles.

| Process                           | DH    | DS     | DG <sub>298</sub> |
|-----------------------------------|-------|--------|-------------------|
| 7(S) -> 9(S)                      | -15.1 | -49.4  | 0.4               |
| 9(S) -> 10                        | -16.3 | -41.8  | -3.8              |
| 10 -> TS1(S)                      | 20.3  | -15.8  | 25.1              |
| TS1(S) -> 7(S).7(S)               | -54.0 | 5.1    | -56.0             |
| 10 -> TS1(R)                      | 28.3  | -13.2  | 32.2              |
| TS1(R) -> 7(S).7(R)               | -51.3 | 4.7    | -52.7             |
|                                   |       |        |                   |
| 8(SS) -> 11                       | -11.4 | -53.4  | 4.5               |
| 11 -> 12                          | -16.6 | 61.7   | -3.1              |
| 12 -> TS2(S)                      | 14.9  | -6.4   | 16.8              |
| TS2(S) -> 8(SS).7(S)              | -62.9 | -7.9   | -60.6             |
| 12 -> TS2(R)                      | 16.0  | -18.2  | 18.0              |
| TS2(R) -> 8(SS).7(R)              | -55.4 | -116.0 | -54.9             |
|                                   |       |        |                   |
| 13(SSSS) -> 14(SSSS)              | -16.5 | -48.7  | -2.02             |
| 14(SSSS) -> 15(SSSS) <sub>s</sub> | -9.8  | -52.2  | 5.8               |
| 15(SSSS) <sub>s</sub> -> TS3(S)   | 22.8  | -3.7   | 23.9              |
| TS3(S) -> 13(SSSS).7(S)           | -58.7 | -0.3   | -58.6             |
| 14(SSSS) -> 15(SSSS) <sub>r</sub> | -6.8  | -37.3  | 4.3               |
| 15(SSSS) <sub>r</sub> -> TS3(R)   | 15.1  | -17.5  | 20.4              |
| TS3(R) -> 13(SSSS).7(R)           | -61.8 | -8.4   | -59.3             |

Sum of electronic and zero-point Energies = -1045.865202

Sum of electronic and thermal Energies = -1045.854121

Sum of electronic and thermal Enthalpies = -1045.853177

Sum of electronic and thermal Free Energies = -1045.904010

Standard orientation:

| Center<br>Number | Atomic<br>Number | Atomic<br>Type | Coordinates (Angstroms) |           |           |
|------------------|------------------|----------------|-------------------------|-----------|-----------|
|                  |                  |                | X                       | Y         | Z         |
| 1                | 6                | 0              | 2.088255                | -0.586477 | -0.146254 |
| 2                | 6                | 0              | 3.262954                | 0.113749  | 0.019795  |
| 3                | 7                | 0              | 1.126595                | 0.324910  | 0.089629  |
| 4                | 1                | 0              | 1.889054                | -1.609495 | -0.421346 |
| 5                | 7                | 0              | 1.672092                | 1.532901  | 0.384996  |
| 6                | 7                | 0              | 2.953516                | 1.402817  | 0.340273  |
| 7                | 6                | 0              | 4.648236                | -0.345412 | -0.113765 |
| 8                | 8                | 0              | 4.948072                | -1.486221 | -0.396496 |
| 9                | 6                | 0              | -0.286742               | 0.166174  | 0.058439  |
| 10               | 6                | 0              | -0.851568               | -1.062266 | 0.385505  |
| 11               | 6                | 0              | -1.081888               | 1.249674  | -0.303700 |
| 12               | 6                | 0              | -2.230852               | -1.217783 | 0.333669  |
| 13               | 1                | 0              | -0.227760               | -1.893085 | 0.696017  |
| 14               | 6                | 0              | -2.461425               | 1.099294  | -0.340814 |
| 15               | 1                | 0              | -0.622472               | 2.198781  | -0.551531 |
| 16               | 6                | 0              | -3.022875               | -0.134206 | -0.028168 |
| 17               | 1                | 0              | -2.683450               | -2.169720 | 0.584598  |
| 18               | 1                | 0              | -3.093557               | 1.933665  | -0.621143 |
| 19               | 17               | 0              | -4.759109               | -0.325276 | -0.086518 |
| 20               | 1                | 0              | 5.408471                | 0.438434  | 0.063654  |

Sum of electronic and zero-point Energies = -2015.961290

Sum of electronic and thermal Energies = -2015.950366

Sum of electronic and thermal Enthalpies = -2015.949422

Sum of electronic and thermal Free Energies = -2015.998456

Standard orientation:

| Center<br>Number | Atomic<br>Number | Atomic<br>Type | Coordinates (Angstroms) |           |           |
|------------------|------------------|----------------|-------------------------|-----------|-----------|
|                  |                  |                | X                       | Y         | Z         |
| 1                | 30               | 0              | -0.000002               | -0.000030 | 0.326530  |
| 2                | 6                | 0              | 1.921276                | -0.262576 | 0.242273  |
| 3                | 1                | 0              | 2.234812                | -0.851544 | 1.117703  |
| 4                | 6                | 0              | 2.698334                | 1.058027  | 0.285270  |
| 5                | 1                | 0              | 3.785227                | 0.895960  | 0.218104  |
| 6                | 1                | 0              | 2.431217                | 1.720018  | -0.549039 |
| 7                | 1                | 0              | 2.514712                | 1.617324  | 1.210475  |
| 8                | 6                | 0              | 2.304848                | -1.068695 | -1.005610 |
| 9                | 1                | 0              | 3.390422                | -1.241006 | -1.066299 |
| 10               | 1                | 0              | 1.822159                | -2.053062 | -1.029714 |
| 11               | 1                | 0              | 2.020532                | -0.550061 | -1.930747 |
| 12               | 6                | 0              | -1.921269               | 0.262578  | 0.242277  |
| 13               | 1                | 0              | -2.234791               | 0.851515  | 1.117733  |
| 14               | 6                | 0              | -2.698365               | -1.058002 | 0.285221  |
| 15               | 1                | 0              | -2.514783               | -1.617331 | 1.210415  |
| 16               | 1                | 0              | -3.785251               | -0.895906 | 0.218029  |
| 17               | 1                | 0              | -2.431238               | -1.719976 | -0.549098 |
| 18               | 6                | 0              | -2.304818               | 1.068764  | -1.005574 |
| 19               | 1                | 0              | -3.390386               | 1.241119  | -1.066245 |
| 20               | 1                | 0              | -1.822093               | 2.053114  | -1.029637 |
| 21               | 1                | 0              | -2.020529               | 0.550158  | -1.930735 |

Sum of electronic and zero-point Energies = -3061.899889

Sum of electronic and thermal Energies = -3061.878054

Sum of electronic and thermal Enthalpies = -3061.877110

Sum of electronic and thermal Free Energies = -3061.953001

Standard orientation:

| Center<br>Number | Atomic<br>Number | Atomic<br>Type | Coordinates (Angstroms) |           |           |
|------------------|------------------|----------------|-------------------------|-----------|-----------|
|                  |                  |                | X                       | Y         | Z         |
| 1                | 6                | 0              | -0.455754               | -1.507521 | -0.527699 |
| 2                | 6                | 0              | 0.858819                | -1.113966 | -0.533672 |
| 3                | 7                | 0              | -1.152245               | -0.378697 | -0.225987 |
| 4                | 1                | 0              | -0.934823               | -2.450291 | -0.733858 |
| 5                | 7                | 0              | -0.336332               | 0.660094  | -0.050675 |
| 6                | 7                | 0              | 0.869786                | 0.208649  | -0.235559 |
| 7                | 6                | 0              | 2.186983                | -1.808520 | -0.766698 |
| 8                | 8                | 0              | 3.207965                | -0.885754 | -0.868942 |
| 9                | 1                | 0              | 2.088440                | -2.378184 | -1.708682 |
| 10               | 6                | 0              | 2.449396                | -2.847961 | 0.355711  |
| 11               | 6                | 0              | 2.594518                | -2.174507 | 1.719551  |
| 12               | 1                | 0              | 1.580114                | -3.521471 | 0.385047  |
| 13               | 1                | 0              | 1.694056                | -1.616717 | 2.000764  |
| 14               | 1                | 0              | 2.783230                | -2.913828 | 2.504097  |
| 15               | 30               | 0              | 2.902403                | 0.860572  | -0.377800 |
| 16               | 6                | 0              | 3.309315                | 2.712730  | 0.028270  |
| 17               | 1                | 0              | 4.002223                | 3.112729  | -0.724666 |
| 18               | 6                | 0              | 3.969341                | 2.884075  | 1.400716  |
| 19               | 6                | 0              | 2.016665                | 3.534314  | -0.048303 |
| 20               | 1                | 0              | 4.927783                | 2.356872  | 1.469124  |
| 21               | 1                | 0              | 4.163141                | 3.943416  | 1.630609  |
| 22               | 1                | 0              | 3.331286                | 2.500470  | 2.207794  |
| 23               | 1                | 0              | 2.192442                | 4.599980  | 0.165701  |
| 24               | 1                | 0              | 1.546240                | 3.475608  | -1.037036 |
| 25               | 1                | 0              | 1.271157                | 3.182713  | 0.676578  |
| 26               | 1                | 0              | 3.436611                | -1.475370 | 1.708027  |
| 27               | 6                | 0              | 3.691448                | -3.668026 | 0.012014  |

|    |    |   |           |           |           |
|----|----|---|-----------|-----------|-----------|
| 28 | 1  | 0 | 4.562344  | -3.011302 | -0.068657 |
| 29 | 1  | 0 | 3.895226  | -4.421481 | 0.779930  |
| 30 | 1  | 0 | 3.572702  | -4.186464 | -0.945856 |
| 31 | 6  | 0 | -2.561104 | -0.205965 | -0.109665 |
| 32 | 6  | 0 | -3.356662 | -1.276054 | 0.286145  |
| 33 | 6  | 0 | -3.118559 | 1.036878  | -0.395991 |
| 34 | 6  | 0 | -4.732019 | -1.107110 | 0.382867  |
| 35 | 1  | 0 | -2.914437 | -2.233888 | 0.535538  |
| 36 | 6  | 0 | -4.491080 | 1.210796  | -0.283584 |
| 37 | 1  | 0 | -2.481484 | 1.857581  | -0.702624 |
| 38 | 6  | 0 | -5.286240 | 0.135396  | 0.098595  |
| 39 | 1  | 0 | -5.363618 | -1.932748 | 0.688739  |
| 40 | 1  | 0 | -4.938763 | 2.173282  | -0.500925 |
| 41 | 17 | 0 | -7.015797 | 0.350017  | 0.225405  |

---



Sum of electronic and zero-point Energies = -5077.885364

Sum of electronic and thermal Energies = -5077.851559

Sum of electronic and thermal Enthalpies = -5077.850615

Sum of electronic and thermal Free Energies = -5077.952078

Standard orientation:

| Center<br>Number | Atomic<br>Number | Atomic<br>Type | Coordinates (Angstroms) |           |           |
|------------------|------------------|----------------|-------------------------|-----------|-----------|
|                  |                  |                | X                       | Y         | Z         |
| 1                | 6                | 0              | -1.823406               | -1.225562 | -0.403781 |
| 2                | 6                | 0              | -0.573449               | -0.685511 | -0.239930 |
| 3                | 7                | 0              | -2.675693               | -0.226278 | -0.060022 |
| 4                | 1                | 0              | -2.166732               | -2.187110 | -0.748392 |
| 5                | 7                | 0              | -2.004992               | 0.872707  | 0.297509  |
| 6                | 7                | 0              | -0.744286               | 0.591210  | 0.186031  |
| 7                | 6                | 0              | 0.815510                | -1.211962 | -0.498386 |
| 8                | 8                | 0              | 1.708629                | -0.393561 | 0.198992  |
| 9                | 1                | 0              | 0.985068                | -1.128023 | -1.587764 |
| 10               | 6                | 0              | 0.940696                | -2.704318 | -0.126162 |
| 11               | 6                | 0              | 0.783284                | -2.932903 | 1.376379  |
| 12               | 1                | 0              | 0.130334                | -3.225961 | -0.654097 |
| 13               | 1                | 0              | -0.174653               | -2.557962 | 1.748902  |
| 14               | 1                | 0              | 0.843916                | -3.999727 | 1.613171  |
| 15               | 30               | 0              | 3.507700                | -0.464232 | -0.034822 |
| 16               | 6                | 0              | 5.411074                | -0.537504 | -0.276270 |
| 17               | 1                | 0              | 5.812550                | 0.392469  | 0.149927  |
| 18               | 6                | 0              | 5.783155                | -0.567010 | -1.762729 |
| 19               | 6                | 0              | 6.059109                | -1.704913 | 0.473933  |
| 20               | 1                | 0              | 5.388657                | 0.298428  | -2.306381 |
| 21               | 1                | 0              | 6.873925                | -0.569127 | -1.900198 |
| 22               | 1                | 0              | 5.400666                | -1.467653 | -2.260312 |
| 23               | 1                | 0              | 7.150620                | -1.703925 | 0.342223  |
| 24               | 1                | 0              | 5.863686                | -1.666878 | 1.551668  |
| 25               | 1                | 0              | 5.700639                | -2.676627 | 0.110597  |
| 26               | 1                | 0              | 1.574850                | -2.416992 | 1.928488  |
| 27               | 6                | 0              | 2.261579                | -3.284465 | -0.631034 |

|    |    |   |           |           |           |
|----|----|---|-----------|-----------|-----------|
| 28 | 1  | 0 | 3.115022  | -2.864058 | -0.084616 |
| 29 | 1  | 0 | 2.302344  | -4.366024 | -0.475064 |
| 30 | 1  | 0 | 2.411867  | -3.092011 | -1.699496 |
| 31 | 6  | 0 | -4.097383 | -0.236144 | -0.059396 |
| 32 | 6  | 0 | -4.776709 | -1.416795 | 0.222181  |
| 33 | 6  | 0 | -4.785140 | 0.938228  | -0.349598 |
| 34 | 6  | 0 | -6.165639 | -1.429931 | 0.197080  |
| 35 | 1  | 0 | -4.233820 | -2.320721 | 0.475890  |
| 36 | 6  | 0 | -6.173362 | 0.929929  | -0.358370 |
| 37 | 1  | 0 | -4.237571 | 1.847539  | -0.566490 |
| 38 | 6  | 0 | -6.850439 | -0.255387 | -0.091844 |
| 39 | 1  | 0 | -6.707367 | -2.343426 | 0.412665  |
| 40 | 1  | 0 | -6.722023 | 1.837645  | -0.580910 |
| 41 | 17 | 0 | -8.598226 | -0.269090 | -0.119062 |
| 42 | 30 | 0 | 1.082071  | 1.790886  | 0.274363  |
| 43 | 6  | 0 | 1.360276  | 2.321779  | -1.630259 |
| 44 | 1  | 0 | 1.468802  | 3.416666  | -1.667320 |
| 45 | 6  | 0 | 2.661536  | 1.740906  | -2.191444 |
| 46 | 1  | 0 | 2.665016  | 0.639363  | -2.139006 |
| 47 | 1  | 0 | 2.834204  | 1.988800  | -3.252013 |
| 48 | 1  | 0 | 3.543242  | 2.093609  | -1.638100 |
| 49 | 6  | 0 | 0.192488  | 1.962744  | -2.552610 |
| 50 | 1  | 0 | 0.030892  | 0.876143  | -2.599439 |
| 51 | 1  | 0 | -0.751970 | 2.401964  | -2.208612 |
| 52 | 1  | 0 | 0.347561  | 2.297734  | -3.592228 |
| 53 | 6  | 0 | 1.618841  | 2.079087  | 2.161271  |
| 54 | 1  | 0 | 1.443118  | 3.122307  | 2.464011  |
| 55 | 6  | 0 | 0.821067  | 1.179729  | 3.107628  |
| 56 | 1  | 0 | -0.253075 | 1.399279  | 3.071387  |
| 57 | 1  | 0 | 0.935117  | 0.123020  | 2.830693  |
| 58 | 1  | 0 | 1.137250  | 1.272552  | 4.161125  |
| 59 | 6  | 0 | 3.118208  | 1.815447  | 2.337708  |
| 60 | 1  | 0 | 3.738027  | 2.479034  | 1.720349  |
| 61 | 1  | 0 | 3.463283  | 1.925025  | 3.379516  |
| 62 | 1  | 0 | 3.381244  | 0.781928  | 2.054878  |

---

Sum of electronic and zero-point Energies = -6123.777553

Sum of electronic and thermal Energies = -6123.730666

Sum of electronic and thermal Enthalpies = -6123.729722

Sum of electronic and thermal Free Energies = -6123.862177

Standard orientation:

| Center<br>Number | Atomic<br>Number | Atomic<br>Type | Coordinates (Angstroms) |           |           |
|------------------|------------------|----------------|-------------------------|-----------|-----------|
|                  |                  |                | X                       | Y         | Z         |
| 1                | 6                | 0              | -0.778966               | 1.547672  | 2.649061  |
| 2                | 6                | 0              | 0.225839                | 0.610102  | 2.652857  |
| 3                | 7                | 0              | -1.534132               | 1.238157  | 1.563701  |
| 4                | 1                | 0              | -1.013829               | 2.383623  | 3.287689  |
| 5                | 7                | 0              | -1.046419               | 0.180571  | 0.925983  |
| 6                | 7                | 0              | 0.008640                | -0.189866 | 1.585197  |
| 7                | 6                | 0              | 1.461527                | 0.322663  | 3.483003  |
| 8                | 8                | 0              | 1.895802                | -0.963924 | 3.250129  |
| 9                | 1                | 0              | 1.186109                | 0.460450  | 4.543924  |
| 10               | 6                | 0              | 2.554650                | 1.384281  | 3.166417  |
| 11               | 6                | 0              | 3.024908                | 1.301666  | 1.713137  |
| 12               | 1                | 0              | 2.102765                | 2.373703  | 3.330988  |
| 13               | 1                | 0              | 2.198700                | 1.414514  | 1.002628  |
| 14               | 1                | 0              | 3.757639                | 2.085028  | 1.494771  |
| 15               | 30               | 0              | 1.374851                | -1.791434 | 1.656521  |
| 16               | 6                | 0              | 1.842782                | -3.220416 | 0.419509  |
| 17               | 1                | 0              | 1.087703                | -3.207515 | -0.376977 |
| 18               | 6                | 0              | 1.769773                | -4.605543 | 1.069258  |
| 19               | 6                | 0              | 3.216929                | -2.994602 | -0.219052 |
| 20               | 1                | 0              | 0.777540                | -4.804650 | 1.489324  |
| 21               | 1                | 0              | 1.982215                | -5.409072 | 0.346384  |
| 22               | 1                | 0              | 2.495613                | -4.712471 | 1.885640  |
| 23               | 1                | 0              | 3.453196                | -3.753118 | -0.983186 |
| 24               | 1                | 0              | 3.296415                | -2.010824 | -0.699159 |
| 25               | 1                | 0              | 4.017533                | -3.039869 | 0.530047  |
| 26               | 1                | 0              | 3.507232                | 0.336903  | 1.522831  |
| 27               | 6                | 0              | 3.727388                | 1.214563  | 4.128828  |

|    |    |   |           |           |           |
|----|----|---|-----------|-----------|-----------|
| 28 | 1  | 0 | 4.160103  | 0.216124  | 4.017195  |
| 29 | 1  | 0 | 4.510486  | 1.955114  | 3.934616  |
| 30 | 1  | 0 | 3.408099  | 1.328300  | 5.170644  |
| 31 | 6  | 0 | -2.705017 | 1.895236  | 1.079607  |
| 32 | 6  | 0 | -2.678880 | 2.462164  | -0.187626 |
| 33 | 6  | 0 | -3.843747 | 1.935712  | 1.875056  |
| 34 | 6  | 0 | -3.821388 | 3.079815  | -0.677825 |
| 35 | 1  | 0 | -1.776026 | 2.404665  | -0.784513 |
| 36 | 6  | 0 | -4.985512 | 2.561794  | 1.391203  |
| 37 | 1  | 0 | -3.844241 | 1.464391  | 2.851747  |
| 38 | 6  | 0 | -4.960853 | 3.123320  | 0.118600  |
| 39 | 1  | 0 | -3.827316 | 3.516096  | -1.669312 |
| 40 | 1  | 0 | -5.888382 | 2.596595  | 1.988989  |
| 41 | 17 | 0 | -6.400769 | 3.897063  | -0.497656 |
| 42 | 30 | 0 | -1.929769 | -1.480685 | -0.664456 |
| 43 | 6  | 0 | -1.833715 | -2.841360 | 0.772124  |
| 44 | 1  | 0 | -0.861981 | -2.761760 | 1.280806  |
| 45 | 6  | 0 | -2.898700 | -2.524895 | 1.828854  |
| 46 | 1  | 0 | -3.912185 | -2.559953 | 1.406603  |
| 47 | 1  | 0 | -2.884830 | -3.236884 | 2.671019  |
| 48 | 1  | 0 | -2.768616 | -1.521772 | 2.258173  |
| 49 | 6  | 0 | -1.971507 | -4.288261 | 0.299067  |
| 50 | 1  | 0 | -2.911779 | -4.445894 | -0.246331 |
| 51 | 1  | 0 | -1.164194 | -4.572074 | -0.383868 |
| 52 | 1  | 0 | -1.968533 | -5.008905 | 1.134901  |
| 53 | 6  | 0 | -3.132016 | -0.511777 | -1.908424 |
| 54 | 1  | 0 | -2.737937 | 0.508744  | -2.040095 |
| 55 | 6  | 0 | -3.195705 | -1.131536 | -3.307184 |
| 56 | 1  | 0 | -2.208435 | -1.175282 | -3.783859 |
| 57 | 1  | 0 | -3.576845 | -2.160221 | -3.280842 |
| 58 | 1  | 0 | -3.856676 | -0.567078 | -3.987475 |
| 59 | 6  | 0 | -4.547101 | -0.377401 | -1.334714 |
| 60 | 1  | 0 | -4.553435 | 0.104774  | -0.349377 |
| 61 | 1  | 0 | -5.219724 | 0.209582  | -1.983780 |
| 62 | 1  | 0 | -5.019029 | -1.361048 | -1.206291 |
| 63 | 8  | 0 | -0.888271 | -3.520837 | -2.757374 |
| 64 | 6  | 0 | 0.160325  | -3.047079 | -3.131423 |
| 65 | 1  | 0 | 0.788158  | -3.551522 | -3.889000 |
| 66 | 6  | 0 | 0.698306  | -1.781320 | -2.619419 |

|    |    |   |          |           |           |
|----|----|---|----------|-----------|-----------|
| 67 | 6  | 0 | 1.873655 | -1.141756 | -2.938452 |
| 68 | 7  | 0 | 0.070068 | -1.045243 | -1.659726 |
| 69 | 1  | 0 | 2.660246 | -1.368324 | -3.640459 |
| 70 | 7  | 0 | 0.777946 | -0.004409 | -1.380796 |
| 71 | 7  | 0 | 1.882154 | -0.049991 | -2.149044 |
| 72 | 6  | 0 | 2.879935 | 0.954834  | -2.001223 |
| 73 | 6  | 0 | 2.485062 | 2.277237  | -1.830750 |
| 74 | 6  | 0 | 4.220829 | 0.589512  | -1.985325 |
| 75 | 6  | 0 | 3.452198 | 3.254011  | -1.639772 |
| 76 | 1  | 0 | 1.432548 | 2.534935  | -1.842995 |
| 77 | 6  | 0 | 5.190238 | 1.568410  | -1.807132 |
| 78 | 1  | 0 | 4.510348 | -0.450934 | -2.086282 |
| 79 | 6  | 0 | 4.795401 | 2.890109  | -1.632332 |
| 80 | 1  | 0 | 3.164523 | 4.289514  | -1.501594 |
| 81 | 1  | 0 | 6.240009 | 1.301132  | -1.786499 |
| 82 | 17 | 0 | 6.011150 | 4.119946  | -1.389625 |

---

# TS1(S)

Sum of electronic and zero-point Energies = -6123.743006

Sum of electronic and thermal Energies = -6123.698264

Sum of electronic and thermal Enthalpies = -6123.697319

Sum of electronic and thermal Free Energies = -6123.822245

Standard orientation:

| Center<br>Number | Atomic<br>Number | Atomic<br>Type | Coordinates (Angstroms) |           |           |
|------------------|------------------|----------------|-------------------------|-----------|-----------|
|                  |                  |                | X                       | Y         | Z         |
| 1                | 6                | 0              | 1.228026                | 2.645144  | -0.515747 |
| 2                | 6                | 0              | 0.080806                | 2.207512  | 0.107884  |
| 3                | 7                | 0              | 2.168551                | 1.736531  | -0.188802 |
| 4                | 1                | 0              | 1.446460                | 3.495499  | -1.141025 |
| 5                | 7                | 0              | 1.659083                | 0.784011  | 0.585201  |
| 6                | 7                | 0              | 0.401129                | 1.075192  | 0.770691  |
| 7                | 6                | 0              | -1.346332               | 2.704304  | 0.173229  |
| 8                | 8                | 0              | -2.153596               | 1.713288  | 0.692073  |
| 9                | 1                | 0              | -1.643058               | 2.947877  | -0.863882 |
| 10               | 6                | 0              | -1.429427               | 4.023687  | 0.983421  |
| 11               | 6                | 0              | -1.054532               | 3.808987  | 2.449134  |
| 12               | 1                | 0              | -0.710747               | 4.726115  | 0.536370  |
| 13               | 1                | 0              | -0.054194               | 3.374332  | 2.561701  |
| 14               | 1                | 0              | -1.062795               | 4.757803  | 2.993862  |
| 15               | 30               | 0              | -1.383360               | 0.305606  | 1.669397  |
| 16               | 6                | 0              | -2.052360               | -0.973070 | 2.976223  |
| 17               | 1                | 0              | -1.211010               | -1.432345 | 3.511272  |
| 18               | 6                | 0              | -2.846934               | -2.102821 | 2.310679  |
| 19               | 6                | 0              | -2.918532               | -0.249514 | 4.014345  |
| 20               | 1                | 0              | -2.238908               | -2.696956 | 1.619702  |
| 21               | 1                | 0              | -3.251453               | -2.801852 | 3.058288  |
| 22               | 1                | 0              | -3.705243               | -1.720249 | 1.743442  |
| 23               | 1                | 0              | -3.321545               | -0.949619 | 4.762055  |
| 24               | 1                | 0              | -2.358408               | 0.518469  | 4.561514  |
| 25               | 1                | 0              | -3.779533               | 0.248878  | 3.550940  |
| 26               | 1                | 0              | -1.772892               | 3.141061  | 2.934875  |
| 27               | 6                | 0              | -2.833005               | 4.612098  | 0.854960  |

|    |    |   |           |           |           |
|----|----|---|-----------|-----------|-----------|
| 28 | 1  | 0 | -3.572933 | 3.905976  | 1.243341  |
| 29 | 1  | 0 | -2.922559 | 5.548317  | 1.414813  |
| 30 | 1  | 0 | -3.081149 | 4.821463  | -0.191510 |
| 31 | 6  | 0 | 3.529959  | 1.659488  | -0.633377 |
| 32 | 6  | 0 | 4.540533  | 2.111438  | 0.204076  |
| 33 | 6  | 0 | 3.794408  | 1.094520  | -1.874536 |
| 34 | 6  | 0 | 5.860788  | 1.998712  | -0.212788 |
| 35 | 1  | 0 | 4.299201  | 2.537616  | 1.171571  |
| 36 | 6  | 0 | 5.114040  | 0.981814  | -2.292108 |
| 37 | 1  | 0 | 2.980678  | 0.713813  | -2.481578 |
| 38 | 6  | 0 | 6.130094  | 1.435334  | -1.456584 |
| 39 | 1  | 0 | 6.669369  | 2.337645  | 0.423696  |
| 40 | 1  | 0 | 5.349320  | 0.530066  | -3.248196 |
| 41 | 17 | 0 | 7.788433  | 1.285618  | -1.978233 |
| 42 | 30 | 0 | 2.462567  | -1.238606 | 0.263946  |
| 43 | 6  | 0 | 0.792394  | -2.330739 | 1.241256  |
| 44 | 1  | 0 | -0.219031 | -1.930865 | 1.284231  |
| 45 | 6  | 0 | 0.771447  | -3.849887 | 1.281293  |
| 46 | 1  | 0 | 1.781325  | -4.262025 | 1.156649  |
| 47 | 1  | 0 | 0.390268  | -4.212880 | 2.245561  |
| 48 | 1  | 0 | 0.132984  | -4.281002 | 0.505921  |
| 49 | 6  | 0 | 1.481532  | -1.814869 | 2.536177  |
| 50 | 1  | 0 | 2.499083  | -2.198788 | 2.664895  |
| 51 | 1  | 0 | 1.512621  | -0.723310 | 2.629786  |
| 52 | 1  | 0 | 0.905076  | -2.176637 | 3.398447  |
| 53 | 6  | 0 | 4.370567  | -1.715433 | 0.222949  |
| 54 | 1  | 0 | 4.941231  | -0.781630 | 0.125775  |
| 55 | 6  | 0 | 4.909248  | -2.443046 | 1.456223  |
| 56 | 1  | 0 | 4.811509  | -1.842661 | 2.368658  |
| 57 | 1  | 0 | 4.384337  | -3.390412 | 1.637209  |
| 58 | 1  | 0 | 5.976631  | -2.692314 | 1.348749  |
| 59 | 6  | 0 | 4.641511  | -2.538782 | -1.042291 |
| 60 | 1  | 0 | 4.286506  | -2.035786 | -1.949065 |
| 61 | 1  | 0 | 5.714662  | -2.742949 | -1.181139 |
| 62 | 1  | 0 | 4.138178  | -3.514033 | -1.002615 |
| 63 | 8  | 0 | 1.346794  | -1.043808 | -1.430432 |
| 64 | 6  | 0 | 0.726255  | -2.065968 | -0.923284 |
| 65 | 1  | 0 | 1.154442  | -3.067832 | -1.075877 |
| 66 | 6  | 0 | -0.751186 | -2.076877 | -1.031890 |

|    |    |   |           |           |           |
|----|----|---|-----------|-----------|-----------|
| 67 | 6  | 0 | -1.619613 | -1.021168 | -1.196542 |
| 68 | 7  | 0 | -1.482246 | -3.225817 | -1.017348 |
| 69 | 1  | 0 | -1.468845 | 0.039998  | -1.300264 |
| 70 | 7  | 0 | -2.737292 | -2.939935 | -1.159451 |
| 71 | 7  | 0 | -2.840422 | -1.602043 | -1.267966 |
| 72 | 6  | 0 | -4.112618 | -0.992626 | -1.460192 |
| 73 | 6  | 0 | -5.113453 | -1.707202 | -2.113549 |
| 74 | 6  | 0 | -4.333168 | 0.297870  | -0.989003 |
| 75 | 6  | 0 | -6.357678 | -1.120157 | -2.300945 |
| 76 | 1  | 0 | -4.919899 | -2.712360 | -2.467925 |
| 77 | 6  | 0 | -5.576654 | 0.886411  | -1.189091 |
| 78 | 1  | 0 | -3.558173 | 0.844974  | -0.448791 |
| 79 | 6  | 0 | -6.575481 | 0.173972  | -1.840767 |
| 80 | 1  | 0 | -7.147588 | -1.662653 | -2.807233 |
| 81 | 1  | 0 | -5.763896 | 1.889589  | -0.823694 |
| 82 | 17 | 0 | -8.142388 | 0.917527  | -2.083834 |

---



Sum of electronic and zero-point Energies = -6123.829391

Sum of electronic and thermal Energies = -6123.784352

Sum of electronic and thermal Enthalpies = -6123.783408

Sum of electronic and thermal Free Energies = -6123.911536

Standard orientation:

| Center<br>Number | Atomic<br>Number | Atomic<br>Type | Coordinates (Angstroms) |           |           |
|------------------|------------------|----------------|-------------------------|-----------|-----------|
|                  |                  |                | X                       | Y         | Z         |
| 1                | 6                | 0              | 0.215904                | -2.131266 | 0.838844  |
| 2                | 6                | 0              | -1.008089               | -1.519777 | 0.731973  |
| 3                | 7                | 0              | 1.019158                | -1.191635 | 1.400624  |
| 4                | 1                | 0              | 0.569192                | -3.112283 | 0.567299  |
| 5                | 7                | 0              | 0.350948                | -0.066630 | 1.644459  |
| 6                | 7                | 0              | -0.870462               | -0.268806 | 1.243417  |
| 7                | 6                | 0              | -2.317658               | -1.891426 | 0.076356  |
| 8                | 8                | 0              | -3.020186               | -0.722865 | -0.243896 |
| 9                | 1                | 0              | -2.904209               | -2.473548 | 0.802771  |
| 10               | 6                | 0              | -2.112431               | -2.772556 | -1.173188 |
| 11               | 6                | 0              | -1.353529               | -2.031221 | -2.273674 |
| 12               | 1                | 0              | -1.531823               | -3.652741 | -0.860357 |
| 13               | 1                | 0              | -0.365225               | -1.692081 | -1.948053 |
| 14               | 1                | 0              | -1.219261               | -2.674588 | -3.148894 |
| 15               | 30               | 0              | -5.122985               | -0.717754 | -0.157995 |
| 16               | 6                | 0              | -5.598866               | -1.644346 | 1.521935  |
| 17               | 1                | 0              | -6.638027               | -1.345110 | 1.731797  |
| 18               | 6                | 0              | -4.744772               | -1.074114 | 2.661895  |
| 19               | 6                | 0              | -5.592826               | -3.176255 | 1.558573  |
| 20               | 1                | 0              | -4.867441               | 0.011556  | 2.761543  |
| 21               | 1                | 0              | -4.999236               | -1.514446 | 3.640574  |
| 22               | 1                | 0              | -3.671771               | -1.249659 | 2.506826  |
| 23               | 1                | 0              | -5.958792               | -3.570963 | 2.521311  |
| 24               | 1                | 0              | -6.225679               | -3.610432 | 0.774506  |
| 25               | 1                | 0              | -4.587367               | -3.596709 | 1.422049  |
| 26               | 1                | 0              | -1.921233               | -1.150660 | -2.591016 |
| 27               | 6                | 0              | -3.469650               | -3.250644 | -1.687361 |

|    |    |   |           |           |           |
|----|----|---|-----------|-----------|-----------|
| 28 | 1  | 0 | -4.061311 | -2.401007 | -2.044071 |
| 29 | 1  | 0 | -3.351152 | -3.943467 | -2.526246 |
| 30 | 1  | 0 | -4.040683 | -3.762205 | -0.906034 |
| 31 | 6  | 0 | 2.428291  | -1.225669 | 1.600349  |
| 32 | 6  | 0 | 3.232330  | -1.899948 | 0.686652  |
| 33 | 6  | 0 | 2.979840  | -0.536802 | 2.674959  |
| 34 | 6  | 0 | 4.609469  | -1.910415 | 0.864931  |
| 35 | 1  | 0 | 2.798296  | -2.387523 | -0.178743 |
| 36 | 6  | 0 | 4.358313  | -0.530815 | 2.842833  |
| 37 | 1  | 0 | 2.335527  | -0.007432 | 3.366963  |
| 38 | 6  | 0 | 5.159579  | -1.222654 | 1.940338  |
| 39 | 1  | 0 | 5.247769  | -2.430802 | 0.160844  |
| 40 | 1  | 0 | 4.803261  | -0.002017 | 3.677573  |
| 41 | 17 | 0 | 6.893946  | -1.217580 | 2.154290  |
| 42 | 30 | 0 | -2.040012 | 0.872167  | -0.177963 |
| 43 | 6  | 0 | -0.449937 | 3.560998  | 1.692487  |
| 44 | 1  | 0 | -0.471222 | 2.523878  | 2.040677  |
| 45 | 6  | 0 | 0.913188  | 4.182200  | 1.873396  |
| 46 | 1  | 0 | 0.987687  | 5.155956  | 1.373820  |
| 47 | 1  | 0 | 1.121644  | 4.352403  | 2.938104  |
| 48 | 1  | 0 | 1.708943  | 3.532043  | 1.495604  |
| 49 | 6  | 0 | -1.604089 | 4.355090  | 2.252688  |
| 50 | 1  | 0 | -1.605514 | 5.381761  | 1.866782  |
| 51 | 1  | 0 | -2.551886 | 3.885387  | 1.974613  |
| 52 | 1  | 0 | -1.556238 | 4.412663  | 3.348267  |
| 53 | 6  | 0 | -5.534999 | 0.606869  | -1.562810 |
| 54 | 1  | 0 | -6.528467 | 0.390390  | -1.985218 |
| 55 | 6  | 0 | -5.617530 | 2.008740  | -0.938890 |
| 56 | 1  | 0 | -6.374687 | 2.064610  | -0.146708 |
| 57 | 1  | 0 | -4.662616 | 2.322089  | -0.495638 |
| 58 | 1  | 0 | -5.873521 | 2.781236  | -1.682597 |
| 59 | 6  | 0 | -4.552770 | 0.617171  | -2.736335 |
| 60 | 1  | 0 | -4.527081 | -0.343768 | -3.265748 |
| 61 | 1  | 0 | -4.792097 | 1.392915  | -3.481885 |
| 62 | 1  | 0 | -3.524994 | 0.817497  | -2.404773 |
| 63 | 8  | 0 | -2.140758 | 2.718843  | -0.283649 |
| 64 | 6  | 0 | -0.927995 | 3.312000  | -0.213214 |
| 65 | 1  | 0 | -0.914529 | 4.343911  | -0.585907 |
| 66 | 6  | 0 | 0.177777  | 2.477036  | -0.773776 |

|    |    |   |           |           |           |
|----|----|---|-----------|-----------|-----------|
| 67 | 6  | 0 | 1.537611  | 2.613306  | -0.940531 |
| 68 | 7  | 0 | -0.116768 | 1.189625  | -1.090191 |
| 69 | 1  | 0 | 2.206580  | 3.452484  | -0.850875 |
| 70 | 7  | 0 | 0.952256  | 0.517974  | -1.402091 |
| 71 | 7  | 0 | 1.963590  | 1.379304  | -1.318660 |
| 72 | 6  | 0 | 3.292726  | 0.917885  | -1.535027 |
| 73 | 6  | 0 | 4.326282  | 1.403460  | -0.740848 |
| 74 | 6  | 0 | 3.522094  | -0.049596 | -2.508091 |
| 75 | 6  | 0 | 5.615778  | 0.922219  | -0.929620 |
| 76 | 1  | 0 | 4.127641  | 2.130461  | 0.038620  |
| 77 | 6  | 0 | 4.807869  | -0.540693 | -2.687981 |
| 78 | 1  | 0 | 2.699965  | -0.411891 | -3.114254 |
| 79 | 6  | 0 | 5.842535  | -0.049130 | -1.898137 |
| 80 | 1  | 0 | 6.430236  | 1.284135  | -0.313347 |
| 81 | 1  | 0 | 5.004414  | -1.293815 | -3.441989 |
| 82 | 17 | 0 | 7.456917  | -0.679195 | -2.118665 |

---

TS1(R)

Sum of electronic and zero-point Energies = -6123.730920

Sum of electronic and thermal Energies = -6123.685577

Sum of electronic and thermal Enthalpies = -6123.684633

Sum of electronic and thermal Free Energies = -6123.810825

Standard orientation:

| Center<br>Number | Atomic<br>Number | Atomic<br>Type | Coordinates (Angstroms) |           |           |
|------------------|------------------|----------------|-------------------------|-----------|-----------|
|                  |                  |                | X                       | Y         | Z         |
| 1                | 6                | 0              | 0.092436                | -1.759622 | 1.423346  |
| 2                | 6                | 0              | 1.140141                | -0.894402 | 1.195758  |
| 3                | 7                | 0              | -1.017855               | -1.041031 | 1.156049  |
| 4                | 1                | 0              | 0.045263                | -2.780069 | 1.766393  |
| 5                | 7                | 0              | -0.708306               | 0.196393  | 0.771787  |
| 6                | 7                | 0              | 0.598853                | 0.281300  | 0.812231  |
| 7                | 6                | 0              | 2.647509                | -0.997081 | 1.327298  |
| 8                | 8                | 0              | 3.235497                | 0.204346  | 1.003473  |
| 9                | 1                | 0              | 2.966991                | -1.787882 | 0.623933  |
| 10               | 6                | 0              | 3.030480                | -1.482014 | 2.748623  |
| 11               | 6                | 0              | 2.600749                | -0.480600 | 3.819848  |
| 12               | 1                | 0              | 2.502572                | -2.431718 | 2.922042  |
| 13               | 1                | 0              | 1.520246                | -0.294486 | 3.798591  |
| 14               | 1                | 0              | 2.850992                | -0.843912 | 4.821128  |
| 15               | 30               | 0              | 2.185532                | 1.732797  | 1.062213  |
| 16               | 6                | 0              | 2.338443                | 3.582881  | 1.662174  |
| 17               | 1                | 0              | 1.380016                | 3.871191  | 2.113240  |
| 18               | 6                | 0              | 2.644020                | 4.592882  | 0.554148  |
| 19               | 6                | 0              | 3.400657                | 3.659884  | 2.767058  |
| 20               | 1                | 0              | 1.875236                | 4.597619  | -0.225243 |
| 21               | 1                | 0              | 2.713574                | 5.617911  | 0.949472  |
| 22               | 1                | 0              | 3.603265                | 4.381878  | 0.063364  |
| 23               | 1                | 0              | 3.506992                | 4.683458  | 3.158738  |
| 24               | 1                | 0              | 3.157162                | 3.015828  | 3.620788  |
| 25               | 1                | 0              | 4.390711                | 3.352653  | 2.407079  |
| 26               | 1                | 0              | 3.114555                | 0.475238  | 3.674720  |
| 27               | 6                | 0              | 4.533251                | -1.744612 | 2.809585  |

|    |    |   |           |           |           |
|----|----|---|-----------|-----------|-----------|
| 28 | 1  | 0 | 5.083118  | -0.819064 | 2.617630  |
| 29 | 1  | 0 | 4.828414  | -2.125418 | 3.792742  |
| 30 | 1  | 0 | 4.839639  | -2.478517 | 2.056075  |
| 31 | 6  | 0 | -2.374703 | -1.439096 | 1.334365  |
| 32 | 6  | 0 | -3.236264 | -0.588958 | 2.017438  |
| 33 | 6  | 0 | -2.793069 | -2.671988 | 0.850057  |
| 34 | 6  | 0 | -4.553391 | -0.979277 | 2.217990  |
| 35 | 1  | 0 | -2.876904 | 0.360683  | 2.397883  |
| 36 | 6  | 0 | -4.106696 | -3.068463 | 1.062525  |
| 37 | 1  | 0 | -2.112691 | -3.295634 | 0.281891  |
| 38 | 6  | 0 | -4.972543 | -2.217121 | 1.741410  |
| 39 | 1  | 0 | -5.242342 | -0.330540 | 2.745524  |
| 40 | 1  | 0 | -4.459069 | -4.019961 | 0.682853  |
| 41 | 17 | 0 | -6.629153 | -2.708891 | 1.990375  |
| 42 | 30 | 0 | -1.695413 | 1.604417  | -0.878878 |
| 43 | 6  | 0 | -0.561919 | 3.173807  | -0.605799 |
| 44 | 1  | 0 | 0.465302  | 2.825690  | -0.423877 |
| 45 | 6  | 0 | -0.532990 | 4.128637  | -1.799540 |
| 46 | 1  | 0 | -1.534945 | 4.502018  | -2.041003 |
| 47 | 1  | 0 | 0.095260  | 5.011241  | -1.600157 |
| 48 | 1  | 0 | -0.159109 | 3.645039  | -2.706367 |
| 49 | 6  | 0 | -1.017007 | 3.907590  | 0.660225  |
| 50 | 1  | 0 | -2.050172 | 4.268716  | 0.565394  |
| 51 | 1  | 0 | -0.980091 | 3.262850  | 1.548098  |
| 52 | 1  | 0 | -0.395604 | 4.789984  | 0.874128  |
| 53 | 6  | 0 | -3.692490 | 1.187203  | -1.124808 |
| 54 | 1  | 0 | -3.556856 | 1.366355  | -0.029555 |
| 55 | 6  | 0 | -4.409473 | 2.425850  | -1.654759 |
| 56 | 1  | 0 | -3.831162 | 3.342610  | -1.492609 |
| 57 | 1  | 0 | -4.578432 | 2.353248  | -2.734222 |
| 58 | 1  | 0 | -5.386315 | 2.562629  | -1.171259 |
| 59 | 6  | 0 | -4.580032 | -0.053409 | -1.160531 |
| 60 | 1  | 0 | -4.022577 | -0.971061 | -0.959147 |
| 61 | 1  | 0 | -5.396340 | 0.018933  | -0.431233 |
| 62 | 1  | 0 | -5.056829 | -0.174140 | -2.141092 |
| 63 | 8  | 0 | -2.111401 | 1.788403  | -3.461688 |
| 64 | 6  | 0 | -2.520568 | 0.749281  | -2.906183 |
| 65 | 1  | 0 | -3.472937 | 0.281570  | -3.185568 |
| 66 | 6  | 0 | -1.470239 | -0.256483 | -2.507797 |

|    |    |   |           |           |           |
|----|----|---|-----------|-----------|-----------|
| 67 | 6  | 0 | -0.110737 | -0.117717 | -2.685244 |
| 68 | 7  | 0 | -1.700047 | -1.478514 | -1.948913 |
| 69 | 1  | 0 | 0.475277  | 0.667658  | -3.133245 |
| 70 | 7  | 0 | -0.570178 | -2.078936 | -1.755863 |
| 71 | 7  | 0 | 0.410544  | -1.264714 | -2.196802 |
| 72 | 6  | 0 | 1.771895  | -1.656817 | -2.087429 |
| 73 | 6  | 0 | 2.088618  | -3.013038 | -2.058915 |
| 74 | 6  | 0 | 2.760039  | -0.686305 | -1.978508 |
| 75 | 6  | 0 | 3.413324  | -3.398217 | -1.912055 |
| 76 | 1  | 0 | 1.304515  | -3.755017 | -2.147361 |
| 77 | 6  | 0 | 4.088044  | -1.070277 | -1.844252 |
| 78 | 1  | 0 | 2.504237  | 0.366267  | -1.959487 |
| 79 | 6  | 0 | 4.400999  | -2.422301 | -1.806553 |
| 80 | 1  | 0 | 3.675761  | -4.449436 | -1.884585 |
| 81 | 1  | 0 | 4.860647  | -0.320486 | -1.730570 |
| 82 | 17 | 0 | 6.067642  | -2.912587 | -1.610712 |

---

## 7(S).7(R)

Sum of electronic and zero-point Energies= -6123.812489  
 Sum of electronic and thermal Energies= -6123.767385  
 Sum of electronic and thermal Enthalpies= -6123.766440  
 Sum of electronic and thermal Free Energies= -6123.894865

Standard orientation:

| Center<br>Number | Atomic<br>Number | Atomic<br>Type | Coordinates (Angstroms) |           |           |
|------------------|------------------|----------------|-------------------------|-----------|-----------|
|                  |                  |                | X                       | Y         | Z         |
| 1                | 6                | 0              | -0.278978               | -1.081912 | 1.735384  |
| 2                | 6                | 0              | 0.643826                | -0.103591 | 1.468849  |
| 3                | 7                | 0              | -1.478201               | -0.503781 | 1.477037  |
| 4                | 1                | 0              | -0.179875               | -2.098440 | 2.076109  |
| 5                | 7                | 0              | -1.331862               | 0.757963  | 1.073844  |
| 6                | 7                | 0              | -0.048604               | 0.993313  | 1.073413  |
| 7                | 6                | 0              | 2.148239                | -0.004184 | 1.571136  |
| 8                | 8                | 0              | 2.592529                | 1.090201  | 0.849767  |
| 9                | 1                | 0              | 2.559172                | -0.935779 | 1.152373  |
| 10               | 6                | 0              | 2.598005                | 0.023755  | 3.056942  |
| 11               | 6                | 0              | 2.098970                | 1.264689  | 3.796088  |
| 12               | 1                | 0              | 2.163106                | -0.865058 | 3.536493  |
| 13               | 1                | 0              | 1.009078                | 1.370785  | 3.739235  |
| 14               | 1                | 0              | 2.364542                | 1.218866  | 4.856621  |
| 15               | 30               | 0              | 1.421115                | 2.547190  | 0.866157  |
| 16               | 6                | 0              | 1.250434                | 4.478738  | 1.074533  |
| 17               | 1                | 0              | 0.186617                | 4.731675  | 0.960088  |
| 18               | 6                | 0              | 2.025174                | 5.272670  | 0.018248  |
| 19               | 6                | 0              | 1.672139                | 4.913489  | 2.483635  |
| 20               | 1                | 0              | 1.716986                | 5.020868  | -1.003045 |
| 21               | 1                | 0              | 1.883033                | 6.357674  | 0.138840  |
| 22               | 1                | 0              | 3.104665                | 5.085794  | 0.084529  |
| 23               | 1                | 0              | 1.535007                | 5.995569  | 2.632495  |
| 24               | 1                | 0              | 1.095992                | 4.406976  | 3.267286  |
| 25               | 1                | 0              | 2.732386                | 4.701618  | 2.673662  |
| 26               | 1                | 0              | 2.556428                | 2.172547  | 3.388055  |
| 27               | 6                | 0              | 4.120011                | -0.079932 | 3.127201  |

|    |    |   |           |           |           |
|----|----|---|-----------|-----------|-----------|
| 28 | 1  | 0 | 4.578336  | 0.770846  | 2.614495  |
| 29 | 1  | 0 | 4.469885  | -0.086526 | 4.164608  |
| 30 | 1  | 0 | 4.478632  | -0.995893 | 2.644913  |
| 31 | 6  | 0 | -2.775459 | -1.076835 | 1.609725  |
| 32 | 6  | 0 | -3.860380 | -0.249079 | 1.880616  |
| 33 | 6  | 0 | -2.931922 | -2.450725 | 1.466409  |
| 34 | 6  | 0 | -5.123754 | -0.808633 | 2.015046  |
| 35 | 1  | 0 | -3.716290 | 0.818942  | 1.989891  |
| 36 | 6  | 0 | -4.192724 | -3.012169 | 1.620598  |
| 37 | 1  | 0 | -2.092636 | -3.075918 | 1.184882  |
| 38 | 6  | 0 | -5.276562 | -2.186085 | 1.892667  |
| 39 | 1  | 0 | -5.979243 | -0.178467 | 2.227276  |
| 40 | 1  | 0 | -4.331179 | -4.080049 | 1.501987  |
| 41 | 17 | 0 | -6.866905 | -2.889336 | 2.073707  |
| 42 | 30 | 0 | -1.055504 | 1.774081  | -2.460225 |
| 43 | 6  | 0 | -0.970968 | 3.462543  | -1.569704 |
| 44 | 1  | 0 | -0.122557 | 3.410014  | -0.878446 |
| 45 | 6  | 0 | -0.723162 | 4.632973  | -2.524271 |
| 46 | 1  | 0 | -1.532905 | 4.740090  | -3.256892 |
| 47 | 1  | 0 | -0.660936 | 5.584303  | -1.976294 |
| 48 | 1  | 0 | 0.210418  | 4.523116  | -3.087730 |
| 49 | 6  | 0 | -2.220122 | 3.701461  | -0.717064 |
| 50 | 1  | 0 | -3.131135 | 3.754734  | -1.327015 |
| 51 | 1  | 0 | -2.367812 | 2.910999  | 0.026400  |
| 52 | 1  | 0 | -2.148448 | 4.655230  | -0.174075 |
| 53 | 6  | 0 | -3.027136 | -0.499061 | -1.966851 |
| 54 | 1  | 0 | -2.652719 | -0.131077 | -1.000331 |
| 55 | 6  | 0 | -3.898842 | 0.596473  | -2.585975 |
| 56 | 1  | 0 | -3.401392 | 1.570736  | -2.628360 |
| 57 | 1  | 0 | -4.194985 | 0.338175  | -3.608242 |
| 58 | 1  | 0 | -4.806723 | 0.732632  | -1.990504 |
| 59 | 6  | 0 | -3.882052 | -1.744361 | -1.723252 |
| 60 | 1  | 0 | -3.283168 | -2.583749 | -1.368071 |
| 61 | 1  | 0 | -4.661165 | -1.540248 | -0.981960 |
| 62 | 1  | 0 | -4.377764 | -2.047504 | -2.653434 |
| 63 | 8  | 0 | -1.200821 | 0.281014  | -3.443982 |
| 64 | 6  | 0 | -1.793886 | -0.832679 | -2.847958 |
| 65 | 1  | 0 | -2.151930 | -1.496373 | -3.653240 |
| 66 | 6  | 0 | -0.713981 | -1.578173 | -2.085390 |



|    |    |   |           |           |           |
|----|----|---|-----------|-----------|-----------|
| 67 | 6  | 0 | 0.638805  | -1.350969 | -2.193141 |
| 68 | 7  | 0 | -0.889837 | -2.602145 | -1.204494 |
| 69 | 1  | 0 | 1.213464  | -0.676822 | -2.805137 |
| 70 | 7  | 0 | 0.267415  | -3.015307 | -0.775074 |
| 71 | 7  | 0 | 1.207531  | -2.263346 | -1.370955 |
| 72 | 6  | 0 | 2.588742  | -2.512177 | -1.150939 |
| 73 | 6  | 0 | 3.028542  | -3.826322 | -1.024114 |
| 74 | 6  | 0 | 3.474949  | -1.442882 | -1.057373 |
| 75 | 6  | 0 | 4.375839  | -4.076406 | -0.799864 |
| 76 | 1  | 0 | 2.318234  | -4.641108 | -1.100313 |
| 77 | 6  | 0 | 4.825184  | -1.693122 | -0.845733 |
| 78 | 1  | 0 | 3.114970  | -0.417865 | -1.075996 |
| 79 | 6  | 0 | 5.261450  | -3.006993 | -0.719112 |
| 80 | 1  | 0 | 4.734966  | -5.093683 | -0.697145 |
| 81 | 1  | 0 | 5.522930  | -0.869182 | -0.754015 |
| 82 | 17 | 0 | 6.959532  | -3.323380 | -0.439509 |

---

Sum of electronic and zero-point Energies = -6123.864057

Sum of electronic and thermal Energies = -6123.818808

Sum of electronic and thermal Enthalpies = -6123.817864

Sum of electronic and thermal Free Energies = -6123.947982

Standard orientation:

| Center<br>Number | Atomic<br>Number | Atomic<br>Type | Coordinates (Angstroms) |           |           |
|------------------|------------------|----------------|-------------------------|-----------|-----------|
|                  |                  |                | X                       | Y         | Z         |
| 1                | 6                | 0              | -3.747414               | 1.342104  | 0.910051  |
| 2                | 6                | 0              | -2.461685               | 1.485768  | 0.458563  |
| 3                | 7                | 0              | -4.381385               | 0.644489  | -0.070386 |
| 4                | 1                | 0              | -4.233219               | 1.633462  | 1.826454  |
| 5                | 7                | 0              | -3.552106               | 0.362768  | -1.074812 |
| 6                | 7                | 0              | -2.402246               | 0.870686  | -0.751193 |
| 7                | 6                | 0              | -1.187316               | 2.095223  | 1.000206  |
| 8                | 8                | 0              | -0.115253               | 1.372698  | 0.479450  |
| 9                | 30               | 0              | 0.301282                | -0.374246 | 1.314306  |
| 10               | 6                | 0              | -0.321292               | -0.982504 | 3.077884  |
| 11               | 1                | 0              | -1.397771               | -0.768362 | 3.167752  |
| 12               | 6                | 0              | 0.383668                | -0.240657 | 4.218883  |
| 13               | 1                | 0              | 0.224577                | 0.843796  | 4.166078  |
| 14               | 1                | 0              | 0.041316                | -0.571390 | 5.213680  |
| 15               | 1                | 0              | 1.470223                | -0.399952 | 4.192126  |
| 16               | 6                | 0              | -0.149570               | -2.495865 | 3.245181  |
| 17               | 1                | 0              | -0.492366               | -2.855636 | 4.229878  |
| 18               | 1                | 0              | -0.706495               | -3.057920 | 2.485179  |
| 19               | 1                | 0              | 0.904706                | -2.792670 | 3.154007  |
| 20               | 8                | 0              | -0.053657               | -1.134015 | -0.554519 |
| 21               | 6                | 0              | 0.961691                | -1.951408 | -1.046554 |
| 22               | 30               | 0              | -0.413299               | 0.621210  | -1.409874 |
| 23               | 6                | 0              | 2.278846                | -1.410515 | -0.533744 |
| 24               | 6                | 0              | 0.368583                | 1.338218  | -3.066057 |
| 25               | 6                | 0              | 3.575819                | -1.408322 | -0.975554 |
| 26               | 7                | 0              | 2.265810                | -0.725659 | 0.639045  |
| 27               | 1                | 0              | -0.115940               | 0.871094  | -3.936494 |

|    |    |   |           |           |           |
|----|----|---|-----------|-----------|-----------|
| 28 | 6  | 0 | 1.870410  | 1.053328  | -3.178695 |
| 29 | 6  | 0 | 0.114297  | 2.846604  | -3.166427 |
| 30 | 7  | 0 | 4.261259  | -0.713398 | -0.029266 |
| 31 | 1  | 0 | 4.050727  | -1.836102 | -1.843060 |
| 32 | 7  | 0 | 3.453848  | -0.302129 | 0.948513  |
| 33 | 1  | 0 | 2.080089  | -0.021999 | -3.233066 |
| 34 | 1  | 0 | 2.316290  | 1.514332  | -4.076001 |
| 35 | 1  | 0 | 2.423848  | 1.445519  | -2.314722 |
| 36 | 1  | 0 | 0.536514  | 3.284424  | -4.086242 |
| 37 | 1  | 0 | -0.957112 | 3.083209  | -3.159156 |
| 38 | 1  | 0 | 0.568487  | 3.387996  | -2.325387 |
| 39 | 6  | 0 | -5.725602 | 0.178756  | -0.102920 |
| 40 | 6  | 0 | -6.721060 | 0.898374  | 0.549142  |
| 41 | 6  | 0 | -6.017524 | -0.999520 | -0.783656 |
| 42 | 6  | 0 | -8.027880 | 0.427092  | 0.532660  |
| 43 | 1  | 0 | -6.491629 | 1.828469  | 1.057189  |
| 44 | 6  | 0 | -7.325594 | -1.462667 | -0.813181 |
| 45 | 1  | 0 | -5.226257 | -1.547331 | -1.280993 |
| 46 | 6  | 0 | -8.317976 | -0.748373 | -0.150107 |
| 47 | 1  | 0 | -8.813349 | 0.977506  | 1.036909  |
| 48 | 1  | 0 | -7.566630 | -2.379188 | -1.338737 |
| 49 | 17 | 0 | -9.962843 | -1.339386 | -0.175615 |
| 50 | 6  | 0 | 5.647979  | -0.396033 | 0.004992  |
| 51 | 6  | 0 | 6.310795  | -0.382716 | 1.227799  |
| 52 | 6  | 0 | 6.314416  | -0.106501 | -1.180798 |
| 53 | 6  | 0 | 7.664206  | -0.075272 | 1.264594  |
| 54 | 1  | 0 | 5.771053  | -0.609739 | 2.139565  |
| 55 | 6  | 0 | 7.672220  | 0.185340  | -1.146657 |
| 56 | 1  | 0 | 5.780046  | -0.085428 | -2.124284 |
| 57 | 6  | 0 | 8.333233  | 0.198619  | 0.076227  |
| 58 | 1  | 0 | 8.194153  | -0.058758 | 2.209622  |
| 59 | 1  | 0 | 8.204535  | 0.412984  | -2.062650 |
| 60 | 17 | 0 | 10.040695 | 0.570695  | 0.121074  |
| 61 | 6  | 0 | -1.071437 | 3.591354  | 0.637658  |
| 62 | 1  | 0 | -1.086318 | 3.650037  | -0.459981 |
| 63 | 6  | 0 | 0.269216  | 4.129345  | 1.133361  |
| 64 | 1  | 0 | 0.411562  | 5.170646  | 0.826951  |
| 65 | 1  | 0 | 0.320364  | 4.093365  | 2.229032  |
| 66 | 1  | 0 | 1.093403  | 3.532535  | 0.738062  |

|    |   |   |           |           |           |
|----|---|---|-----------|-----------|-----------|
| 67 | 6 | 0 | -2.236681 | 4.412158  | 1.189971  |
| 68 | 1 | 0 | -2.092383 | 5.475862  | 0.977747  |
| 69 | 1 | 0 | -3.194676 | 4.117407  | 0.750468  |
| 70 | 1 | 0 | -2.314337 | 4.301765  | 2.278951  |
| 71 | 1 | 0 | -1.217971 | 2.018595  | 2.100832  |
| 72 | 1 | 0 | 0.988437  | -1.925236 | -2.149426 |
| 73 | 6 | 0 | 0.745348  | -3.419251 | -0.616495 |
| 74 | 1 | 0 | 0.792700  | -3.435175 | 0.481793  |
| 75 | 6 | 0 | -0.646257 | -3.878740 | -1.046197 |
| 76 | 1 | 0 | -0.845972 | -4.895506 | -0.692782 |
| 77 | 1 | 0 | -1.412812 | -3.211498 | -0.647428 |
| 78 | 1 | 0 | -0.734620 | -3.881240 | -2.139988 |
| 79 | 6 | 0 | 1.827984  | -4.346646 | -1.168280 |
| 80 | 1 | 0 | 1.873168  | -4.290043 | -2.263201 |
| 81 | 1 | 0 | 2.820265  | -4.104441 | -0.775155 |
| 82 | 1 | 0 | 1.616883  | -5.387097 | -0.903156 |

---

Sum of electronic and zero-point Energies = -6123.868490

Sum of electronic and thermal Energies = -6123.822956

Sum of electronic and thermal Enthalpies = -6123.822012

Sum of electronic and thermal Free Energies = -6123.952680

Standard orientation:

| Center<br>Number | Atomic<br>Number | Atomic<br>Type | Coordinates (Angstroms) |           |           |
|------------------|------------------|----------------|-------------------------|-----------|-----------|
|                  |                  |                | X                       | Y         | Z         |
| 1                | 6                | 0              | -3.747414               | 1.342104  | 0.910051  |
| 2                | 6                | 0              | -2.461685               | 1.485768  | 0.458563  |
| 3                | 7                | 0              | -4.381385               | 0.644489  | -0.070386 |
| 4                | 1                | 0              | -4.233219               | 1.633462  | 1.826454  |
| 5                | 7                | 0              | -3.552106               | 0.362768  | -1.074812 |
| 6                | 7                | 0              | -2.402246               | 0.870686  | -0.751193 |
| 7                | 6                | 0              | -1.187316               | 2.095223  | 1.000206  |
| 8                | 8                | 0              | -0.115253               | 1.372698  | 0.479450  |
| 9                | 30               | 0              | 0.301282                | -0.374246 | 1.314306  |
| 10               | 6                | 0              | -0.321292               | -0.982504 | 3.077884  |
| 11               | 1                | 0              | -1.397771               | -0.768362 | 3.167752  |
| 12               | 6                | 0              | 0.383668                | -0.240657 | 4.218883  |
| 13               | 1                | 0              | 0.224577                | 0.843796  | 4.166078  |
| 14               | 1                | 0              | 0.041316                | -0.571390 | 5.213680  |
| 15               | 1                | 0              | 1.470223                | -0.399952 | 4.192126  |
| 16               | 6                | 0              | -0.149570               | -2.495865 | 3.245181  |
| 17               | 1                | 0              | -0.492366               | -2.855636 | 4.229878  |
| 18               | 1                | 0              | -0.706495               | -3.057920 | 2.485179  |
| 19               | 1                | 0              | 0.904706                | -2.792670 | 3.154007  |
| 20               | 8                | 0              | -0.053657               | -1.134015 | -0.554519 |
| 21               | 6                | 0              | 0.961691                | -1.951408 | -1.046554 |
| 22               | 30               | 0              | -0.413299               | 0.621210  | -1.409874 |
| 23               | 6                | 0              | 2.278846                | -1.410515 | -0.533744 |
| 24               | 6                | 0              | 0.368583                | 1.338218  | -3.066057 |
| 25               | 6                | 0              | 3.575819                | -1.408322 | -0.975554 |
| 26               | 7                | 0              | 2.265810                | -0.725659 | 0.639045  |
| 27               | 1                | 0              | -0.115940               | 0.871094  | -3.936494 |

|    |    |   |           |           |           |
|----|----|---|-----------|-----------|-----------|
| 28 | 6  | 0 | 1.870410  | 1.053328  | -3.178695 |
| 29 | 6  | 0 | 0.114297  | 2.846604  | -3.166427 |
| 30 | 7  | 0 | 4.261259  | -0.713398 | -0.029266 |
| 31 | 1  | 0 | 4.050727  | -1.836102 | -1.843060 |
| 32 | 7  | 0 | 3.453848  | -0.302129 | 0.948513  |
| 33 | 1  | 0 | 2.080089  | -0.021999 | -3.233066 |
| 34 | 1  | 0 | 2.316290  | 1.514332  | -4.076001 |
| 35 | 1  | 0 | 2.423848  | 1.445519  | -2.314722 |
| 36 | 1  | 0 | 0.536514  | 3.284424  | -4.086242 |
| 37 | 1  | 0 | -0.957112 | 3.083209  | -3.159156 |
| 38 | 1  | 0 | 0.568487  | 3.387996  | -2.325387 |
| 39 | 6  | 0 | -5.725602 | 0.178756  | -0.102920 |
| 40 | 6  | 0 | -6.721060 | 0.898374  | 0.549142  |
| 41 | 6  | 0 | -6.017524 | -0.999520 | -0.783656 |
| 42 | 6  | 0 | -8.027880 | 0.427092  | 0.532660  |
| 43 | 1  | 0 | -6.491629 | 1.828469  | 1.057189  |
| 44 | 6  | 0 | -7.325594 | -1.462667 | -0.813181 |
| 45 | 1  | 0 | -5.226257 | -1.547331 | -1.280993 |
| 46 | 6  | 0 | -8.317976 | -0.748373 | -0.150107 |
| 47 | 1  | 0 | -8.813349 | 0.977506  | 1.036909  |
| 48 | 1  | 0 | -7.566630 | -2.379188 | -1.338737 |
| 49 | 17 | 0 | -9.962843 | -1.339386 | -0.175615 |
| 50 | 6  | 0 | 5.647979  | -0.396033 | 0.004992  |
| 51 | 6  | 0 | 6.310795  | -0.382716 | 1.227799  |
| 52 | 6  | 0 | 6.314416  | -0.106501 | -1.180798 |
| 53 | 6  | 0 | 7.664206  | -0.075272 | 1.264594  |
| 54 | 1  | 0 | 5.771053  | -0.609739 | 2.139565  |
| 55 | 6  | 0 | 7.672220  | 0.185340  | -1.146657 |
| 56 | 1  | 0 | 5.780046  | -0.085428 | -2.124284 |
| 57 | 6  | 0 | 8.333233  | 0.198619  | 0.076227  |
| 58 | 1  | 0 | 8.194153  | -0.058758 | 2.209622  |
| 59 | 1  | 0 | 8.204535  | 0.412984  | -2.062650 |
| 60 | 17 | 0 | 10.040695 | 0.570695  | 0.121074  |
| 61 | 6  | 0 | -1.071437 | 3.591354  | 0.637658  |
| 62 | 1  | 0 | -1.086318 | 3.650037  | -0.459981 |
| 63 | 6  | 0 | 0.269216  | 4.129345  | 1.133361  |
| 64 | 1  | 0 | 0.411562  | 5.170646  | 0.826951  |
| 65 | 1  | 0 | 0.320364  | 4.093365  | 2.229032  |
| 66 | 1  | 0 | 1.093403  | 3.532535  | 0.738062  |

|    |   |   |           |           |           |
|----|---|---|-----------|-----------|-----------|
| 67 | 6 | 0 | -2.236681 | 4.412158  | 1.189971  |
| 68 | 1 | 0 | -2.092383 | 5.475862  | 0.977747  |
| 69 | 1 | 0 | -3.194676 | 4.117407  | 0.750468  |
| 70 | 1 | 0 | -2.314337 | 4.301765  | 2.278951  |
| 71 | 1 | 0 | -1.217971 | 2.018595  | 2.100832  |
| 72 | 1 | 0 | 0.988437  | -1.925236 | -2.149426 |
| 73 | 6 | 0 | 0.745348  | -3.419251 | -0.616495 |
| 74 | 1 | 0 | 0.792700  | -3.435175 | 0.481793  |
| 75 | 6 | 0 | -0.646257 | -3.878740 | -1.046197 |
| 76 | 1 | 0 | -0.845972 | -4.895506 | -0.692782 |
| 77 | 1 | 0 | -1.412812 | -3.211498 | -0.647428 |
| 78 | 1 | 0 | -0.734620 | -3.881240 | -2.139988 |
| 79 | 6 | 0 | 1.827984  | -4.346646 | -1.168280 |
| 80 | 1 | 0 | 1.873168  | -4.290043 | -2.263201 |
| 81 | 1 | 0 | 2.820265  | -4.104441 | -0.775155 |
| 82 | 1 | 0 | 1.616883  | -5.387097 | -0.903156 |

---

Sum of electronic and zero-point Energies = -8139.843464

Sum of electronic and thermal Energies = -8139.786398

Sum of electronic and thermal Enthalpies = -8139.785453

Sum of electronic and thermal Free Energies = -8139.939256

Standard orientation:

| -----  |        |        |                         |           |           |  |
|--------|--------|--------|-------------------------|-----------|-----------|--|
| Center | Atomic | Atomic | Coordinates (Angstroms) |           |           |  |
| Number | Number | Type   | X                       | Y         | Z         |  |
| -----  |        |        |                         |           |           |  |
| 1      | 6      | 0      | -4.558419               | 1.043631  | 1.110164  |  |
| 2      | 6      | 0      | -3.215725               | 0.826289  | 0.929161  |  |
| 3      | 7      | 0      | -5.149609               | 0.467691  | 0.030602  |  |
| 4      | 1      | 0      | -5.120109               | 1.513058  | 1.900453  |  |
| 5      | 7      | 0      | -4.241902               | -0.082375 | -0.778074 |  |
| 6      | 7      | 0      | -3.084765               | 0.133935  | -0.231797 |  |
| 7      | 6      | 0      | -1.964069               | 1.160554  | 1.714314  |  |
| 8      | 8      | 0      | -0.925741               | 0.375350  | 1.216065  |  |
| 9      | 30     | 0      | -0.461608               | -1.326407 | 2.024989  |  |
| 10     | 6      | 0      | -0.106211               | -1.808992 | 3.876808  |  |
| 11     | 1      | 0      | 0.577754                | -2.669702 | 3.901432  |  |
| 12     | 6      | 0      | -1.383817               | -2.222756 | 4.615642  |  |
| 13     | 1      | 0      | -1.862599               | -3.097420 | 4.159812  |  |
| 14     | 1      | 0      | -1.182426               | -2.474207 | 5.668585  |  |
| 15     | 1      | 0      | -2.130373               | -1.417481 | 4.626148  |  |
| 16     | 6      | 0      | 0.592550                | -0.657409 | 4.608541  |  |
| 17     | 1      | 0      | 0.781836                | -0.896925 | 5.666956  |  |
| 18     | 1      | 0      | 1.557910                | -0.408813 | 4.154705  |  |
| 19     | 1      | 0      | -0.006096               | 0.262708  | 4.595099  |  |
| 20     | 1      | 0      | -2.166167               | 0.919928  | 2.771412  |  |
| 21     | 6      | 0      | -1.583804               | 2.657579  | 1.668164  |  |
| 22     | 6      | 0      | -2.696754               | 3.557737  | 2.203076  |  |
| 23     | 1      | 0      | -0.722577               | 2.737615  | 2.343004  |  |
| 24     | 1      | 0      | -2.328409               | 4.578612  | 2.340978  |  |
| 25     | 1      | 0      | -3.540838               | 3.608011  | 1.505834  |  |
| 26     | 8      | 0      | -0.704736               | -2.096389 | 0.260852  |  |
| 27     | 6      | 0      | 0.313035                | -2.943812 | -0.183800 |  |



28 30 0 -1.005032 -0.313500 -0.710675  
29 6 0 1.607775 -2.157566 -0.207382  
30 1 0 0.442406 -3.780765 0.524690  
31 6 0 -0.037190 -3.563854 -1.552490  
32 6 0 -0.510321 0.152392 -2.557388  
33 6 0 2.937299 -2.511709 -0.168888  
34 7 0 1.549469 -0.802245 -0.253507  
35 6 0 1.037455 -4.537950 -2.034353  
36 1 0 0.149221 -0.654937 -2.912998  
37 6 0 0.306067 1.442283 -2.662368  
38 6 0 -1.715804 0.203028 -3.499092  
39 7 0 3.607651 -1.336228 -0.203073  
40 1 0 3.442829 -3.460468 -0.091065  
41 7 0 2.747116 -0.316086 -0.257828  
42 1 0 0.730971 -5.011552 -2.971664  
43 1 0 1.994098 -4.040508 -2.220069  
44 1 0 1.148555 1.447192 -1.959259  
45 1 0 0.730486 1.591641 -3.667916  
46 1 0 -0.300630 2.330076 -2.441829  
47 1 0 -1.434228 0.435766 -4.539375  
48 1 0 -2.260496 -0.749365 -3.518083  
49 1 0 -2.438164 0.970214 -3.189321  
50 1 0 1.203635 -5.337248 -1.300791  
51 1 0 -0.110981 -2.738120 -2.271233  
52 6 0 -1.399721 -4.249835 -1.464180  
53 1 0 -1.379338 -5.063577 -0.728437  
54 1 0 -2.173931 -3.542162 -1.160853  
55 1 0 -1.680394 -4.678670 -2.431330  
56 1 0 -3.072420 3.209585 3.172832  
57 6 0 -1.125820 3.082678 0.276365  
58 1 0 -1.909754 2.921016 -0.474479  
59 1 0 -0.868388 4.146544 0.262609  
60 1 0 -0.239994 2.519920 -0.026524  
61 6 0 -6.534670 0.378886 -0.282038  
62 6 0 -7.401306 1.382044 0.138600  
63 6 0 -6.997762 -0.717555 -1.003159  
64 6 0 -8.756618 1.279561 -0.148848  
65 1 0 -7.027565 2.249339 0.671521  
66 6 0 -8.349351 -0.812329 -1.304646

67 1 0 -6.304644 -1.485750 -1.323953  
68 6 0 -9.217281 0.183225 -0.868569  
69 1 0 -9.444268 2.052264 0.173969  
70 1 0 -8.724488 -1.660378 -1.865327  
71 17 0 -10.921561 0.055303 -1.235013  
72 6 0 5.007703 -1.092376 -0.158630  
73 6 0 5.490639 -0.096418 0.684583  
74 6 0 5.859667 -1.830590 -0.970811  
75 6 0 6.851575 0.176930 0.705092  
76 1 0 4.811480 0.455622 1.325563  
77 6 0 7.224340 -1.572268 -0.936144  
78 1 0 5.460935 -2.582577 -1.642831  
79 6 0 7.704714 -0.567385 -0.102928  
80 1 0 7.242993 0.954035 1.350776  
81 1 0 7.903080 -2.134786 -1.566038  
82 17 0 9.418221 -0.230701 -0.073392  
83 30 0 3.220870 1.901746 -0.585687  
84 6 0 4.003709 1.956117 -2.387672  
85 1 0 3.603468 1.102640 -2.957065  
86 6 0 2.728810 2.662989 1.164542  
87 1 0 1.945903 3.416663 0.984997  
88 6 0 5.532033 1.845655 -2.417498  
89 1 0 5.892029 0.891537 -2.017309  
90 1 0 5.933452 1.934112 -3.440546  
91 1 0 6.011865 2.639392 -1.828456  
92 6 0 3.567854 3.230324 -3.121756  
93 1 0 2.477290 3.330132 -3.176385  
94 1 0 3.946335 4.132555 -2.621753  
95 1 0 3.946194 3.265951 -4.156567  
96 6 0 3.922581 3.409853 1.776005  
97 1 0 4.315625 4.184962 1.106641  
98 1 0 3.667814 3.902396 2.728472  
99 1 0 4.760599 2.732907 1.998564  
100 6 0 2.152649 1.663163 2.170786  
101 1 0 2.854829 0.841908 2.382031  
102 1 0 1.932784 2.132297 3.144260  
103 1 0 1.226010 1.204189 1.809373

---



Sum of electronic and zero-point Energies = -9185.735773

Sum of electronic and thermal Energies = -9185.666053

Sum of electronic and thermal Enthalpies = -9185.665109

Sum of electronic and thermal Free Energies = -9185.848242

Standard orientation:

| -----  |           |           |                         |   |   |  |
|--------|-----------|-----------|-------------------------|---|---|--|
| Center | Atomic    | Atomic    | Coordinates (Angstroms) |   |   |  |
| Number | Number    | Type      | X                       | Y | Z |  |
| -----  |           |           |                         |   |   |  |
| 1 6 0  | -4.306984 | -0.707596 | 1.450933                |   |   |  |
| 2 6 0  | -2.974984 | -0.696473 | 1.119130                |   |   |  |
| 3 7 0  | -4.946282 | -1.073880 | 0.308988                |   |   |  |
| 4 1 0  | -4.825626 | -0.533912 | 2.378903                |   |   |  |
| 5 7 0  | -4.079712 | -1.287808 | -0.680376               |   |   |  |
| 6 7 0  | -2.900166 | -1.061335 | -0.186056               |   |   |  |
| 7 6 0  | -1.692343 | -0.401397 | 1.868765                |   |   |  |
| 8 8 0  | -0.612582 | -0.787692 | 1.075110                |   |   |  |
| 9 30 0 | 0.195073  | -2.537092 | 1.584516                |   |   |  |
| 10 6 0 | -0.183967 | -3.449497 | 3.294063                |   |   |  |
| 11 1 0 | 0.446991  | -4.351481 | 3.328847                |   |   |  |
| 12 6 0 | -1.637745 | -3.931940 | 3.372241                |   |   |  |
| 13 1 0 | -1.898206 | -4.590883 | 2.535364                |   |   |  |
| 14 1 0 | -1.842623 | -4.487914 | 4.302308                |   |   |  |
| 15 1 0 | -2.352406 | -3.097394 | 3.347089                |   |   |  |
| 16 6 0 | 0.171881  | -2.620463 | 4.532082                |   |   |  |
| 17 1 0 | -0.060026 | -3.152392 | 5.470013                |   |   |  |
| 18 1 0 | 1.237232  | -2.364349 | 4.560620                |   |   |  |
| 19 1 0 | -0.378549 | -1.670143 | 4.567015                |   |   |  |
| 20 1 0 | -1.719972 | -0.998165 | 2.795077                |   |   |  |
| 21 6 0 | -1.572110 | 1.073666  | 2.308689                |   |   |  |
| 22 6 0 | -2.645726 | 1.465395  | 3.323125                |   |   |  |
| 23 1 0 | -0.596740 | 1.120596  | 2.806989                |   |   |  |
| 24 1 0 | -2.415388 | 2.437213  | 3.770604                |   |   |  |
| 25 1 0 | -3.631151 | 1.556212  | 2.851088                |   |   |  |
| 26 8 0 | -0.423433 | -3.111957 | -0.287472               |   |   |  |
| 27 6 0 | 0.520413  | -3.876066 | -0.968588               |   |   |  |

28 30 0 -0.927242 -1.274572 -0.877483  
29 6 0 1.890968 -3.288863 -0.656827  
30 1 0 0.519880 -4.899684 -0.548363  
31 6 0 0.215323 -4.017199 -2.472307  
32 6 0 -0.536015 -0.342075 -2.568727  
33 6 0 3.140915 -3.263336 -1.224232  
34 7 0 1.996905 -2.613918 0.520321  
35 6 0 1.066676 -5.106981 -3.129135  
36 1 0 0.507848 -0.522675 -2.866322  
37 6 0 -0.709078 1.168805 -2.392096  
38 6 0 -1.433671 -0.823723 -3.713015  
39 7 0 3.911721 -2.568892 -0.345098  
40 1 0 3.545229 -3.674829 -2.132340  
41 7 0 3.203496 -2.179470 0.710121  
42 1 0 0.818396 -5.199516 -4.190869  
43 1 0 2.140648 -4.915230 -3.068630  
44 1 0 -0.008592 1.581415 -1.658014  
45 1 0 -0.553638 1.717878 -3.338124  
46 1 0 -1.721606 1.416416 -2.043412  
47 1 0 -1.260639 -0.257828 -4.643768  
48 1 0 -1.279757 -1.881903 -3.951537  
49 1 0 -2.498443 -0.705752 -3.468306  
50 1 0 0.879832 -6.079621 -2.658760  
51 1 0 0.430330 -3.053646 -2.953008  
52 6 0 -1.266516 -4.342761 -2.667542  
53 1 0 -1.526591 -5.275605 -2.153069  
54 1 0 -1.914406 -3.557466 -2.272753  
55 1 0 -1.492763 -4.471721 -3.730835  
56 1 0 -2.720348 0.735729 4.137920  
57 6 0 -1.543326 2.028071 1.121000  
58 1 0 -2.495846 2.020901 0.576662  
59 1 0 -1.364383 3.054965 1.456405  
60 1 0 -0.746296 1.759016 0.426855  
61 6 0 -6.340752 -1.250374 0.089344  
62 6 0 -7.251342 -0.476240 0.800532  
63 6 0 -6.768885 -2.196238 -0.837111  
64 6 0 -8.612792 -0.658688 0.594342  
65 1 0 -6.908597 0.277306 1.500661  
66 6 0 -8.129014 -2.368159 -1.055240

67 1 0 -6.043047 -2.790109 -1.379459  
68 6 0 -9.038175 -1.601786 -0.333683  
69 1 0 -9.333132 -0.062527 1.142118  
70 1 0 -8.477923 -3.100024 -1.774237  
71 17 0 -10.750669 -1.827182 -0.600444  
72 6 0 5.287974 -2.218672 -0.438818  
73 6 0 5.997898 -1.959547 0.729569  
74 6 0 5.889782 -2.105545 -1.686644  
75 6 0 7.330760 -1.580923 0.646348  
76 1 0 5.509564 -2.045569 1.692346  
77 6 0 7.227789 -1.741871 -1.769410  
78 1 0 5.321440 -2.261477 -2.596361  
79 6 0 7.934554 -1.479626 -0.602111  
80 1 0 7.893212 -1.370100 1.548164  
81 1 0 7.706743 -1.640761 -2.735959  
82 17 0 9.614240 -1.006452 -0.705256  
83 30 0 2.861642 1.214955 0.395840  
84 6 0 3.648361 0.833061 -1.362161  
85 1 0 3.591601 -0.246936 -1.561769  
86 6 0 2.421761 1.365553 2.302855  
87 1 0 1.529303 2.012125 2.354058  
88 6 0 5.131079 1.224369 -1.289322  
89 1 0 5.673590 0.690937 -0.499260  
90 1 0 5.662682 1.027297 -2.234862  
91 1 0 5.246663 2.295852 -1.080060  
92 6 0 2.998321 1.537413 -2.553827  
93 1 0 1.966190 1.214155 -2.718611  
94 1 0 2.977772 2.626553 -2.418301  
95 1 0 3.549038 1.350459 -3.491226  
96 6 0 3.549714 2.103126 3.035432  
97 1 0 3.792346 3.065827 2.572136  
98 1 0 3.303786 2.300638 4.092046  
99 1 0 4.479354 1.517591 3.038867  
100 6 0 2.081154 0.072759 3.043384  
101 1 0 2.914390 -0.641235 3.027157  
102 1 0 1.837191 0.252127 4.103988  
103 1 0 1.218870 -0.424123 2.589514  
104 8 0 5.149331 4.398292 0.713851  
105 6 0 4.241441 5.193442 0.623016

106 1 0 4.404627 6.275143 0.794910  
107 6 0 2.859412 4.835209 0.281372  
108 6 0 1.774461 5.670948 0.127684  
109 1 0 1.657684 6.740393 0.205869  
110 7 0 2.439584 3.560818 0.043202  
111 7 0 1.186045 3.568621 -0.247105  
112 7 0 0.762006 4.845962 -0.200776  
113 6 0 -0.604432 5.144567 -0.469056  
114 6 0 -1.289589 6.036698 0.347602  
115 6 0 -1.233102 4.496250 -1.525667  
116 6 0 -2.632121 6.292241 0.097131  
117 1 0 -0.792537 6.507953 1.188623  
118 6 0 -2.578246 4.738388 -1.766852  
119 1 0 -0.677744 3.803567 -2.146390  
120 6 0 -3.263150 5.636071 -0.954513  
121 1 0 -3.185316 6.979457 0.726328  
122 1 0 -3.083290 4.234907 -2.582705  
123 17 0 -4.956641 5.943856 -1.257972

---

TS2(S)

Sum of electronic and zero-point Energies = -9185.710883

Sum of electronic and thermal Energies = -9185.642323

Sum of electronic and thermal Enthalpies = -9185.641379

Sum of electronic and thermal Free Energies = -9185.821473

Standard orientation:

| Center<br>Number | Atomic<br>Number | Atomic<br>Type | Coordinates (Angstroms) |           |           |
|------------------|------------------|----------------|-------------------------|-----------|-----------|
|                  |                  |                | X                       | Y         | Z         |
| 1                | 6                | 0              | 2.836707                | -2.821872 | -1.410550 |
| 2                | 6                | 0              | 2.055330                | -1.804715 | -0.926279 |
| 3                | 7                | 0              | 3.322662                | -3.437683 | -0.302126 |
| 4                | 1                | 0              | 3.035569                | -3.178907 | -2.407197 |
| 5                | 7                | 0              | 2.884654                | -2.850518 | 0.811090  |
| 6                | 7                | 0              | 2.126701                | -1.868500 | 0.426556  |
| 7                | 6                | 0              | 1.264800                | -0.688497 | -1.559222 |
| 8                | 8                | 0              | 0.338241                | -0.218070 | -0.589987 |
| 9                | 30               | 0              | -1.052848               | -1.774816 | -0.512234 |
| 10               | 6                | 0              | -1.340655               | -3.188393 | -1.860038 |
| 11               | 1                | 0              | -1.949626               | -3.920253 | -1.302296 |
| 12               | 6                | 0              | -0.154443               | -3.963581 | -2.431540 |
| 13               | 1                | 0              | 0.467039                | -4.413262 | -1.648842 |
| 14               | 1                | 0              | -0.482405               | -4.778577 | -3.096669 |
| 15               | 1                | 0              | 0.497059                | -3.318877 | -3.036809 |
| 16               | 6                | 0              | -2.227713               | -2.675246 | -3.002301 |
| 17               | 1                | 0              | -2.536108               | -3.487786 | -3.680112 |
| 18               | 1                | 0              | -3.142174               | -2.196230 | -2.633482 |
| 19               | 1                | 0              | -1.708666               | -1.930324 | -3.618599 |
| 20               | 1                | 0              | 0.707778                | -1.096619 | -2.412847 |
| 21               | 6                | 0              | 2.200798                | 0.406761  | -2.112072 |
| 22               | 6                | 0              | 2.776088                | -0.005775 | -3.465707 |
| 23               | 1                | 0              | 1.557314                | 1.275801  | -2.278475 |
| 24               | 1                | 0              | 3.361202                | 0.812979  | -3.894851 |
| 25               | 1                | 0              | 3.447729                | -0.868405 | -3.373992 |
| 26               | 8                | 0              | -0.670130               | -1.707954 | 1.463813  |
| 27               | 6                | 0              | -1.756190               | -1.754649 | 2.344626  |



|    |    |   |           |           |           |
|----|----|---|-----------|-----------|-----------|
| 28 | 30 | 0 | 0.899516  | -0.473347 | 1.421681  |
| 29 | 6  | 0 | -3.015267 | -1.390497 | 1.576357  |
| 30 | 1  | 0 | -1.907219 | -2.794836 | 2.685887  |
| 31 | 6  | 0 | -1.482447 | -0.903982 | 3.601794  |
| 32 | 6  | 0 | 1.764846  | 0.658406  | 2.788014  |
| 33 | 6  | 0 | -4.353639 | -1.305078 | 1.878461  |
| 34 | 7  | 0 | -2.918121 | -1.207545 | 0.235461  |
| 35 | 6  | 0 | -2.709313 | -0.624268 | 4.467865  |
| 36 | 1  | 0 | 1.010557  | 0.867754  | 3.560893  |
| 37 | 6  | 0 | 2.332517  | 2.009486  | 2.342440  |
| 38 | 6  | 0 | 2.885840  | -0.151145 | 3.456075  |
| 39 | 7  | 0 | -4.963976 | -1.066196 | 0.689119  |
| 40 | 1  | 0 | -4.908248 | -1.423487 | 2.793816  |
| 41 | 7  | 0 | -4.082714 | -1.012566 | -0.303801 |
| 42 | 1  | 0 | -2.403560 | -0.129638 | 5.394702  |
| 43 | 1  | 0 | -3.425105 | 0.036605  | 3.971562  |
| 44 | 1  | 0 | 1.611189  | 2.620861  | 1.789845  |
| 45 | 1  | 0 | 2.685709  | 2.608874  | 3.196334  |
| 46 | 1  | 0 | 3.199874  | 1.868830  | 1.686103  |
| 47 | 1  | 0 | 3.372137  | 0.407333  | 4.271880  |
| 48 | 1  | 0 | 2.529468  | -1.095566 | 3.883199  |
| 49 | 1  | 0 | 3.673727  | -0.409672 | 2.736048  |
| 50 | 1  | 0 | -3.224404 | -1.551135 | 4.750451  |
| 51 | 1  | 0 | -1.096685 | 0.053402  | 3.235169  |
| 52 | 6  | 0 | -0.394930 | -1.587709 | 4.432256  |
| 53 | 1  | 0 | -0.793713 | -2.484199 | 4.922393  |
| 54 | 1  | 0 | 0.448450  | -1.896554 | 3.810243  |
| 55 | 1  | 0 | -0.013429 | -0.918961 | 5.209484  |
| 56 | 1  | 0 | 1.985165  | -0.261351 | -4.178506 |
| 57 | 6  | 0 | 3.304482  | 0.797065  | -1.133158 |
| 58 | 1  | 0 | 4.046630  | -0.002903 | -1.028090 |
| 59 | 1  | 0 | 3.819291  | 1.696039  | -1.479985 |
| 60 | 1  | 0 | 2.890912  | 1.014453  | -0.146313 |
| 61 | 6  | 0 | 4.177277  | -4.573223 | -0.232770 |
| 62 | 6  | 0 | 5.162581  | -4.740571 | -1.199421 |
| 63 | 6  | 0 | 4.005827  | -5.497884 | 0.792243  |
| 64 | 6  | 0 | 5.985240  | -5.858437 | -1.151240 |
| 65 | 1  | 0 | 5.301799  | -3.998225 | -1.977458 |
| 66 | 6  | 0 | 4.837547  | -6.608326 | 0.849532  |

|     |    |   |            |           |           |
|-----|----|---|------------|-----------|-----------|
| 67  | 1  | 0 | 3.229555   | -5.349943 | 1.533633  |
| 68  | 6  | 0 | 5.814174   | -6.781611 | -0.125982 |
| 69  | 1  | 0 | 6.757475   | -6.001814 | -1.897676 |
| 70  | 1  | 0 | 4.718139   | -7.339867 | 1.639990  |
| 71  | 17 | 0 | 6.848510   | -8.188797 | -0.062115 |
| 72  | 6  | 0 | -6.346335  | -0.856651 | 0.425511  |
| 73  | 6  | 0 | -6.891264  | -1.346888 | -0.756488 |
| 74  | 6  | 0 | -7.120710  | -0.159315 | 1.345538  |
| 75  | 6  | 0 | -8.238487  | -1.140242 | -1.018711 |
| 76  | 1  | 0 | -6.265662  | -1.881084 | -1.461861 |
| 77  | 6  | 0 | -8.472060  | 0.036257  | 1.090006  |
| 78  | 1  | 0 | -6.672513  | 0.249915  | 2.244310  |
| 79  | 6  | 0 | -9.016999  | -0.457333 | -0.089856 |
| 80  | 1  | 0 | -8.679677  | -1.515550 | -1.934432 |
| 81  | 1  | 0 | -9.088942  | 0.581555  | 1.794368  |
| 82  | 17 | 0 | -10.716346 | -0.209369 | -0.415018 |
| 83  | 30 | 0 | -0.831054  | 1.543590  | -1.155504 |
| 84  | 6  | 0 | -1.997610  | 2.050271  | 0.604721  |
| 85  | 1  | 0 | -1.713099  | 0.974702  | 0.545574  |
| 86  | 6  | 0 | -1.373157  | 1.101345  | -3.005820 |
| 87  | 1  | 0 | -0.955727  | 0.113285  | -3.258375 |
| 88  | 6  | 0 | -3.518252  | 2.047623  | 0.510520  |
| 89  | 1  | 0 | -3.867239  | 1.706369  | -0.468298 |
| 90  | 1  | 0 | -3.977290  | 1.406040  | 1.279128  |
| 91  | 1  | 0 | -3.936237  | 3.050621  | 0.661479  |
| 92  | 6  | 0 | -1.498958  | 2.473213  | 1.979899  |
| 93  | 1  | 0 | -0.441039  | 2.235838  | 2.124014  |
| 94  | 1  | 0 | -1.609015  | 3.553575  | 2.154629  |
| 95  | 1  | 0 | -2.056640  | 1.984714  | 2.793608  |
| 96  | 6  | 0 | -0.783408  | 2.110095  | -3.996729 |
| 97  | 1  | 0 | 0.313012   | 2.157516  | -3.943499 |
| 98  | 1  | 0 | -1.043338  | 1.874931  | -5.042653 |
| 99  | 1  | 0 | -1.157150  | 3.119186  | -3.787661 |
| 100 | 6  | 0 | -2.891613  | 1.017519  | -3.182091 |
| 101 | 1  | 0 | -3.359752  | 1.982026  | -2.951222 |
| 102 | 1  | 0 | -3.179650  | 0.755812  | -4.214533 |
| 103 | 1  | 0 | -3.345552  | 0.270710  | -2.520031 |
| 104 | 8  | 0 | -2.269320  | 4.105781  | -1.544810 |
| 105 | 6  | 0 | -1.754469  | 4.011175  | -0.423813 |

|     |    |   |           |          |           |
|-----|----|---|-----------|----------|-----------|
| 106 | 1  | 0 | -2.289835 | 4.354191 | 0.477528  |
| 107 | 6  | 0 | -0.255851 | 4.148825 | -0.325006 |
| 108 | 6  | 0 | 0.581138  | 5.174409 | 0.023826  |
| 109 | 1  | 0 | 0.407845  | 6.148690 | 0.450048  |
| 110 | 7  | 0 | 0.522532  | 3.138378 | -0.777223 |
| 111 | 7  | 0 | 1.776893  | 3.466635 | -0.746411 |
| 112 | 7  | 0 | 1.827579  | 4.704113 | -0.254945 |
| 113 | 6  | 0 | 3.084561  | 5.342221 | -0.065823 |
| 114 | 6  | 0 | 3.195807  | 6.715724 | -0.253460 |
| 115 | 6  | 0 | 4.185143  | 4.573991 | 0.301180  |
| 116 | 6  | 0 | 4.423979  | 7.335142 | -0.057780 |
| 117 | 1  | 0 | 2.339163  | 7.301544 | -0.568448 |
| 118 | 6  | 0 | 5.415799  | 5.189592 | 0.482393  |
| 119 | 1  | 0 | 4.072049  | 3.507110 | 0.450056  |
| 120 | 6  | 0 | 5.522956  | 6.565014 | 0.305221  |
| 121 | 1  | 0 | 4.526143  | 8.403991 | -0.203141 |
| 122 | 1  | 0 | 6.281290  | 4.604134 | 0.769528  |
| 123 | 17 | 0 | 7.072905  | 7.340019 | 0.539501  |

---

## 8(SS)·7(S)

Sum of electronic and zero-point Energies = -9185.810473

Sum of electronic and thermal Energies = -9185.742634

Sum of electronic and thermal Enthalpies = -9185.741689

Sum of electronic and thermal Free Energies = -9185.918038

Standard orientation:

| Center<br>Number | Atomic<br>Number | Atomic<br>Type | Coordinates (Angstroms) |           |           |
|------------------|------------------|----------------|-------------------------|-----------|-----------|
|                  |                  |                | X                       | Y         | Z         |
| 1                | 6                | 0              | 4.324451                | 0.200958  | -1.429270 |
| 2                | 6                | 0              | 3.040249                | 0.203059  | -0.948585 |
| 3                | 7                | 0              | 5.096266                | -0.046545 | -0.339428 |
| 4                | 1                | 0              | 4.732931                | 0.300801  | -2.421013 |
| 5                | 7                | 0              | 4.351872                | -0.188508 | 0.758177  |
| 6                | 7                | 0              | 3.118985                | -0.035091 | 0.384748  |
| 7                | 6                | 0              | 1.680457                | 0.417737  | -1.561585 |
| 8                | 8                | 0              | 0.732045                | -0.162137 | -0.684319 |
| 9                | 30               | 0              | 0.937159                | -2.211885 | -0.884362 |
| 10               | 6                | 0              | 1.790192                | -3.135951 | -2.402662 |
| 11               | 1                | 0              | 1.915740                | -4.172489 | -2.049469 |
| 12               | 6                | 0              | 3.168269                | -2.675026 | -2.878231 |
| 13               | 1                | 0              | 3.904298                | -2.652100 | -2.066042 |
| 14               | 1                | 0              | 3.570436                | -3.333928 | -3.664851 |
| 15               | 1                | 0              | 3.131969                | -1.667093 | -3.312448 |
| 16               | 6                | 0              | 0.815295                | -3.191347 | -3.586600 |
| 17               | 1                | 0              | 1.219216                | -3.771210 | -4.432633 |
| 18               | 1                | 0              | -0.140815               | -3.651036 | -3.308792 |
| 19               | 1                | 0              | 0.582850                | -2.189210 | -3.971957 |
| 20               | 1                | 0              | 1.645420                | -0.104899 | -2.527939 |
| 21               | 6                | 0              | 1.403659                | 1.909210  | -1.837455 |
| 22               | 6                | 0              | 2.269679                | 2.431905  | -2.981714 |
| 23               | 1                | 0              | 0.359561                | 1.950671  | -2.167351 |
| 24               | 1                | 0              | 1.971450                | 3.450296  | -3.247982 |
| 25               | 1                | 0              | 3.329997                | 2.467696  | -2.704736 |
| 26               | 8                | 0              | 1.196887                | -2.194491 | 1.116082  |
| 27               | 6                | 0              | 0.406859                | -3.106697 | 1.825992  |
| 28               | 30               | 0              | 1.228686                | -0.216606 | 1.373730  |
| 29               | 6                | 0              | -0.883411               | -3.321763 | 1.048305  |
| 30               | 1                | 0              | 0.925581                | -4.082600 | 1.851655  |

31 6 0 0.213240 -2.668606 3.290414  
32 6 0 1.106667 0.933760 2.978199  
33 6 0 -2.134922 -3.828679 1.293613  
34 7 0 -0.875012 -2.970238 -0.263093  
35 6 0 -0.638863 -3.638162 4.112913  
36 1 0 0.517283 0.377712 3.722751  
37 6 0 0.462930 2.317467 2.841570  
38 6 0 2.515900 1.102844 3.564058  
39 7 0 -2.798160 -3.708257 0.113509  
40 1 0 -2.599177 -4.269870 2.157948  
41 7 0 -2.018535 -3.193699 -0.827874  
42 1 0 -0.526713 -3.421721 5.179854  
43 1 0 -1.704236 -3.557188 3.889190  
44 1 0 -0.511708 2.289166 2.344097  
45 1 0 0.318069 2.800953 3.821078  
46 1 0 1.098029 2.993896 2.256408  
47 1 0 2.504735 1.664572 4.511946  
48 1 0 3.011293 0.145981 3.764269  
49 1 0 3.168664 1.656907 2.876612  
50 1 0 -0.326888 -4.678086 3.956763  
51 1 0 -0.286251 -1.692087 3.268357  
52 6 0 1.585019 -2.507275 3.948094  
53 1 0 2.063718 -3.485047 4.083606  
54 1 0 2.252049 -1.893800 3.340917  
55 1 0 1.489959 -2.038320 4.931997  
56 1 0 2.169485 1.811526 -3.879113  
57 6 0 1.541216 2.763044 -0.583259  
58 1 0 2.573405 2.780671 -0.214158  
59 1 0 1.238131 3.794068 -0.786158  
60 1 0 0.899139 2.381817 0.211420  
61 6 0 6.509863 -0.187638 -0.265923  
62 6 0 7.321094 0.581061 -1.093109  
63 6 0 7.052980 -1.094590 0.638364  
64 6 0 8.700743 0.431857 -1.026561  
65 1 0 6.888038 1.305325 -1.774159  
66 6 0 8.432095 -1.233177 0.716296  
67 1 0 6.401053 -1.684711 1.271324  
68 6 0 9.242417 -0.472815 -0.120508  
69 1 0 9.345003 1.025222 -1.664446  
70 1 0 8.870056 -1.935113 1.416021  
71 17 0 10.978658 -0.657497 -0.029945

72 6 0 -4.157130 -4.005592 -0.175499  
73 6 0 -4.500484 -4.435503 -1.453265  
74 6 0 -5.119286 -3.845676 0.815288  
75 6 0 -5.828626 -4.717525 -1.740779  
76 1 0 -3.735537 -4.539642 -2.213381  
77 6 0 -6.446769 -4.142634 0.532741  
78 1 0 -4.844576 -3.466233 1.793318  
79 6 0 -6.787546 -4.576157 -0.743152  
80 1 0 -6.112953 -5.050494 -2.731977  
81 1 0 -7.207924 -4.022470 1.294553  
82 17 0 -8.458855 -4.946020 -1.104014  
83 30 0 -1.300017 0.189463 -1.107643  
84 6 0 -2.625014 0.355621 2.758497  
85 1 0 -1.535534 0.354885 2.871662  
86 6 0 -1.595848 0.084624 -3.060026  
87 1 0 -0.618240 -0.018433 -3.560869  
88 6 0 -3.150513 -1.013699 3.183499  
89 1 0 -2.783486 -1.773112 2.492471  
90 1 0 -2.827189 -1.266593 4.199245  
91 1 0 -4.248822 -1.028119 3.168367  
92 6 0 -3.210852 1.447029 3.653169  
93 1 0 -2.704793 2.407560 3.523481  
94 1 0 -4.283250 1.589557 3.464557  
95 1 0 -3.102700 1.170213 4.707046  
96 6 0 -2.219302 1.390468 -3.567798  
97 1 0 -1.606146 2.270525 -3.335915  
98 1 0 -2.377298 1.383588 -4.659311  
99 1 0 -3.202777 1.569702 -3.111255  
100 6 0 -2.450799 -1.105122 -3.503209  
101 1 0 -3.428131 -1.110827 -3.001926  
102 1 0 -2.648497 -1.095618 -4.588991  
103 1 0 -1.975511 -2.061045 -3.264245  
104 8 0 -2.146779 -0.377332 0.514686  
105 6 0 -2.887423 0.529809 1.239738  
106 1 0 -3.978490 0.368928 1.096422  
107 6 0 -2.627816 1.945091 0.741675  
108 6 0 -3.131237 3.192335 1.026028  
109 1 0 -3.840474 3.547697 1.754256  
110 7 0 -1.745445 2.113751 -0.275879  
111 7 0 -1.664815 3.360514 -0.631988  
112 7 0 -2.502207 4.029106 0.160783

113 6 0 -2.635163 5.438752 0.035896  
114 6 0 -3.871206 6.036769 0.256988  
115 6 0 -1.519711 6.197140 -0.305158  
116 6 0 -3.994214 7.416106 0.144868  
117 1 0 -4.740863 5.434681 0.497002  
118 6 0 -1.644535 7.573799 -0.432672  
119 1 0 -0.564699 5.711102 -0.463766  
120 6 0 -2.879441 8.170650 -0.201987  
121 1 0 -4.951734 7.894973 0.311514  
122 1 0 -0.784687 8.177446 -0.698490  
123 17 0 -3.033282 9.906192 -0.352273

---

TS2(R) one small imaginary frequency was neglected

Sum of electronic and zero-point Energies = -9185.707882

Sum of electronic and thermal Energies = -9185.640516

Sum of electronic and thermal Enthalpies = -9185.639572

Sum of electronic and thermal Free Energies = -9185.814069

Standard orientation:

| -----  |        |        |                         |           |           |  |
|--------|--------|--------|-------------------------|-----------|-----------|--|
| Center | Atomic | Atomic | Coordinates (Angstroms) |           |           |  |
| Number | Number | Type   | X                       | Y         | Z         |  |
| -----  |        |        |                         |           |           |  |
| 1      | 6      | 0      | 3.068527                | -2.486287 | -1.501156 |  |
| 2      | 6      | 0      | 2.225576                | -1.577336 | -0.913905 |  |
| 3      | 7      | 0      | 3.538564                | -3.235097 | -0.470106 |  |
| 4      | 1      | 0      | 3.319285                | -2.686715 | -2.529112 |  |
| 5      | 7      | 0      | 3.031770                | -2.827117 | 0.692956  |  |
| 6      | 7      | 0      | 2.248559                | -1.829683 | 0.418628  |  |
| 7      | 6      | 0      | 1.387657                | -0.426212 | -1.414862 |  |
| 8      | 8      | 0      | 0.389223                | -0.175515 | -0.437587 |  |
| 9      | 30     | 0      | -0.841718               | -1.857358 | -0.580578 |  |
| 10     | 6      | 0      | -1.002886               | -2.970758 | -2.201494 |  |
| 11     | 1      | 0      | -1.665381               | -3.789277 | -1.875216 |  |
| 12     | 6      | 0      | 0.221431                | -3.627158 | -2.836233 |  |
| 13     | 1      | 0      | 0.792937                | -4.231436 | -2.121968 |  |
| 14     | 1      | 0      | -0.056114               | -4.287763 | -3.673383 |  |
| 15     | 1      | 0      | 0.908960                | -2.878234 | -3.251882 |  |
| 16     | 6      | 0      | -1.779588               | -2.181970 | -3.265001 |  |
| 17     | 1      | 0      | -2.035323               | -2.800878 | -4.140308 |  |
| 18     | 1      | 0      | -2.718327               | -1.772879 | -2.872144 |  |
| 19     | 1      | 0      | -1.196567               | -1.330894 | -3.642206 |  |
| 20     | 1      | 0      | 0.901813                | -0.732411 | -2.352906 |  |
| 21     | 6      | 0      | 2.266305                | 0.798940  | -1.737021 |  |
| 22     | 6      | 0      | 3.046073                | 0.589441  | -3.033973 |  |
| 23     | 1      | 0      | 1.558728                | 1.616345  | -1.901046 |  |
| 24     | 1      | 0      | 3.567468                | 1.509256  | -3.315453 |  |
| 25     | 1      | 0      | 3.808021                | -0.191768 | -2.927767 |  |
| 26     | 8      | 0      | -0.544497               | -2.031298 | 1.394128  |  |
| 27     | 6      | 0      | -1.677972               | -2.249525 | 2.189819  |  |



|    |    |   |           |           |           |
|----|----|---|-----------|-----------|-----------|
| 28 | 30 | 0 | 0.917285  | -0.700019 | 1.602419  |
| 29 | 6  | 0 | -2.909516 | -1.797918 | 1.417090  |
| 30 | 1  | 0 | -1.809793 | -3.336647 | 2.336887  |
| 31 | 6  | 0 | -1.498130 | -1.636236 | 3.594581  |
| 32 | 6  | 0 | 1.716743  | 0.249235  | 3.140868  |
| 33 | 6  | 0 | -4.261080 | -1.749309 | 1.662294  |
| 34 | 7  | 0 | -2.752231 | -1.460013 | 0.112813  |
| 35 | 6  | 0 | -2.779250 | -1.558662 | 4.422517  |
| 36 | 1  | 0 | 0.914718  | 0.403220  | 3.877853  |
| 37 | 6  | 0 | 2.368015  | 1.615400  | 2.892872  |
| 38 | 6  | 0 | 2.762805  | -0.671427 | 3.788497  |
| 39 | 7  | 0 | -4.816882 | -1.372265 | 0.481869  |
| 40 | 1  | 0 | -4.858344 | -1.971482 | 2.529836  |
| 41 | 7  | 0 | -3.890074 | -1.201299 | -0.455716 |
| 42 | 1  | 0 | -2.539626 | -1.263487 | 5.448508  |
| 43 | 1  | 0 | -3.479313 | -0.816595 | 4.029831  |
| 44 | 1  | 0 | 1.737160  | 2.301671  | 2.318295  |
| 45 | 1  | 0 | 2.625451  | 2.116914  | 3.839130  |
| 46 | 1  | 0 | 3.307479  | 1.508487  | 2.336121  |
| 47 | 1  | 0 | 3.217408  | -0.213697 | 4.681647  |
| 48 | 1  | 0 | 2.349425  | -1.636579 | 4.100649  |
| 49 | 1  | 0 | 3.584942  | -0.889477 | 3.093621  |
| 50 | 1  | 0 | -3.284738 | -2.531308 | 4.476446  |
| 51 | 1  | 0 | -1.126970 | -0.616237 | 3.446739  |
| 52 | 6  | 0 | -0.433625 | -2.440551 | 4.343018  |
| 53 | 1  | 0 | -0.835919 | -3.411845 | 4.656393  |
| 54 | 1  | 0 | 0.438628  | -2.630154 | 3.713303  |
| 55 | 1  | 0 | -0.098133 | -1.910354 | 5.238919  |
| 56 | 1  | 0 | 2.386965  | 0.310979  | -3.863902 |
| 57 | 6  | 0 | 3.181330  | 1.185140  | -0.582050 |
| 58 | 1  | 0 | 3.961582  | 0.432683  | -0.417813 |
| 59 | 1  | 0 | 3.673668  | 2.142191  | -0.776731 |
| 60 | 1  | 0 | 2.613451  | 1.299140  | 0.341335  |
| 61 | 6  | 0 | 4.411033  | -4.358962 | -0.511938 |
| 62 | 6  | 0 | 5.382029  | -4.443248 | -1.503465 |
| 63 | 6  | 0 | 4.264589  | -5.362137 | 0.441134  |
| 64 | 6  | 0 | 6.216810  | -5.552925 | -1.549234 |
| 65 | 1  | 0 | 5.503410  | -3.646459 | -2.228974 |
| 66 | 6  | 0 | 5.108580  | -6.463245 | 0.405270  |

|     |    |   |            |           |           |
|-----|----|---|------------|-----------|-----------|
| 67  | 1  | 0 | 3.496872   | -5.280418 | 1.200885  |
| 68  | 6  | 0 | 6.072966   | -6.551658 | -0.593115 |
| 69  | 1  | 0 | 6.978428   | -5.631610 | -2.315907 |
| 70  | 1  | 0 | 5.008178   | -7.250609 | 1.143000  |
| 71  | 17 | 0 | 7.125624   | -7.945498 | -0.646485 |
| 72  | 6  | 0 | -6.185490  | -1.127973 | 0.180229  |
| 73  | 6  | 0 | -6.653481  | -1.398189 | -1.101575 |
| 74  | 6  | 0 | -7.023293  | -0.611526 | 1.162264  |
| 75  | 6  | 0 | -7.985680  | -1.152787 | -1.403172 |
| 76  | 1  | 0 | -5.978611  | -1.789949 | -1.853242 |
| 77  | 6  | 0 | -8.360534  | -0.380976 | 0.865232  |
| 78  | 1  | 0 | -6.635446  | -0.364061 | 2.144281  |
| 79  | 6  | 0 | -8.828128  | -0.654246 | -0.414878 |
| 80  | 1  | 0 | -8.366377  | -1.353426 | -2.397699 |
| 81  | 1  | 0 | -9.026649  | 0.023050  | 1.618251  |
| 82  | 17 | 0 | -10.508819 | -0.356512 | -0.792763 |
| 83  | 30 | 0 | -0.940435  | 1.517898  | -0.277766 |
| 84  | 6  | 0 | -1.938832  | 1.475648  | 1.429399  |
| 85  | 1  | 0 | -1.835501  | 0.474836  | 1.862249  |
| 86  | 6  | 0 | -1.692984  | 1.596229  | -2.362501 |
| 87  | 1  | 0 | -1.443136  | 0.606918  | -1.912165 |
| 88  | 6  | 0 | -3.434038  | 1.759512  | 1.264735  |
| 89  | 1  | 0 | -3.919336  | 1.054159  | 0.583599  |
| 90  | 1  | 0 | -3.971963  | 1.714724  | 2.227781  |
| 91  | 1  | 0 | -3.595584  | 2.756101  | 0.841000  |
| 92  | 6  | 0 | -1.340877  | 2.460475  | 2.438571  |
| 93  | 1  | 0 | -0.297810  | 2.228797  | 2.674421  |
| 94  | 1  | 0 | -1.364083  | 3.491289  | 2.061776  |
| 95  | 1  | 0 | -1.894498  | 2.461060  | 3.392414  |
| 96  | 6  | 0 | -0.869020  | 1.626338  | -3.643899 |
| 97  | 1  | 0 | 0.203353   | 1.513749  | -3.454036 |
| 98  | 1  | 0 | -1.161063  | 0.834189  | -4.348741 |
| 99  | 1  | 0 | -0.996303  | 2.574243  | -4.186046 |
| 100 | 6  | 0 | -3.190040  | 1.514927  | -2.626249 |
| 101 | 1  | 0 | -3.525867  | 2.349093  | -3.254857 |
| 102 | 1  | 0 | -3.474212  | 0.585707  | -3.140034 |
| 103 | 1  | 0 | -3.760990  | 1.575739  | -1.694900 |
| 104 | 8  | 0 | -2.668574  | 4.031697  | -1.077358 |
| 105 | 6  | 0 | -1.744683  | 3.718234  | -1.847792 |

|     |    |   |           |          |           |
|-----|----|---|-----------|----------|-----------|
| 106 | 1  | 0 | -1.865372 | 3.832536 | -2.940728 |
| 107 | 6  | 0 | -0.338526 | 4.018936 | -1.369725 |
| 108 | 6  | 0 | 0.449878  | 5.140371 | -1.434462 |
| 109 | 1  | 0 | 0.339661  | 6.077886 | -1.954210 |
| 110 | 7  | 0 | 0.270618  | 3.171737 | -0.509693 |
| 111 | 7  | 0 | 1.365952  | 3.677448 | -0.036152 |
| 112 | 7  | 0 | 1.491553  | 4.878078 | -0.598433 |
| 113 | 6  | 0 | 2.622743  | 5.680111 | -0.280139 |
| 114 | 6  | 0 | 3.100022  | 6.603779 | -1.203617 |
| 115 | 6  | 0 | 3.242005  | 5.510584 | 0.955339  |
| 116 | 6  | 0 | 4.206626  | 7.381187 | -0.883721 |
| 117 | 1  | 0 | 2.629897  | 6.710523 | -2.174802 |
| 118 | 6  | 0 | 4.356596  | 6.275758 | 1.268299  |
| 119 | 1  | 0 | 2.856893  | 4.784902 | 1.661766  |
| 120 | 6  | 0 | 4.826336  | 7.206883 | 0.347942  |
| 121 | 1  | 0 | 4.588097  | 8.105732 | -1.593484 |
| 122 | 1  | 0 | 4.849226  | 6.151956 | 2.225444  |
| 123 | 17 | 0 | 6.227615  | 8.173533 | 0.746993  |

---

## 8(SS).7(R)

Sum of electronic and zero-point Energies= -9185.796028  
Sum of electronic and thermal Energies= -9185.728878  
Sum of electronic and thermal Enthalpies= -9185.727934  
Sum of electronic and thermal Free Energies= -9185.901538

Standard orientation:

-----  
Center Atomic Atomic Coordinates (Angstroms)

Number Number Type X Y Z  
-----

|    |    |   |           |           |           |
|----|----|---|-----------|-----------|-----------|
| 1  | 6  | 0 | 3.843286  | -1.467169 | -1.354193 |
| 2  | 6  | 0 | 2.781411  | -0.805438 | -0.794505 |
| 3  | 7  | 0 | 4.292398  | -2.289156 | -0.368872 |
| 4  | 1  | 0 | 4.271631  | -1.460284 | -2.342793 |
| 5  | 7  | 0 | 3.564329  | -2.154388 | 0.741355  |
| 6  | 7  | 0 | 2.663146  | -1.260071 | 0.478866  |
| 7  | 6  | 0 | 1.813297  | 0.259103  | -1.258632 |
| 8  | 8  | 0 | 0.641348  | 0.159250  | -0.497251 |
| 9  | 30 | 0 | -0.455428 | -1.395373 | -1.118758 |
| 10 | 6  | 0 | -0.282450 | -2.246931 | -2.894569 |
| 11 | 1  | 0 | -1.001052 | -3.082519 | -2.879066 |
| 12 | 6  | 0 | 1.089646  | -2.853852 | -3.198532 |
| 13 | 1  | 0 | 1.428056  | -3.537960 | -2.411082 |
| 14 | 1  | 0 | 1.094269  | -3.417755 | -4.146057 |
| 15 | 1  | 0 | 1.858445  | -2.076455 | -3.299278 |
| 16 | 6  | 0 | -0.711751 | -1.327357 | -4.042071 |
| 17 | 1  | 0 | -0.674990 | -1.831705 | -5.022114 |
| 18 | 1  | 0 | -1.734047 | -0.955354 | -3.906637 |
| 19 | 1  | 0 | -0.061438 | -0.444729 | -4.119646 |
| 20 | 1  | 0 | 1.589625  | 0.076043  | -2.321381 |
| 21 | 6  | 0 | 2.449787  | 1.664078  | -1.159188 |
| 22 | 6  | 0 | 3.482587  | 1.894739  | -2.260748 |
| 23 | 1  | 0 | 1.609602  | 2.348030  | -1.322470 |
| 24 | 1  | 0 | 3.893629  | 2.907539  | -2.197351 |
| 25 | 1  | 0 | 4.326003  | 1.200315  | -2.166293 |
| 26 | 8  | 0 | -0.141374 | -2.128568 | 0.742610  |
| 27 | 6  | 0 | -1.203444 | -2.788116 | 1.355733  |
| 28 | 30 | 0 | 0.876668  | -0.546762 | 1.416376  |
| 29 | 6  | 0 | -2.495565 | -2.285078 | 0.729538  |
| 30 | 1  | 0 | -1.152226 | -3.868244 | 1.122941  |
| 31 | 6  | 0 | -1.127990 | -2.659310 | 2.890530  |
| 32 | 6  | 0 | 1.139248  | 0.192060  | 3.228180  |
| 33 | 6  | 0 | -3.834587 | -2.538903 | 0.897213  |
| 34 | 7  | 0 | -2.398597 | -1.446755 | -0.337845 |
| 35 | 6  | 0 | -2.328736 | -3.257509 | 3.621677  |
| 36 | 1  | 0 | 0.429903  | -0.322777 | 3.892575  |
| 37 | 6  | 0 | 0.941281  | 1.693800  | 3.445538  |
| 38 | 6  | 0 | 2.544549  | -0.211368 | 3.695727  |
| 39 | 7  | 0 | -4.450363 | -1.822080 | -0.079635 |
| 40 | 1  | 0 | -4.382341 | -3.168138 | 1.577349  |
| 41 | 7  | 0 | -3.568353 | -1.168475 | -0.827415 |
| 42 | 1  | 0 | -2.136557 | -3.288218 | 4.698397  |
| 43 | 1  | 0 | -3.235781 | -2.663373 | 3.479173  |
| 44 | 1  | 0 | -0.037997 | 2.046387  | 3.105723  |
| 45 | 1  | 0 | 1.035813  | 1.966088  | 4.509494  |
| 46 | 1  | 0 | 1.686403  | 2.286668  | 2.903015  |
| 47 | 1  | 0 | 2.746038  | 0.112151  | 4.729647  |
| 48 | 1  | 0 | 2.701648  | -1.296416 | 3.660657  |

49 1 0 3.323279 0.238916 3.065508  
 50 1 0 -2.526679 -4.286669 3.296111  
 51 1 0 -1.087634 -1.587045 3.109380  
 52 6 0 0.172698 -3.296633 3.381248  
 53 1 0 0.145704 -4.385041 3.245443  
 54 1 0 1.038102 -2.915161 2.833789  
 55 1 0 0.327593 -3.093074 4.445231  
 56 1 0 3.047299 1.765355 -3.258135  
 57 6 0 3.043982 1.933895 0.220943  
 58 1 0 3.942880 1.330784 0.391271  
 59 1 0 3.329593 2.984046 0.328036  
 60 1 0 2.321893 1.703175 1.006388  
 61 6 0 5.358456 -3.228714 -0.422082  
 62 6 0 6.502772 -2.923221 -1.150880  
 63 6 0 5.233428 -4.440506 0.249816  
 64 6 0 7.534106 -3.850622 -1.225891  
 65 1 0 6.600718 -1.963324 -1.645634  
 66 6 0 6.270163 -5.361991 0.188459  
 67 1 0 4.331256 -4.658571 0.808871  
 68 6 0 7.407000 -5.061263 -0.554581  
 69 1 0 8.431975 -3.626208 -1.789562  
 70 1 0 6.187041 -6.311502 0.703855  
 71 17 0 8.703170 -6.231147 -0.647601  
 72 6 0 -5.839926 -1.713507 -0.366429  
 73 6 0 -6.242371 -1.514567 -1.683491  
 74 6 0 -6.766970 -1.799132 0.666332  
 75 6 0 -7.595214 -1.401472 -1.970804  
 76 1 0 -5.501425 -1.446302 -2.470855  
 77 6 0 -8.122411 -1.702368 0.376732  
 78 1 0 -6.441170 -1.916327 1.694057  
 79 6 0 -8.522621 -1.504207 -0.939458  
 80 1 0 -7.924357 -1.244039 -2.991076  
 81 1 0 -8.857053 -1.764427 1.170766  
 82 17 0 -10.227504 -1.376544 -1.306089  
 83 30 0 -2.266949 1.615313 1.170103  
 84 6 0 -2.978566 0.618084 2.690939  
 85 1 0 -2.694650 -0.431894 2.569242  
 86 6 0 -2.237214 1.781042 -2.536952  
 87 1 0 -1.731659 0.915223 -2.087336  
 88 6 0 -4.506125 0.678964 2.539470  
 89 1 0 -4.842091 0.352523 1.549292  
 90 1 0 -5.016985 0.054530 3.291344  
 91 1 0 -4.887627 1.699427 2.672462  
 92 6 0 -2.573031 1.035520 4.104245  
 93 1 0 -1.511927 0.856401 4.299836  
 94 1 0 -2.760173 2.100903 4.290661  
 95 1 0 -3.141495 0.477726 4.866229  
 96 6 0 -1.343755 2.358340 -3.633555  
 97 1 0 -0.318238 2.523336 -3.287355  
 98 1 0 -1.294139 1.672681 -4.485079  
 99 1 0 -1.739307 3.312384 -4.006872  
 100 6 0 -3.579775 1.327334 -3.106348  
 101 1 0 -4.085223 2.164275 -3.606457  
 102 1 0 -3.450374 0.530175 -3.846361  
 103 1 0 -4.220617 0.962635 -2.302745  
 104 8 0 -3.220490 2.150315 -0.359191  
 105 6 0 -2.516983 2.763664 -1.369383  
 106 1 0 -3.089723 3.607837 -1.802606  
 107 6 0 -1.244715 3.356993 -0.799466  
 108 6 0 -0.333253 4.295258 -1.208271  
 109 1 0 -0.264466 4.905224 -2.093467  
 110 7 0 -0.846589 2.944797 0.432620  
 111 7 0 0.239465 3.553390 0.806617

112 7 0 0.560104 4.377758 -0.186816  
113 6 0 1.746741 5.156003 -0.115167  
114 6 0 2.457470 5.416655 -1.282020  
115 6 0 2.199748 5.604606 1.120994  
116 6 0 3.633716 6.152403 -1.216869  
117 1 0 2.115542 5.027173 -2.234646  
118 6 0 3.383603 6.327060 1.188902  
119 1 0 1.636543 5.379336 2.018861  
120 6 0 4.086165 6.599240 0.019328  
121 1 0 4.196915 6.362602 -2.118540  
122 1 0 3.752461 6.681623 2.144230  
123 17 0 5.570457 7.518628 0.103288

---

13(SSSS) one small imaginary frequency was neglected

Sum of electronic and zero-point Energies = -12247.727919

Sum of electronic and thermal Energies = -12247.637296

Sum of electronic and thermal Enthalpies = -12247.636352

Sum of electronic and thermal Free Energies = -12247.863322

Standard orientation:

| Center<br>Number | Atomic<br>Number | Atomic<br>Type | Coordinates (Angstroms) |           |           |
|------------------|------------------|----------------|-------------------------|-----------|-----------|
|                  |                  |                | X                       | Y         | Z         |
| 1                | 30               | 0              | 3.536268                | 1.065253  | 0.720390  |
| 2                | 6                | 0              | 4.809485                | 2.543176  | 0.447542  |
| 3                | 6                | 0              | 5.023019                | 2.811905  | -1.047482 |
| 4                | 6                | 0              | -1.605435               | -0.476596 | 2.049076  |
| 5                | 8                | 0              | -2.085704               | -0.658420 | 0.738529  |
| 6                | 30               | 0              | -3.531454               | 0.525108  | 0.051825  |
| 7                | 6                | 0              | -4.647725               | 1.340401  | 1.427286  |
| 8                | 6                | 0              | -5.542017               | 2.521467  | 1.064206  |
| 9                | 8                | 0              | 2.907653                | -0.296281 | -0.625822 |
| 10               | 30               | 0              | 3.146272                | -1.893633 | 0.432667  |
| 11               | 8                | 0              | 3.765863                | -0.607549 | 1.757055  |
| 12               | 6                | 0              | 4.690366                | -0.851593 | 2.778133  |
| 13               | 6                | 0              | 2.426186                | -0.095651 | -1.924586 |
| 14               | 6                | 0              | 1.844320                | -1.396343 | -2.519776 |
| 15               | 6                | 0              | 0.725491                | -1.996303 | -1.670420 |
| 16               | 6                | 0              | 1.391909                | -1.206931 | -3.966401 |
| 17               | 6                | 0              | 3.387985                | -3.833169 | 0.311431  |
| 18               | 6                | 0              | 2.342829                | -4.654266 | 1.070098  |
| 19               | 6                | 0              | 4.250297                | -2.070010 | 3.617546  |
| 20               | 6                | 0              | 5.264529                | -2.444393 | 4.696857  |
| 21               | 6                | 0              | 2.877220                | -1.787443 | 4.226709  |
| 22               | 6                | 0              | 6.162027                | 2.285898  | 1.121447  |
| 23               | 6                | 0              | -1.301376               | -1.803687 | 2.759414  |
| 24               | 6                | 0              | -0.933914               | -1.564948 | 4.224027  |
| 25               | 6                | 0              | -0.254851               | -2.668245 | 2.059455  |
| 26               | 30               | 0              | -2.522604               | -2.178915 | -0.379861 |
| 27               | 8                | 0              | -3.293717               | -0.690021 | -1.452951 |

|    |   |   |           |           |           |
|----|---|---|-----------|-----------|-----------|
| 28 | 6 | 0 | -4.232409 | -0.828324 | -2.503722 |
| 29 | 6 | 0 | -2.711042 | -4.117788 | -0.249715 |
| 30 | 6 | 0 | -2.035728 | -4.925725 | -1.359327 |
| 31 | 6 | 0 | -4.181655 | -4.528939 | -0.110383 |
| 32 | 6 | 0 | -5.469847 | 0.181204  | 2.012299  |
| 33 | 6 | 0 | -4.000757 | -2.121759 | -3.297453 |
| 34 | 6 | 0 | -2.562394 | -2.181173 | -3.811469 |
| 35 | 6 | 0 | -4.993455 | -2.250190 | -4.453187 |
| 36 | 1 | 0 | 3.254657  | 0.208587  | -2.583155 |
| 37 | 1 | 0 | 2.680770  | -2.106884 | -2.516063 |
| 38 | 1 | 0 | 1.102966  | -2.164703 | -4.410434 |
| 39 | 1 | 0 | 2.188000  | -0.775680 | -4.581900 |
| 40 | 1 | 0 | 0.526402  | -0.538078 | -4.027164 |
| 41 | 1 | 0 | -0.180511 | -1.382614 | -1.726432 |
| 42 | 1 | 0 | 0.472037  | -3.001279 | -2.021837 |
| 43 | 1 | 0 | 1.019234  | -2.069928 | -0.620856 |
| 44 | 1 | 0 | 4.355911  | -4.012662 | 0.807012  |
| 45 | 1 | 0 | 2.265947  | -4.364427 | 2.124360  |
| 46 | 1 | 0 | 2.574967  | -5.730138 | 1.044892  |
| 47 | 1 | 0 | 1.344616  | -4.538062 | 0.629061  |
| 48 | 1 | 0 | 4.726662  | 0.014070  | 3.459679  |
| 49 | 1 | 0 | 4.157065  | -2.911360 | 2.916157  |
| 50 | 1 | 0 | 2.439895  | -2.689664 | 4.666672  |
| 51 | 1 | 0 | 2.194630  | -1.398836 | 3.467762  |
| 52 | 1 | 0 | 2.956218  | -1.033176 | 5.019934  |
| 53 | 1 | 0 | 6.218120  | -2.767580 | 4.271775  |
| 54 | 1 | 0 | 4.876691  | -3.259533 | 5.316402  |
| 55 | 1 | 0 | 5.470909  | -1.592455 | 5.354785  |
| 56 | 1 | 0 | 4.401612  | 3.462015  | 0.892540  |
| 57 | 1 | 0 | 6.855028  | 3.131514  | 0.984924  |
| 58 | 1 | 0 | 6.662740  | 1.403963  | 0.702965  |
| 59 | 1 | 0 | 6.070331  | 2.113781  | 2.199767  |
| 60 | 1 | 0 | 4.094651  | 3.043816  | -1.583211 |
| 61 | 1 | 0 | 5.721455  | 3.646071  | -1.223624 |
| 62 | 1 | 0 | 5.454285  | 1.934726  | -1.548625 |
| 63 | 1 | 0 | -0.441113 | -2.727114 | 0.984597  |
| 64 | 1 | 0 | 0.749731  | -2.267484 | 2.200894  |
| 65 | 1 | 0 | -0.275188 | -3.685981 | 2.458478  |
| 66 | 1 | 0 | -2.256611 | -2.348108 | 2.731483  |



|     |   |   |           |           |           |
|-----|---|---|-----------|-----------|-----------|
| 67  | 1 | 0 | 0.001094  | -1.001092 | 4.309761  |
| 68  | 1 | 0 | -0.792349 | -2.516675 | 4.744670  |
| 69  | 1 | 0 | -1.716891 | -1.008745 | 4.750979  |
| 70  | 1 | 0 | -2.389210 | 0.017034  | 2.645337  |
| 71  | 1 | 0 | -4.282002 | -5.603425 | 0.102489  |
| 72  | 1 | 0 | -4.742575 | -4.348469 | -1.037109 |
| 73  | 1 | 0 | -4.693884 | -3.992188 | 0.698060  |
| 74  | 1 | 0 | -2.159592 | -6.007259 | -1.200434 |
| 75  | 1 | 0 | -2.459132 | -4.701298 | -2.346499 |
| 76  | 1 | 0 | -0.958633 | -4.732039 | -1.416550 |
| 77  | 1 | 0 | -2.214826 | -4.388253 | 0.693055  |
| 78  | 1 | 0 | -3.970783 | 1.683150  | 2.225700  |
| 79  | 1 | 0 | -6.173352 | -0.223008 | 1.275626  |
| 80  | 1 | 0 | -6.067703 | 0.496846  | 2.880397  |
| 81  | 1 | 0 | -4.838459 | -0.654120 | 2.343139  |
| 82  | 1 | 0 | -4.954449 | 3.399592  | 0.777768  |
| 83  | 1 | 0 | -6.176679 | 2.821897  | 1.912751  |
| 84  | 1 | 0 | -6.211375 | 2.292869  | 0.227945  |
| 85  | 1 | 0 | -4.106380 | 0.014982  | -3.202197 |
| 86  | 1 | 0 | -4.154912 | -2.963890 | -2.607441 |
| 87  | 1 | 0 | -4.874328 | -1.425677 | -5.165493 |
| 88  | 1 | 0 | -6.031028 | -2.244148 | -4.107697 |
| 89  | 1 | 0 | -4.826709 | -3.184715 | -4.996881 |
| 90  | 1 | 0 | -2.393831 | -3.091934 | -4.393180 |
| 91  | 1 | 0 | -2.344767 | -1.323365 | -4.458577 |
| 92  | 1 | 0 | -1.839319 | -2.171003 | -2.993432 |
| 93  | 6 | 0 | 3.517861  | -4.363874 | -1.119849 |
| 94  | 1 | 0 | 4.294454  | -3.844132 | -1.694895 |
| 95  | 1 | 0 | 3.767874  | -5.436116 | -1.135270 |
| 96  | 1 | 0 | 2.577662  | -4.254200 | -1.674759 |
| 97  | 6 | 0 | 6.072281  | -0.990695 | 2.197344  |
| 98  | 6 | 0 | 6.449165  | -1.377521 | 0.934513  |
| 99  | 1 | 0 | 5.897814  | -1.674190 | 0.057018  |
| 100 | 7 | 0 | 7.197516  | -0.640605 | 2.880293  |
| 101 | 7 | 0 | 8.234723  | -0.788069 | 2.116067  |
| 102 | 7 | 0 | 7.797986  | -1.235126 | 0.925139  |
| 103 | 6 | 0 | 8.707603  | -1.423492 | -0.145850 |
| 104 | 6 | 0 | 8.468957  | -2.407119 | -1.100987 |
| 105 | 6 | 0 | 9.831653  | -0.605696 | -0.225789 |

|     |    |   |            |           |           |
|-----|----|---|------------|-----------|-----------|
| 106 | 6  | 0 | 9.358476   | -2.567862 | -2.156797 |
| 107 | 1  | 0 | 7.604673   | -3.057435 | -1.017566 |
| 108 | 6  | 0 | 10.729960  | -0.776817 | -1.269643 |
| 109 | 1  | 0 | 9.993926   | 0.157385  | 0.525687  |
| 110 | 6  | 0 | 10.481828  | -1.752645 | -2.228839 |
| 111 | 1  | 0 | 9.184390   | -3.329689 | -2.907607 |
| 112 | 1  | 0 | 11.609201  | -0.147529 | -1.341774 |
| 113 | 17 | 0 | 11.608133  | -1.958510 | -3.552789 |
| 114 | 6  | 0 | -5.615257  | -0.695212 | -1.936793 |
| 115 | 6  | 0 | -6.419362  | -1.592467 | -1.273846 |
| 116 | 1  | 0 | -6.311500  | -2.639495 | -1.039212 |
| 117 | 7  | 0 | -6.231272  | 0.518089  | -1.903304 |
| 118 | 7  | 0 | -7.357498  | 0.420250  | -1.267086 |
| 119 | 7  | 0 | -7.487497  | -0.858172 | -0.878637 |
| 120 | 6  | 0 | -8.611782  | -1.258733 | -0.106655 |
| 121 | 6  | 0 | -9.165427  | -2.521402 | -0.287733 |
| 122 | 6  | 0 | -9.129889  | -0.371487 | 0.832517  |
| 123 | 6  | 0 | -10.250512 | -2.909144 | 0.489081  |
| 124 | 1  | 0 | -8.768618  | -3.195266 | -1.039340 |
| 125 | 6  | 0 | -10.222171 | -0.752830 | 1.599513  |
| 126 | 1  | 0 | -8.676360  | 0.604209  | 0.961171  |
| 127 | 6  | 0 | -10.769292 | -2.019351 | 1.422989  |
| 128 | 1  | 0 | -10.695756 | -3.888245 | 0.357925  |
| 129 | 1  | 0 | -10.635983 | -0.073173 | 2.335155  |
| 130 | 17 | 0 | -12.140425 | -2.501190 | 2.394795  |
| 131 | 6  | 0 | -0.470604  | 0.509151  | 1.963589  |
| 132 | 6  | 0 | -0.565079  | 1.882567  | 2.000498  |
| 133 | 1  | 0 | -1.388733  | 2.551531  | 2.195452  |
| 134 | 7  | 0 | 0.797338   | 0.193116  | 1.610195  |
| 135 | 7  | 0 | 1.475852   | 1.286077  | 1.437889  |
| 136 | 7  | 0 | 0.663506   | 2.327611  | 1.663485  |
| 137 | 6  | 0 | 1.066254   | 3.679039  | 1.463941  |
| 138 | 6  | 0 | 0.657270   | 4.649861  | 2.371964  |
| 139 | 6  | 0 | 1.802245   | 4.011108  | 0.334237  |
| 140 | 6  | 0 | 0.980342   | 5.979599  | 2.136230  |
| 141 | 1  | 0 | 0.099410   | 4.372089  | 3.259733  |
| 142 | 6  | 0 | 2.141183   | 5.337629  | 0.103536  |
| 143 | 1  | 0 | 2.113450   | 3.245486  | -0.363998 |
| 144 | 6  | 0 | 1.718283   | 6.309943  | 1.003322  |

|     |    |   |           |          |           |
|-----|----|---|-----------|----------|-----------|
| 145 | 1  | 0 | 0.669143  | 6.748928 | 2.832747  |
| 146 | 1  | 0 | 2.716913  | 5.602482 | -0.775452 |
| 147 | 17 | 0 | 2.117916  | 7.983795 | 0.705491  |
| 148 | 6  | 0 | 1.454894  | 1.056290 | -1.987955 |
| 149 | 6  | 0 | 0.181172  | 1.225034 | -1.490312 |
| 150 | 1  | 0 | -0.460363 | 0.609485 | -0.876011 |
| 151 | 7  | 0 | 1.785046  | 2.194035 | -2.664863 |
| 152 | 7  | 0 | 0.802520  | 3.040010 | -2.617630 |
| 153 | 7  | 0 | -0.180937 | 2.463759 | -1.902000 |
| 154 | 6  | 0 | -1.431404 | 3.120327 | -1.763684 |
| 155 | 6  | 0 | -2.602422 | 2.418312 | -2.038967 |
| 156 | 6  | 0 | -1.462858 | 4.464883 | -1.411616 |
| 157 | 6  | 0 | -3.830409 | 3.069556 | -1.967269 |
| 158 | 1  | 0 | -2.541845 | 1.381166 | -2.355151 |
| 159 | 6  | 0 | -2.685853 | 5.121469 | -1.351066 |
| 160 | 1  | 0 | -0.537791 | 4.991945 | -1.206881 |
| 161 | 6  | 0 | -3.854294 | 4.420434 | -1.633452 |
| 162 | 1  | 0 | -4.751262 | 2.531147 | -2.175779 |
| 163 | 1  | 0 | -2.728748 | 6.173203 | -1.092594 |
| 164 | 17 | 0 | -5.383589 | 5.262546 | -1.583394 |

---

# 14(SSSS)

Sum of electronic and zero-point Energies = -14263.727930

Sum of electronic and thermal Energies = -14263.624817

Sum of electronic and thermal Enthalpies = -14263.623873

Sum of electronic and thermal Free Energies = -14263.874871

Standard orientation:

| Center<br>Number | Atomic<br>Number | Atomic<br>Type | Coordinates (Angstroms) |           |           |
|------------------|------------------|----------------|-------------------------|-----------|-----------|
|                  |                  |                | X                       | Y         | Z         |
| 1                | 30               | 0              | -3.042973               | 0.167826  | -1.140958 |
| 2                | 6                | 0              | -4.502161               | 1.490764  | -1.304268 |
| 3                | 6                | 0              | -5.813582               | 1.167469  | -0.574288 |
| 4                | 6                | 0              | 2.314261                | -0.521805 | -2.245179 |
| 5                | 8                | 0              | 2.733878                | -0.644515 | -0.915856 |
| 6                | 30               | 0              | 3.724231                | 0.816926  | 0.012978  |
| 7                | 6                | 0              | 4.768198                | 1.891077  | -1.231162 |
| 8                | 6                | 0              | 5.462062                | 3.166019  | -0.764680 |
| 9                | 8                | 0              | -2.410435               | -1.175452 | 0.237730  |
| 10               | 30               | 0              | -2.289503               | -2.751933 | -0.910455 |
| 11               | 8                | 0              | -2.925349               | -1.497116 | -2.257560 |
| 12               | 6                | 0              | -3.981682               | -1.850187 | -3.112494 |
| 13               | 6                | 0              | -1.914660               | -0.952914 | 1.533442  |
| 14               | 6                | 0              | -1.136561               | -2.161034 | 2.082985  |
| 15               | 6                | 0              | 0.036059                | -2.606052 | 1.209037  |
| 16               | 6                | 0              | -0.722188               | -1.948410 | 3.539659  |
| 17               | 6                | 0              | -2.230461               | -4.710540 | -0.830197 |
| 18               | 6                | 0              | -1.098571               | -5.328723 | -1.655438 |
| 19               | 6                | 0              | -3.627099               | -3.109167 | -3.932657 |
| 20               | 6                | 0              | -4.720159               | -3.474655 | -4.936215 |
| 21               | 6                | 0              | -2.286856               | -2.906577 | -4.640570 |
| 22               | 6                | 0              | -4.827564               | 1.791023  | -2.773611 |
| 23               | 6                | 0              | 2.248212                | -1.877341 | -2.973942 |
| 24               | 6                | 0              | 1.951978                | -1.686453 | -4.460864 |
| 25               | 6                | 0              | 1.269711                | -2.865207 | -2.344631 |
| 26               | 30               | 0              | 3.336944                | -2.085871 | 0.199537  |
| 27               | 8                | 0              | 3.563730                | -0.520742 | 1.433497  |

|    |   |   |           |           |           |
|----|---|---|-----------|-----------|-----------|
| 28 | 6 | 0 | 4.436188  | -0.548093 | 2.549735  |
| 29 | 6 | 0 | 3.833644  | -3.970340 | 0.058584  |
| 30 | 6 | 0 | 3.009692  | -4.916724 | 0.934969  |
| 31 | 6 | 0 | 5.331037  | -4.227881 | 0.259241  |
| 32 | 6 | 0 | 5.791848  | 0.893782  | -1.797635 |
| 33 | 6 | 0 | 4.340201  | -1.886592 | 3.296227  |
| 34 | 6 | 0 | 2.889488  | -2.176290 | 3.674498  |
| 35 | 6 | 0 | 5.236508  | -1.901129 | 4.534108  |
| 36 | 1 | 0 | -2.763049 | -0.803973 | 2.213918  |
| 37 | 1 | 0 | -1.864878 | -2.981829 | 2.072820  |
| 38 | 1 | 0 | -0.297256 | -2.866925 | 3.955985  |
| 39 | 1 | 0 | -1.582360 | -1.669028 | 4.157134  |
| 40 | 1 | 0 | 0.030293  | -1.160800 | 3.642245  |
| 41 | 1 | 0 | 0.783892  | -1.823255 | 1.058621  |
| 42 | 1 | 0 | 0.529290  | -3.473038 | 1.656382  |
| 43 | 1 | 0 | -0.306343 | -2.900974 | 0.216507  |
| 44 | 1 | 0 | -3.177513 | -5.020680 | -1.297523 |
| 45 | 1 | 0 | -1.091766 | -4.973130 | -2.692700 |
| 46 | 1 | 0 | -1.171699 | -6.426349 | -1.688121 |
| 47 | 1 | 0 | -0.117041 | -5.091235 | -1.225797 |
| 48 | 1 | 0 | -4.152965 | -1.033299 | -3.832101 |
| 49 | 1 | 0 | -3.517964 | -3.937254 | -3.219482 |
| 50 | 1 | 0 | -1.988839 | -3.814180 | -5.175513 |
| 51 | 1 | 0 | -1.497771 | -2.647167 | -3.931059 |
| 52 | 1 | 0 | -2.355442 | -2.094068 | -5.374933 |
| 53 | 1 | 0 | -5.677480 | -3.674769 | -4.449972 |
| 54 | 1 | 0 | -4.432391 | -4.366018 | -5.503158 |
| 55 | 1 | 0 | -4.880925 | -2.660430 | -5.652922 |
| 56 | 1 | 0 | -4.119996 | 2.426268  | -0.874358 |
| 57 | 1 | 0 | -5.545074 | 2.620293  | -2.875519 |
| 58 | 1 | 0 | -5.289302 | 0.921074  | -3.258781 |
| 59 | 1 | 0 | -3.942958 | 2.057255  | -3.362740 |
| 60 | 1 | 0 | -5.669719 | 0.754986  | 0.429912  |
| 61 | 1 | 0 | -6.452954 | 2.057765  | -0.470259 |
| 62 | 1 | 0 | -6.402543 | 0.434825  | -1.136681 |
| 63 | 1 | 0 | 1.434997  | -2.958040 | -1.268366 |
| 64 | 1 | 0 | 0.233712  | -2.548024 | -2.498806 |
| 65 | 1 | 0 | 1.390340  | -3.856526 | -2.789756 |
| 66 | 1 | 0 | 3.260937  | -2.294970 | -2.876885 |

|     |   |   |           |           |           |
|-----|---|---|-----------|-----------|-----------|
| 67  | 1 | 0 | 0.941495  | -1.291164 | -4.614654 |
| 68  | 1 | 0 | 2.016104  | -2.641009 | -4.991176 |
| 69  | 1 | 0 | 2.661609  | -0.995230 | -4.928616 |
| 70  | 1 | 0 | 3.039516  | 0.093603  | -2.802506 |
| 71  | 1 | 0 | 5.588030  | -5.275582 | 0.044577  |
| 72  | 1 | 0 | 5.643501  | -4.043407 | 1.296111  |
| 73  | 1 | 0 | 5.955495  | -3.605404 | -0.394139 |
| 74  | 1 | 0 | 3.328505  | -5.961629 | 0.804851  |
| 75  | 1 | 0 | 3.110010  | -4.686711 | 2.003763  |
| 76  | 1 | 0 | 1.942335  | -4.879449 | 0.691258  |
| 77  | 1 | 0 | 3.608463  | -4.229803 | -0.986749 |
| 78  | 1 | 0 | 4.095462  | 2.165980  | -2.057890 |
| 79  | 1 | 0 | 6.520007  | 0.594544  | -1.034331 |
| 80  | 1 | 0 | 6.368511  | 1.325320  | -2.629176 |
| 81  | 1 | 0 | 5.323694  | -0.025818 | -2.172512 |
| 82  | 1 | 0 | 4.740167  | 3.950241  | -0.520423 |
| 83  | 1 | 0 | 6.126518  | 3.570013  | -1.544802 |
| 84  | 1 | 0 | 6.077678  | 2.999078  | 0.125914  |
| 85  | 1 | 0 | 4.139304  | 0.243131  | 3.255945  |
| 86  | 1 | 0 | 4.677706  | -2.672179 | 2.604976  |
| 87  | 1 | 0 | 4.934330  | -1.121126 | 5.242379  |
| 88  | 1 | 0 | 6.288661  | -1.735895 | 4.286400  |
| 89  | 1 | 0 | 5.159320  | -2.863109 | 5.049150  |
| 90  | 1 | 0 | 2.801940  | -3.138813 | 4.186935  |
| 91  | 1 | 0 | 2.504295  | -1.403360 | 4.350733  |
| 92  | 1 | 0 | 2.243529  | -2.203156 | 2.795499  |
| 93  | 6 | 0 | -2.223637 | -5.303351 | 0.581548  |
| 94  | 1 | 0 | -3.061987 | -4.945047 | 1.191399  |
| 95  | 1 | 0 | -2.290315 | -6.401893 | 0.559525  |
| 96  | 1 | 0 | -1.299920 | -5.057173 | 1.120214  |
| 97  | 6 | 0 | -5.242552 | -1.989729 | -2.292026 |
| 98  | 6 | 0 | -5.342103 | -2.080540 | -0.923296 |
| 99  | 1 | 0 | -4.612853 | -2.029146 | -0.130307 |
| 100 | 7 | 0 | -6.506932 | -1.943569 | -2.796718 |
| 101 | 7 | 0 | -7.366539 | -2.004537 | -1.824095 |
| 102 | 7 | 0 | -6.672033 | -2.089197 | -0.676701 |
| 103 | 6 | 0 | -7.321588 | -2.046811 | 0.582828  |
| 104 | 6 | 0 | -6.706443 | -2.616617 | 1.694067  |
| 105 | 6 | 0 | -8.549314 | -1.401271 | 0.698933  |

|     |    |   |            |           |           |
|-----|----|---|------------|-----------|-----------|
| 106 | 6  | 0 | -7.318437  | -2.531150 | 2.937678  |
| 107 | 1  | 0 | -5.757185  | -3.131827 | 1.596756  |
| 108 | 6  | 0 | -9.170860  | -1.331251 | 1.938560  |
| 109 | 1  | 0 | -9.005687  | -0.952705 | -0.174900 |
| 110 | 6  | 0 | -8.547085  | -1.891668 | 3.047159  |
| 111 | 1  | 0 | -6.844446  | -2.963008 | 3.811038  |
| 112 | 1  | 0 | -10.125177 | -0.828583 | 2.042590  |
| 113 | 17 | 0 | -9.316775  | -1.778035 | 4.614453  |
| 114 | 6  | 0 | 5.825598   | -0.210855 | 2.094688  |
| 115 | 6  | 0 | 6.768764   | -0.985027 | 1.462066  |
| 116 | 1  | 0 | 6.797281   | -2.028431 | 1.190657  |
| 117 | 7  | 0 | 6.300988   | 1.063657  | 2.149828  |
| 118 | 7  | 0 | 7.473274   | 1.116790  | 1.595537  |
| 119 | 7  | 0 | 7.771640   | -0.122534 | 1.171658  |
| 120 | 6  | 0 | 8.988594   | -0.380983 | 0.484470  |
| 121 | 6  | 0 | 9.640002   | -1.594951 | 0.674786  |
| 122 | 6  | 0 | 9.498922   | 0.583766  | -0.379089 |
| 123 | 6  | 0 | 10.813772  | -1.857763 | -0.019844 |
| 124 | 1  | 0 | 9.248792   | -2.327774 | 1.372030  |
| 125 | 6  | 0 | 10.680301  | 0.327849  | -1.062709 |
| 126 | 1  | 0 | 8.973831   | 1.522275  | -0.513636 |
| 127 | 6  | 0 | 11.322433  | -0.892709 | -0.881612 |
| 128 | 1  | 0 | 11.331389  | -2.799602 | 0.118576  |
| 129 | 1  | 0 | 11.089882  | 1.067611  | -1.740496 |
| 130 | 17 | 0 | 12.800225  | -1.221534 | -1.755588 |
| 131 | 6  | 0 | 1.019597   | 0.241775  | -2.255234 |
| 132 | 6  | 0 | 0.714466   | 1.440720  | -2.858898 |
| 133 | 1  | 0 | 1.283716   | 2.110690  | -3.483553 |
| 134 | 7  | 0 | -0.061922  | -0.151305 | -1.541623 |
| 135 | 7  | 0 | -1.001982  | 0.730831  | -1.679238 |
| 136 | 7  | 0 | -0.551333  | 1.708940  | -2.478433 |
| 137 | 6  | 0 | -1.346634  | 2.844754  | -2.803781 |
| 138 | 6  | 0 | -1.519081  | 3.190732  | -4.139615 |
| 139 | 6  | 0 | -1.933033  | 3.576178  | -1.779875 |
| 140 | 6  | 0 | -2.298114  | 4.295018  | -4.458461 |
| 141 | 1  | 0 | -1.069273  | 2.590859  | -4.923292 |
| 142 | 6  | 0 | -2.726676  | 4.670662  | -2.097358 |
| 143 | 1  | 0 | -1.785315  | 3.285852  | -0.745007 |
| 144 | 6  | 0 | -2.900281  | 5.017270  | -3.432329 |

|     |    |   |           |           |           |
|-----|----|---|-----------|-----------|-----------|
| 145 | 1  | 0 | -2.454393 | 4.575250  | -5.493287 |
| 146 | 1  | 0 | -3.209169 | 5.238059  | -1.309799 |
| 147 | 17 | 0 | -3.901875 | 6.390354  | -3.833429 |
| 148 | 6  | 0 | -1.149190 | 0.346368  | 1.566106  |
| 149 | 6  | 0 | 0.189320  | 0.656539  | 1.584937  |
| 150 | 1  | 0 | 1.091086  | 0.064200  | 1.613242  |
| 151 | 7  | 0 | -1.827636 | 1.526479  | 1.507334  |
| 152 | 7  | 0 | -0.996594 | 2.526440  | 1.480426  |
| 153 | 7  | 0 | 0.231363  | 2.009392  | 1.528721  |
| 154 | 6  | 0 | 1.361920  | 2.868024  | 1.597685  |
| 155 | 6  | 0 | 2.512205  | 2.432147  | 2.249727  |
| 156 | 6  | 0 | 1.290071  | 4.139903  | 1.038591  |
| 157 | 6  | 0 | 3.605936  | 3.284969  | 2.361592  |
| 158 | 1  | 0 | 2.542784  | 1.452853  | 2.711584  |
| 159 | 6  | 0 | 2.373780  | 4.998404  | 1.166651  |
| 160 | 1  | 0 | 0.387972  | 4.462471  | 0.532925  |
| 161 | 6  | 0 | 3.517669  | 4.567428  | 1.832505  |
| 162 | 1  | 0 | 4.515428  | 2.944139  | 2.844141  |
| 163 | 1  | 0 | 2.326424  | 5.997319  | 0.749279  |
| 164 | 17 | 0 | 4.865061  | 5.661623  | 2.009462  |
| 165 | 30 | 0 | -3.996802 | 2.170400  | 1.927966  |
| 166 | 6  | 0 | -3.896777 | 4.077366  | 1.446934  |
| 167 | 1  | 0 | -3.066945 | 4.215921  | 0.739450  |
| 168 | 6  | 0 | -3.536009 | 4.889416  | 2.697570  |
| 169 | 1  | 0 | -3.421628 | 5.965247  | 2.483887  |
| 170 | 1  | 0 | -4.309451 | 4.809488  | 3.473903  |
| 171 | 1  | 0 | -2.593628 | 4.550508  | 3.146729  |
| 172 | 6  | 0 | -5.156231 | 4.643336  | 0.787298  |
| 173 | 1  | 0 | -6.045507 | 4.505760  | 1.416610  |
| 174 | 1  | 0 | -5.078598 | 5.726691  | 0.591342  |
| 175 | 1  | 0 | -5.369314 | 4.157951  | -0.172724 |
| 176 | 6  | 0 | -4.769483 | 0.719580  | 3.011330  |
| 177 | 1  | 0 | -4.732763 | -0.240337 | 2.471841  |
| 178 | 6  | 0 | -3.981711 | 0.552694  | 4.316222  |
| 179 | 1  | 0 | -2.913452 | 0.368648  | 4.142468  |
| 180 | 1  | 0 | -4.042743 | 1.458048  | 4.935697  |
| 181 | 1  | 0 | -4.358713 | -0.274688 | 4.939753  |
| 182 | 6  | 0 | -6.246266 | 0.985034  | 3.325315  |
| 183 | 1  | 0 | -6.862295 | 1.010896  | 2.418244  |



|     |   |   |           |          |          |
|-----|---|---|-----------|----------|----------|
| 184 | 1 | 0 | -6.679893 | 0.219637 | 3.988514 |
|-----|---|---|-----------|----------|----------|

|     |   |   |           |          |          |
|-----|---|---|-----------|----------|----------|
| 185 | 1 | 0 | -6.386019 | 1.950166 | 3.831665 |
|-----|---|---|-----------|----------|----------|

-----

Sum of electronic and zero-point Energies = -15309.608762

Sum of electronic and thermal Energies = -15309.493634

Sum of electronic and thermal Enthalpies = -15309.492689

Sum of electronic and thermal Free Energies = -15309.769716

Standard orientation:

| Center<br>Number | Atomic<br>Number | Atomic<br>Type | Coordinates (Angstroms) |           |           |
|------------------|------------------|----------------|-------------------------|-----------|-----------|
|                  |                  |                | X                       | Y         | Z         |
| 1                | 30               | 0              | 2.885450                | -1.361656 | 1.229470  |
| 2                | 6                | 0              | 3.978059                | -0.792348 | 2.770331  |
| 3                | 6                | 0              | 4.063046                | 0.721294  | 2.978096  |
| 4                | 6                | 0              | -2.312748               | -3.366130 | 0.464094  |
| 5                | 8                | 0              | -2.867795               | -2.310732 | -0.270243 |
| 6                | 30               | 0              | -3.691453               | -0.757476 | 0.641505  |
| 7                | 6                | 0              | -4.641375               | -1.253992 | 2.267186  |
| 8                | 6                | 0              | -5.225584               | -0.193268 | 3.194455  |
| 9                | 8                | 0              | 2.410342                | -0.895814 | -0.663501 |
| 10               | 30               | 0              | 2.551932                | -2.646249 | -1.464223 |
| 11               | 8                | 0              | 2.979689                | -3.171003 | 0.360986  |
| 12               | 6                | 0              | 3.922895                | -4.166334 | 0.655805  |
| 13               | 6                | 0              | 2.035676                | 0.348296  | -1.193839 |
| 14               | 6                | 0              | 1.344658                | 0.219017  | -2.563854 |
| 15               | 6                | 0              | 0.163610                | -0.750742 | -2.584219 |
| 16               | 6                | 0              | 0.961961                | 1.589572  | -3.124610 |
| 17               | 6                | 0              | 2.871852                | -3.494199 | -3.198510 |
| 18               | 6                | 0              | 1.827323                | -4.536406 | -3.605637 |
| 19               | 6                | 0              | 3.504173                | -5.505460 | 0.013157  |
| 20               | 6                | 0              | 4.520982                | -6.621291 | 0.248123  |
| 21               | 6                | 0              | 2.123422                | -5.901881 | 0.534357  |
| 22               | 6                | 0              | 5.388332                | -1.394084 | 2.734034  |
| 23               | 6                | 0              | -2.004195               | -4.593660 | -0.411168 |
| 24               | 6                | 0              | -1.667443               | -5.805581 | 0.458229  |
| 25               | 6                | 0              | -0.918447               | -4.354774 | -1.459820 |
| 26               | 30               | 0              | -2.864410               | -1.647831 | -2.077238 |
| 27               | 8                | 0              | -3.291164               | 0.051652  | -1.093982 |

|    |   |   |           |           |           |
|----|---|---|-----------|-----------|-----------|
| 28 | 6 | 0 | -4.188330 | 1.034903  | -1.594484 |
| 29 | 6 | 0 | -3.255899 | -2.498982 | -3.796150 |
| 30 | 6 | 0 | -2.674368 | -1.871407 | -5.062142 |
| 31 | 6 | 0 | -4.775310 | -2.671612 | -3.932765 |
| 32 | 6 | 0 | -5.733214 | -2.231935 | 1.805502  |
| 33 | 6 | 0 | -4.112237 | 1.134602  | -3.124048 |
| 34 | 6 | 0 | -2.693943 | 1.510605  | -3.548292 |
| 35 | 6 | 0 | -5.127765 | 2.131922  | -3.679236 |
| 36 | 1 | 0 | 2.934344  | 0.953045  | -1.369673 |
| 37 | 1 | 0 | 2.115235  | -0.200558 | -3.221825 |
| 38 | 1 | 0 | 0.609367  | 1.499034  | -4.157101 |
| 39 | 1 | 0 | 1.820947  | 2.269348  | -3.118497 |
| 40 | 1 | 0 | 0.164302  | 2.054242  | -2.535978 |
| 41 | 1 | 0 | -0.661765 | -0.379741 | -1.968789 |
| 42 | 1 | 0 | -0.203356 | -0.882452 | -3.606465 |
| 43 | 1 | 0 | 0.445117  | -1.731625 | -2.198150 |
| 44 | 1 | 0 | 3.823307  | -4.030781 | -3.054797 |
| 45 | 1 | 0 | 1.694114  | -5.313851 | -2.843742 |
| 46 | 1 | 0 | 2.099889  | -5.044807 | -4.543272 |
| 47 | 1 | 0 | 0.845034  | -4.074829 | -3.771664 |
| 48 | 1 | 0 | 3.960256  | -4.324516 | 1.746414  |
| 49 | 1 | 0 | 3.430220  | -5.322735 | -1.068498 |
| 50 | 1 | 0 | 1.708273  | -6.743693 | -0.029013 |
| 51 | 1 | 0 | 1.433446  | -5.058254 | 0.464303  |
| 52 | 1 | 0 | 2.181401  | -6.200594 | 1.588861  |
| 53 | 1 | 0 | 5.487632  | -6.403272 | -0.212279 |
| 54 | 1 | 0 | 4.152541  | -7.563741 | -0.170466 |
| 55 | 1 | 0 | 4.694572  | -6.775982 | 1.319134  |
| 56 | 1 | 0 | 3.493167  | -1.205530 | 3.667321  |
| 57 | 1 | 0 | 5.991667  | -1.052363 | 3.590226  |
| 58 | 1 | 0 | 5.939142  | -1.112247 | 1.828431  |
| 59 | 1 | 0 | 5.375572  | -2.488398 | 2.768565  |
| 60 | 1 | 0 | 3.080092  | 1.187980  | 3.090880  |
| 61 | 1 | 0 | 4.651436  | 0.980562  | 3.873180  |
| 62 | 1 | 0 | 4.543735  | 1.220311  | 2.130002  |
| 63 | 1 | 0 | -1.084895 | -3.428391 | -2.015744 |
| 64 | 1 | 0 | 0.070724  | -4.291188 | -0.998752 |
| 65 | 1 | 0 | -0.901096 | -5.174206 | -2.183527 |
| 66 | 1 | 0 | -2.946880 | -4.796846 | -0.937461 |

|     |   |   |           |           |           |
|-----|---|---|-----------|-----------|-----------|
| 67  | 1 | 0 | -0.762331 | -5.627977 | 1.048735  |
| 68  | 1 | 0 | -1.486500 | -6.689308 | -0.160670 |
| 69  | 1 | 0 | -2.481568 | -6.043482 | 1.151368  |
| 70  | 1 | 0 | -3.051385 | -3.696877 | 1.212202  |
| 71  | 1 | 0 | -5.035762 | -3.285973 | -4.807279 |
| 72  | 1 | 0 | -5.283200 | -1.707794 | -4.076308 |
| 73  | 1 | 0 | -5.222434 | -3.156729 | -3.055578 |
| 74  | 1 | 0 | -2.982445 | -2.423537 | -5.962951 |
| 75  | 1 | 0 | -3.003210 | -0.833939 | -5.202056 |
| 76  | 1 | 0 | -1.578702 | -1.866894 | -5.052557 |
| 77  | 1 | 0 | -2.830946 | -3.509904 | -3.715930 |
| 78  | 1 | 0 | -3.918970 | -1.839338 | 2.857227  |
| 79  | 1 | 0 | -6.517421 | -1.715520 | 1.239944  |
| 80  | 1 | 0 | -6.231143 | -2.719676 | 2.656510  |
| 81  | 1 | 0 | -5.342272 | -3.025896 | 1.156918  |
| 82  | 1 | 0 | -4.449024 | 0.445924  | 3.625902  |
| 83  | 1 | 0 | -5.769679 | -0.652393 | 4.034316  |
| 84  | 1 | 0 | -5.934903 | 0.460648  | 2.674273  |
| 85  | 1 | 0 | -3.910204 | 2.019910  | -1.186622 |
| 86  | 1 | 0 | -4.342046 | 0.138273  | -3.526097 |
| 87  | 1 | 0 | -4.975863 | 3.124919  | -3.244502 |
| 88  | 1 | 0 | -6.159123 | 1.836893  | -3.468873 |
| 89  | 1 | 0 | -5.018227 | 2.221125  | -4.764102 |
| 90  | 1 | 0 | -2.623275 | 1.624620  | -4.634080 |
| 91  | 1 | 0 | -2.397093 | 2.460808  | -3.089567 |
| 92  | 1 | 0 | -1.970019 | 0.754199  | -3.245288 |
| 93  | 6 | 0 | 3.086379  | -2.501201 | -4.345023 |
| 94  | 1 | 0 | 3.844315  | -1.743222 | -4.111381 |
| 95  | 1 | 0 | 3.407929  | -3.006161 | -5.268976 |
| 96  | 1 | 0 | 2.159163  | -1.966463 | -4.588561 |
| 97  | 6 | 0 | 5.297373  | -3.705479 | 0.245863  |
| 98  | 6 | 0 | 5.640054  | -2.752432 | -0.681142 |
| 99  | 1 | 0 | 5.069660  | -2.108549 | -1.329949 |
| 100 | 7 | 0 | 6.440887  | -4.123842 | 0.855635  |
| 101 | 7 | 0 | 7.457939  | -3.484408 | 0.362037  |
| 102 | 7 | 0 | 6.986055  | -2.646178 | -0.576040 |
| 103 | 6 | 0 | 7.841081  | -1.748165 | -1.264013 |
| 104 | 6 | 0 | 7.653436  | -1.535348 | -2.625577 |
| 105 | 6 | 0 | 8.814190  | -1.053329 | -0.553985 |

|     |    |   |            |           |           |
|-----|----|---|------------|-----------|-----------|
| 106 | 6  | 0 | 8.434295   | -0.595681 | -3.286437 |
| 107 | 1  | 0 | 6.901170   | -2.099038 | -3.167178 |
| 108 | 6  | 0 | 9.606274   | -0.124348 | -1.215023 |
| 109 | 1  | 0 | 8.931460   | -1.226866 | 0.509178  |
| 110 | 6  | 0 | 9.401916   | 0.101449  | -2.572079 |
| 111 | 1  | 0 | 8.293002   | -0.412261 | -4.344955 |
| 112 | 1  | 0 | 10.360622  | 0.434494  | -0.674078 |
| 113 | 17 | 0 | 10.382052  | 1.292732  | -3.398557 |
| 114 | 6  | 0 | -5.564444  | 0.741311  | -1.074794 |
| 115 | 6  | 0 | -6.465281  | -0.233413 | -1.435435 |
| 116 | 1  | 0 | -6.440416  | -1.010377 | -2.183163 |
| 117 | 7  | 0 | -6.093639  | 1.430801  | -0.027127 |
| 118 | 7  | 0 | -7.259290  | 0.944791  | 0.270312  |
| 119 | 7  | 0 | -7.500623  | -0.067295 | -0.578617 |
| 120 | 6  | 0 | -8.712749  | -0.805596 | -0.495032 |
| 121 | 6  | 0 | -9.272785  | -1.342802 | -1.649425 |
| 122 | 6  | 0 | -9.314049  | -0.983131 | 0.747643  |
| 123 | 6  | 0 | -10.445121 | -2.082409 | -1.560256 |
| 124 | 1  | 0 | -8.813028  | -1.176380 | -2.617483 |
| 125 | 6  | 0 | -10.494151 | -1.709127 | 0.835130  |
| 126 | 1  | 0 | -8.860039  | -0.556122 | 1.633998  |
| 127 | 6  | 0 | -11.045221 | -2.256878 | -0.318457 |
| 128 | 1  | 0 | -10.892560 | -2.507793 | -2.450726 |
| 129 | 1  | 0 | -10.974696 | -1.854940 | 1.795292  |
| 130 | 17 | 0 | -12.523436 | -3.182977 | -0.207026 |
| 131 | 6  | 0 | -1.141138  | -2.834381 | 1.248508  |
| 132 | 6  | 0 | -0.993496  | -2.730307 | 2.613508  |
| 133 | 1  | 0 | -1.609055  | -3.041116 | 3.442697  |
| 134 | 7  | 0 | -0.076933  | -2.223097 | 0.668493  |
| 135 | 7  | 0 | 0.702383   | -1.759721 | 1.595836  |
| 136 | 7  | 0 | 0.162053   | -2.056404 | 2.785343  |
| 137 | 6  | 0 | 0.748905   | -1.595761 | 3.999412  |
| 138 | 6  | 0 | 1.136956   | -2.515941 | 4.964817  |
| 139 | 6  | 0 | 0.927851   | -0.230450 | 4.179760  |
| 140 | 6  | 0 | 1.714913   | -2.058201 | 6.141884  |
| 141 | 1  | 0 | 1.006353   | -3.578254 | 4.790158  |
| 142 | 6  | 0 | 1.514559   | 0.229612  | 5.350163  |
| 143 | 1  | 0 | 0.635420   | 0.465044  | 3.401151  |
| 144 | 6  | 0 | 1.899120   | -0.690409 | 6.319528  |

|     |    |   |           |           |           |
|-----|----|---|-----------|-----------|-----------|
| 145 | 1  | 0 | 2.033521  | -2.758312 | 6.904741  |
| 146 | 1  | 0 | 1.685265  | 1.289103  | 5.498621  |
| 147 | 17 | 0 | 2.634618  | -0.115896 | 7.795219  |
| 148 | 6  | 0 | 1.256471  | 1.107865  | -0.156037 |
| 149 | 6  | 0 | -0.070904 | 1.120780  | 0.190470  |
| 150 | 1  | 0 | -0.938242 | 0.629576  | -0.220929 |
| 151 | 7  | 0 | 1.908759  | 1.923457  | 0.719186  |
| 152 | 7  | 0 | 1.072410  | 2.420596  | 1.577133  |
| 153 | 7  | 0 | -0.136266 | 1.945366  | 1.264732  |
| 154 | 6  | 0 | -1.279615 | 2.358240  | 1.998195  |
| 155 | 6  | 0 | -2.541784 | 2.194756  | 1.436367  |
| 156 | 6  | 0 | -1.125681 | 2.951535  | 3.248094  |
| 157 | 6  | 0 | -3.671075 | 2.615190  | 2.127791  |
| 158 | 1  | 0 | -2.648928 | 1.777909  | 0.442389  |
| 159 | 6  | 0 | -2.252865 | 3.376389  | 3.940719  |
| 160 | 1  | 0 | -0.136589 | 3.094866  | 3.665918  |
| 161 | 6  | 0 | -3.513680 | 3.202169  | 3.377993  |
| 162 | 1  | 0 | -4.651908 | 2.488255  | 1.678571  |
| 163 | 1  | 0 | -2.146765 | 3.841869  | 4.913693  |
| 164 | 17 | 0 | -4.927378 | 3.730150  | 4.258092  |
| 165 | 30 | 0 | 3.864064  | 3.136674  | 0.504856  |
| 166 | 6  | 0 | 3.720304  | 4.293780  | 2.107168  |
| 167 | 1  | 0 | 3.326241  | 3.657691  | 2.916251  |
| 168 | 6  | 0 | 5.100053  | 2.207551  | -0.742081 |
| 169 | 1  | 0 | 4.639440  | 2.215823  | -1.745362 |
| 170 | 6  | 0 | 5.413215  | 0.746926  | -0.397944 |
| 171 | 1  | 0 | 5.949142  | 0.240053  | -1.216701 |
| 172 | 1  | 0 | 6.072376  | 0.690109  | 0.477668  |
| 173 | 1  | 0 | 4.529132  | 0.146864  | -0.158068 |
| 174 | 6  | 0 | 6.431583  | 2.959519  | -0.872840 |
| 175 | 1  | 0 | 7.127792  | 2.457820  | -1.567828 |
| 176 | 1  | 0 | 6.293687  | 3.984406  | -1.228019 |
| 177 | 1  | 0 | 6.950746  | 3.020959  | 0.093463  |
| 178 | 6  | 0 | 2.771892  | 5.486966  | 1.983689  |
| 179 | 1  | 0 | 2.714642  | 6.081859  | 2.912520  |
| 180 | 1  | 0 | 3.091320  | 6.179637  | 1.192540  |
| 181 | 1  | 0 | 1.750339  | 5.169878  | 1.738475  |
| 182 | 6  | 0 | 5.109973  | 4.766416  | 2.549209  |
| 183 | 1  | 0 | 5.595864  | 5.377921  | 1.776617  |

|     |    |   |           |          |           |
|-----|----|---|-----------|----------|-----------|
| 184 | 1  | 0 | 5.082585  | 5.380914 | 3.466645  |
| 185 | 1  | 0 | 5.781749  | 3.922580 | 2.751741  |
| 186 | 8  | 0 | 4.808800  | 5.700563 | -1.927911 |
| 187 | 6  | 0 | 3.752161  | 5.859442 | -2.491753 |
| 188 | 1  | 0 | 3.676623  | 6.483720 | -3.404196 |
| 189 | 6  | 0 | 2.468310  | 5.301008 | -2.045307 |
| 190 | 6  | 0 | 1.220198  | 5.685608 | -2.480539 |
| 191 | 7  | 0 | 2.303782  | 4.369055 | -1.060228 |
| 192 | 1  | 0 | 0.894932  | 6.412248 | -3.208012 |
| 193 | 7  | 0 | 1.043813  | 4.174751 | -0.869752 |
| 194 | 7  | 0 | 0.368690  | 4.970894 | -1.720639 |
| 195 | 6  | 0 | -1.051527 | 5.030668 | -1.671823 |
| 196 | 6  | 0 | -1.776320 | 5.191512 | -2.847706 |
| 197 | 6  | 0 | -1.685495 | 4.956680 | -0.435937 |
| 198 | 6  | 0 | -3.160106 | 5.304540 | -2.785859 |
| 199 | 1  | 0 | -1.271727 | 5.216342 | -3.807411 |
| 200 | 6  | 0 | -3.069302 | 5.053518 | -0.375336 |
| 201 | 1  | 0 | -1.101446 | 4.839222 | 0.469394  |
| 202 | 6  | 0 | -3.793459 | 5.234862 | -1.549063 |
| 203 | 1  | 0 | -3.737412 | 5.435946 | -3.693473 |
| 204 | 1  | 0 | -3.576753 | 5.003163 | 0.580335  |
| 205 | 17 | 0 | -5.530525 | 5.378416 | -1.463010 |

---

# TS3(S)

Sum of electronic and zero-point Energies = -15309.571699

Sum of electronic and thermal Energies = -15309.457234

Sum of electronic and thermal Enthalpies = -15309.456290

Sum of electronic and thermal Free Energies = -15309.731573

Standard orientation:

| Center<br>Number | Atomic<br>Number | Atomic<br>Type | Coordinates (Angstroms) |           |           |
|------------------|------------------|----------------|-------------------------|-----------|-----------|
|                  |                  |                | X                       | Y         | Z         |
| 1                | 30               | 0              | 2.892399                | -2.413358 | 0.521498  |
| 2                | 6                | 0              | 4.253058                | -2.379603 | 1.946215  |
| 3                | 6                | 0              | 4.828314                | -0.984011 | 2.205533  |
| 4                | 6                | 0              | -2.528017               | -3.162296 | -0.275960 |
| 5                | 8                | 0              | -2.890811               | -1.827259 | -0.533676 |
| 6                | 30               | 0              | -3.937196               | -0.835642 | 0.834150  |
| 7                | 6                | 0              | -5.003165               | -1.949897 | 2.020882  |
| 8                | 6                | 0              | -5.582022               | -1.354465 | 3.299873  |
| 9                | 8                | 0              | 2.266719                | -1.103533 | -0.896589 |
| 10               | 30               | 0              | 2.178637                | -2.327229 | -2.404070 |
| 11               | 8                | 0              | 2.774881                | -3.602524 | -1.061488 |
| 12               | 6                | 0              | 3.701650                | -4.615105 | -1.342030 |
| 13               | 6                | 0              | 1.950691                | 0.255647  | -0.821614 |
| 14               | 6                | 0              | 1.198194                | 0.757652  | -2.073767 |
| 15               | 6                | 0              | -0.056687               | -0.047613 | -2.399716 |
| 16               | 6                | 0              | 0.877520                | 2.248022  | -1.974399 |
| 17               | 6                | 0              | 2.212451                | -2.363857 | -4.362622 |
| 18               | 6                | 0              | 1.058068                | -3.148551 | -4.992429 |
| 19               | 6                | 0              | 3.213278                | -5.493895 | -2.513092 |
| 20               | 6                | 0              | 4.146041                | -6.675806 | -2.774967 |
| 21               | 6                | 0              | 1.789436                | -5.978846 | -2.234135 |
| 22               | 6                | 0              | 5.405001                | -3.367849 | 1.731733  |
| 23               | 6                | 0              | -2.448167               | -4.017615 | -1.550506 |
| 24               | 6                | 0              | -2.100161               | -5.467929 | -1.214814 |
| 25               | 6                | 0              | -1.514828               | -3.461096 | -2.623290 |
| 26               | 30               | 0              | -3.480641               | -0.779031 | -2.039056 |
| 27               | 8                | 0              | -3.737368               | 0.518411  | -0.539534 |



|    |   |   |           |           |           |
|----|---|---|-----------|-----------|-----------|
| 28 | 6 | 0 | -4.513841 | 1.699630  | -0.601552 |
| 29 | 6 | 0 | -3.977997 | -0.944295 | -3.918624 |
| 30 | 6 | 0 | -3.145420 | -0.083385 | -4.871474 |
| 31 | 6 | 0 | -5.474312 | -0.723629 | -4.168410 |
| 32 | 6 | 0 | -6.115091 | -2.502266 | 1.115126  |
| 33 | 6 | 0 | -4.328484 | 2.413278  | -1.947094 |
| 34 | 6 | 0 | -2.840295 | 2.646156  | -2.204148 |
| 35 | 6 | 0 | -5.103987 | 3.729961  | -1.986007 |
| 36 | 1 | 0 | 2.874412  | 0.844257  | -0.773135 |
| 37 | 1 | 0 | 1.907139  | 0.619870  | -2.899204 |
| 38 | 1 | 0 | 0.473512  | 2.622393  | -2.920112 |
| 39 | 1 | 0 | 1.767498  | 2.836810  | -1.731977 |
| 40 | 1 | 0 | 0.134481  | 2.436013  | -1.192807 |
| 41 | 1 | 0 | -0.818494 | 0.057105  | -1.620662 |
| 42 | 1 | 0 | -0.490432 | 0.295190  | -3.344026 |
| 43 | 1 | 0 | 0.163700  | -1.110313 | -2.503771 |
| 44 | 1 | 0 | 3.138958  | -2.912813 | -4.592413 |
| 45 | 1 | 0 | 0.954632  | -4.155376 | -4.570250 |
| 46 | 1 | 0 | 1.187935  | -3.263961 | -6.079156 |
| 47 | 1 | 0 | 0.099406  | -2.635668 | -4.841520 |
| 48 | 1 | 0 | 3.796798  | -5.273851 | -0.463000 |
| 49 | 1 | 0 | 3.194059  | -4.858744 | -3.409713 |
| 50 | 1 | 0 | 1.397057  | -6.546608 | -3.084008 |
| 51 | 1 | 0 | 1.116502  | -5.142379 | -2.031517 |
| 52 | 1 | 0 | 1.771463  | -6.636598 | -1.355932 |
| 53 | 1 | 0 | 5.160978  | -6.356585 | -3.022565 |
| 54 | 1 | 0 | 3.766612  | -7.283144 | -3.603021 |
| 55 | 1 | 0 | 4.211884  | -7.321046 | -1.890822 |
| 56 | 1 | 0 | 3.748562  | -2.695731 | 2.869911  |
| 57 | 1 | 0 | 6.061051  | -3.416431 | 2.615028  |
| 58 | 1 | 0 | 6.045110  | -3.076359 | 0.891497  |
| 59 | 1 | 0 | 5.060644  | -4.388813 | 1.530503  |
| 60 | 1 | 0 | 4.059528  | -0.244092 | 2.459824  |
| 61 | 1 | 0 | 5.555716  | -0.982706 | 3.032302  |
| 62 | 1 | 0 | 5.360249  | -0.600877 | 1.325125  |
| 63 | 1 | 0 | -1.699007 | -2.397423 | -2.792315 |
| 64 | 1 | 0 | -0.467762 | -3.582074 | -2.337257 |
| 65 | 1 | 0 | -1.672720 | -3.981978 | -3.571723 |
| 66 | 1 | 0 | -3.469840 | -3.995489 | -1.956550 |

|     |   |   |           |           |           |
|-----|---|---|-----------|-----------|-----------|
| 67  | 1 | 0 | -1.080985 | -5.547839 | -0.821279 |
| 68  | 1 | 0 | -2.157092 | -6.093521 | -2.110375 |
| 69  | 1 | 0 | -2.786478 | -5.886356 | -0.470292 |
| 70  | 1 | 0 | -3.303519 | -3.624887 | 0.355302  |
| 71  | 1 | 0 | -5.742839 | -0.954007 | -5.209844 |
| 72  | 1 | 0 | -5.766217 | 0.322144  | -4.002183 |
| 73  | 1 | 0 | -6.105232 | -1.351520 | -3.527195 |
| 74  | 1 | 0 | -3.452438 | -0.230672 | -5.917499 |
| 75  | 1 | 0 | -3.249610 | 0.988663  | -4.659490 |
| 76  | 1 | 0 | -2.077537 | -0.323501 | -4.818264 |
| 77  | 1 | 0 | -3.767532 | -1.994225 | -4.169842 |
| 78  | 1 | 0 | -4.377944 | -2.808272 | 2.311748  |
| 79  | 1 | 0 | -6.788803 | -1.705988 | 0.775093  |
| 80  | 1 | 0 | -6.740541 | -3.241916 | 1.636431  |
| 81  | 1 | 0 | -5.716269 | -2.992682 | 0.217038  |
| 82  | 1 | 0 | -4.796334 | -1.062440 | 4.004311  |
| 83  | 1 | 0 | -6.231564 | -2.074285 | 3.821032  |
| 84  | 1 | 0 | -6.187020 | -0.463140 | 3.100407  |
| 85  | 1 | 0 | -4.167082 | 2.390983  | 0.183544  |
| 86  | 1 | 0 | -4.713783 | 1.750334  | -2.734941 |
| 87  | 1 | 0 | -4.761419 | 4.408551  | -1.195513 |
| 88  | 1 | 0 | -6.178094 | 3.579666  | -1.846342 |
| 89  | 1 | 0 | -4.960499 | 4.233889  | -2.946551 |
| 90  | 1 | 0 | -2.678447 | 3.196058  | -3.135576 |
| 91  | 1 | 0 | -2.397444 | 3.222681  | -1.383070 |
| 92  | 1 | 0 | -2.293878 | 1.703773  | -2.270337 |
| 93  | 6 | 0 | 2.335363  | -0.995267 | -5.038293 |
| 94  | 1 | 0 | 3.184381  | -0.413557 | -4.658606 |
| 95  | 1 | 0 | 2.473294  | -1.091076 | -6.126184 |
| 96  | 1 | 0 | 1.432231  | -0.389916 | -4.889774 |
| 97  | 6 | 0 | 5.055033  | -3.985371 | -1.564088 |
| 98  | 6 | 0 | 5.338828  | -2.651756 | -1.745205 |
| 99  | 1 | 0 | 4.728992  | -1.762363 | -1.778098 |
| 100 | 7 | 0 | 6.237388  | -4.654084 | -1.474191 |
| 101 | 7 | 0 | 7.222852  | -3.815750 | -1.588958 |
| 102 | 7 | 0 | 6.691830  | -2.591906 | -1.754042 |
| 103 | 6 | 0 | 7.518522  | -1.441406 | -1.836705 |
| 104 | 6 | 0 | 7.217724  | -0.441480 | -2.755319 |
| 105 | 6 | 0 | 8.609758  | -1.325983 | -0.981109 |

|     |    |   |            |           |           |
|-----|----|---|------------|-----------|-----------|
| 106 | 6  | 0 | 8.007530   | 0.700767  | -2.808741 |
| 107 | 1  | 0 | 6.379184   | -0.557400 | -3.434025 |
| 108 | 6  | 0 | 9.409016   | -0.192097 | -1.042589 |
| 109 | 1  | 0 | 8.821441   | -2.113927 | -0.268186 |
| 110 | 6  | 0 | 9.095413   | 0.812557  | -1.951654 |
| 111 | 1  | 0 | 7.779532   | 1.490518  | -3.514487 |
| 112 | 1  | 0 | 10.255357  | -0.083603 | -0.374841 |
| 113 | 17 | 0 | 10.083763  | 2.254543  | -2.009323 |
| 114 | 6  | 0 | -5.933474  | 1.355678  | -0.262838 |
| 115 | 6  | 0 | -6.943916  | 0.819708  | -1.024231 |
| 116 | 1  | 0 | -7.023666  | 0.588399  | -2.074458 |
| 117 | 7  | 0 | -6.358560  | 1.387878  | 1.030002  |
| 118 | 7  | 0 | -7.563123  | 0.912557  | 1.106486  |
| 119 | 7  | 0 | -7.934277  | 0.562499  | -0.135515 |
| 120 | 6  | 0 | -9.201859  | -0.037963 | -0.365689 |
| 121 | 6  | 0 | -9.871342  | 0.199373  | -1.561421 |
| 122 | 6  | 0 | -9.743468  | -0.868831 | 0.610993  |
| 123 | 6  | 0 | -11.094660 | -0.416483 | -1.793926 |
| 124 | 1  | 0 | -9.456952  | 0.872679  | -2.303773 |
| 125 | 6  | 0 | -10.973176 | -1.472787 | 0.385342  |
| 126 | 1  | 0 | -9.205378  | -1.038930 | 1.536151  |
| 127 | 6  | 0 | -11.633646 | -1.246732 | -0.817874 |
| 128 | 1  | 0 | -11.625910 | -0.241008 | -2.721854 |
| 129 | 1  | 0 | -11.407405 | -2.123499 | 1.135239  |
| 130 | 17 | 0 | -13.174439 | -2.019978 | -1.107402 |
| 131 | 6  | 0 | -1.281774  | -3.110615 | 0.566892  |
| 132 | 6  | 0 | -1.208385  | -2.993185 | 1.938050  |
| 133 | 1  | 0 | -1.958781  | -3.017049 | 2.713077  |
| 134 | 7  | 0 | -0.032203  | -2.951423 | 0.072706  |
| 135 | 7  | 0 | 0.791634   | -2.754726 | 1.056031  |
| 136 | 7  | 0 | 0.095679   | -2.767713 | 2.201267  |
| 137 | 6  | 0 | 0.688900   | -2.511920 | 3.471715  |
| 138 | 6  | 0 | 0.318230   | -3.295256 | 4.559661  |
| 139 | 6  | 0 | 1.587980   | -1.462376 | 3.613922  |
| 140 | 6  | 0 | 0.851359   | -3.019298 | 5.811608  |
| 141 | 1  | 0 | -0.371950  | -4.122078 | 4.431812  |
| 142 | 6  | 0 | 2.139323   | -1.196198 | 4.860013  |
| 143 | 1  | 0 | 1.877683   | -0.863102 | 2.760407  |
| 144 | 6  | 0 | 1.759013   | -1.973207 | 5.948627  |

|     |    |   |           |           |           |
|-----|----|---|-----------|-----------|-----------|
| 145 | 1  | 0 | 0.573904  | -3.621246 | 6.668873  |
| 146 | 1  | 0 | 2.856834  | -0.390870 | 4.972036  |
| 147 | 17 | 0 | 2.437874  | -1.634008 | 7.520186  |
| 148 | 6  | 0 | 1.222048  | 0.593971  | 0.451720  |
| 149 | 6  | 0 | -0.050434 | 0.319618  | 0.899030  |
| 150 | 1  | 0 | -0.857512 | -0.273727 | 0.495258  |
| 151 | 7  | 0 | 1.817324  | 1.359264  | 1.408064  |
| 152 | 7  | 0 | 0.997198  | 1.580007  | 2.393771  |
| 153 | 7  | 0 | -0.138148 | 0.953381  | 2.093733  |
| 154 | 6  | 0 | -1.264509 | 1.076383  | 2.954787  |
| 155 | 6  | 0 | -2.507841 | 1.352743  | 2.395570  |
| 156 | 6  | 0 | -1.096114 | 0.961633  | 4.328915  |
| 157 | 6  | 0 | -3.614486 | 1.513332  | 3.222374  |
| 158 | 1  | 0 | -2.594293 | 1.488339  | 1.321895  |
| 159 | 6  | 0 | -2.197844 | 1.130824  | 5.158595  |
| 160 | 1  | 0 | -0.116356 | 0.755337  | 4.744100  |
| 161 | 6  | 0 | -3.442685 | 1.403184  | 4.598833  |
| 162 | 1  | 0 | -4.592135 | 1.719507  | 2.794501  |
| 163 | 1  | 0 | -2.085683 | 1.050078  | 6.233361  |
| 164 | 17 | 0 | -4.818789 | 1.621906  | 5.649496  |
| 165 | 30 | 0 | 3.699507  | 2.532634  | 1.757415  |
| 166 | 6  | 0 | 3.980053  | 2.380796  | 3.703173  |
| 167 | 1  | 0 | 3.457393  | 1.472075  | 4.042787  |
| 168 | 6  | 0 | 5.093512  | 2.191307  | 0.073921  |
| 169 | 1  | 0 | 4.498663  | 1.303094  | 0.388317  |
| 170 | 6  | 0 | 6.527202  | 1.863631  | 0.466438  |
| 171 | 1  | 0 | 6.874021  | 0.908437  | 0.046122  |
| 172 | 1  | 0 | 7.223341  | 2.636274  | 0.116151  |
| 173 | 1  | 0 | 6.642896  | 1.808556  | 1.553103  |
| 174 | 6  | 0 | 4.901539  | 2.255942  | -1.436243 |
| 175 | 1  | 0 | 5.079906  | 1.288779  | -1.928210 |
| 176 | 1  | 0 | 3.894462  | 2.583784  | -1.719405 |
| 177 | 1  | 0 | 5.603851  | 2.964921  | -1.895178 |
| 178 | 6  | 0 | 3.312254  | 3.570684  | 4.401844  |
| 179 | 1  | 0 | 3.416323  | 3.523031  | 5.498831  |
| 180 | 1  | 0 | 3.761381  | 4.518323  | 4.080460  |
| 181 | 1  | 0 | 2.239860  | 3.627711  | 4.176877  |
| 182 | 6  | 0 | 5.444533  | 2.263300  | 4.127485  |
| 183 | 1  | 0 | 6.031835  | 3.109161  | 3.752504  |

|     |    |   |           |          |           |
|-----|----|---|-----------|----------|-----------|
| 184 | 1  | 0 | 5.561075  | 2.244497 | 5.224297  |
| 185 | 1  | 0 | 5.909242  | 1.348344 | 3.739938  |
| 186 | 8  | 0 | 5.555413  | 4.700999 | 1.583193  |
| 187 | 6  | 0 | 5.175063  | 4.372693 | 0.448026  |
| 188 | 1  | 0 | 5.877608  | 4.356233 | -0.403755 |
| 189 | 6  | 0 | 3.758974  | 4.731948 | 0.062227  |
| 190 | 6  | 0 | 3.169057  | 5.610504 | -0.805189 |
| 191 | 7  | 0 | 2.761334  | 4.136730 | 0.755901  |
| 192 | 1  | 0 | 3.569360  | 6.272627 | -1.554783 |
| 193 | 7  | 0 | 1.600125  | 4.575658 | 0.388420  |
| 194 | 7  | 0 | 1.831928  | 5.482056 | -0.566099 |
| 195 | 6  | 0 | 0.745507  | 6.131818 | -1.214344 |
| 196 | 6  | 0 | -0.499956 | 5.510772 | -1.242343 |
| 197 | 6  | 0 | 0.937180  | 7.371122 | -1.816719 |
| 198 | 6  | 0 | -1.561245 | 6.129277 | -1.887197 |
| 199 | 1  | 0 | -0.632729 | 4.550893 | -0.760389 |
| 200 | 6  | 0 | -0.121541 | 7.986181 | -2.473822 |
| 201 | 1  | 0 | 1.897189  | 7.871965 | -1.765674 |
| 202 | 6  | 0 | -1.361219 | 7.359075 | -2.504372 |
| 203 | 1  | 0 | -2.533122 | 5.650261 | -1.918255 |
| 204 | 1  | 0 | 0.018143  | 8.950399 | -2.948123 |
| 205 | 17 | 0 | -2.694683 | 8.129914 | -3.331124 |

---

Sum of electronic and zero-point Energies = -15309.664604

Sum of electronic and thermal Energies = -15309.550827

Sum of electronic and thermal Enthalpies = -15309.549883

Sum of electronic and thermal Free Energies = -15309.825010

Standard orientation:

| Center<br>Number | Atomic<br>Number | Atomic<br>Type | Coordinates (Angstroms) |           |           |
|------------------|------------------|----------------|-------------------------|-----------|-----------|
|                  |                  |                | X                       | Y         | Z         |
| 1                | 30               | 0              | 2.821614                | -0.183764 | 1.743477  |
| 2                | 6                | 0              | 4.137597                | 1.268409  | 1.921234  |
| 3                | 6                | 0              | 4.073266                | 2.288304  | 0.779082  |
| 4                | 6                | 0              | -2.375270               | -2.020681 | 2.201501  |
| 5                | 8                | 0              | -2.693481               | -1.657276 | 0.879897  |
| 6                | 30               | 0              | -4.108808               | -0.282036 | 0.591349  |
| 7                | 6                | 0              | -5.335747               | -0.041850 | 2.086791  |
| 8                | 6                | 0              | -6.171973               | 1.229350  | 2.195395  |
| 9                | 8                | 0              | 2.226933                | -1.007719 | 0.014189  |
| 10               | 30               | 0              | 2.431741                | -2.865864 | 0.484766  |
| 11               | 8                | 0              | 3.033114                | -2.105123 | 2.169182  |
| 12               | 6                | 0              | 3.894719                | -2.711620 | 3.088811  |
| 13               | 6                | 0              | 1.794063                | -0.364935 | -1.146687 |
| 14               | 6                | 0              | 1.204055                | -1.362484 | -2.166153 |
| 15               | 6                | 0              | 0.053261                | -2.188851 | -1.595529 |
| 16               | 6                | 0              | 0.790241                | -0.668575 | -3.462127 |
| 17               | 6                | 0              | 2.685048                | -4.644084 | -0.299615 |
| 18               | 6                | 0              | 1.573138                | -5.656177 | -0.014997 |
| 19               | 6                | 0              | 3.317807                | -4.071302 | 3.536731  |
| 20               | 6                | 0              | 4.248750                | -4.818309 | 4.490333  |
| 21               | 6                | 0              | 1.939591                | -3.856506 | 4.163648  |
| 22               | 6                | 0              | 5.546765                | 0.662116  | 1.982218  |
| 23               | 6                | 0              | -2.188039               | -3.534977 | 2.381021  |
| 24               | 6                | 0              | -1.993835               | -3.887253 | 3.854938  |
| 25               | 6                | 0              | -1.079139               | -4.128406 | 1.516678  |
| 26               | 30               | 0              | -3.046395               | -2.602159 | -0.780212 |
| 27               | 8                | 0              | -3.701031               | -0.777223 | -1.237642 |

|    |   |   |           |           |           |
|----|---|---|-----------|-----------|-----------|
| 28 | 6 | 0 | -4.516668 | -0.409374 | -2.337570 |
| 29 | 6 | 0 | -3.346681 | -4.439964 | -1.369779 |
| 30 | 6 | 0 | -2.569899 | -4.876588 | -2.613301 |
| 31 | 6 | 0 | -4.844377 | -4.718618 | -1.548626 |
| 32 | 6 | 0 | -6.231079 | -1.290238 | 2.051692  |
| 33 | 6 | 0 | -4.245004 | -1.284574 | -3.569592 |
| 34 | 6 | 0 | -2.755673 | -1.286766 | -3.905160 |
| 35 | 6 | 0 | -5.066149 | -0.815329 | -4.771544 |
| 36 | 1 | 0 | 2.650314  | 0.119103  | -1.640788 |
| 37 | 1 | 0 | 2.026334  | -2.052179 | -2.395724 |
| 38 | 1 | 0 | 0.468120  | -1.402099 | -4.207644 |
| 39 | 1 | 0 | 1.616125  | -0.096291 | -3.896270 |
| 40 | 1 | 0 | -0.038450 | 0.025530  | -3.295556 |
| 41 | 1 | 0 | -0.786843 | -1.539577 | -1.325987 |
| 42 | 1 | 0 | -0.292355 | -2.918957 | -2.333020 |
| 43 | 1 | 0 | 0.354957  | -2.733871 | -0.699994 |
| 44 | 1 | 0 | 3.591975  | -5.027828 | 0.194935  |
| 45 | 1 | 0 | 1.393769  | -5.788395 | 1.058128  |
| 46 | 1 | 0 | 1.811884  | -6.648002 | -0.428468 |
| 47 | 1 | 0 | 0.621357  | -5.348985 | -0.466879 |
| 48 | 1 | 0 | 3.984707  | -2.081151 | 3.988287  |
| 49 | 1 | 0 | 3.196865  | -4.671702 | 2.622675  |
| 50 | 1 | 0 | 1.427836  | -4.809909 | 4.330782  |
| 51 | 1 | 0 | 1.317304  | -3.230229 | 3.519318  |
| 52 | 1 | 0 | 2.033195  | -3.352411 | 5.133921  |
| 53 | 1 | 0 | 5.201590  | -5.073676 | 4.019322  |
| 54 | 1 | 0 | 3.781509  | -5.747766 | 4.831267  |
| 55 | 1 | 0 | 4.472242  | -4.211950 | 5.375805  |
| 56 | 1 | 0 | 3.978838  | 1.814238  | 2.862164  |
| 57 | 1 | 0 | 6.324413  | 1.439343  | 2.059112  |
| 58 | 1 | 0 | 5.777496  | 0.079376  | 1.079855  |
| 59 | 1 | 0 | 5.679071  | -0.010403 | 2.836401  |
| 60 | 1 | 0 | 3.118884  | 2.825246  | 0.723787  |
| 61 | 1 | 0 | 4.867920  | 3.048967  | 0.869353  |
| 62 | 1 | 0 | 4.208418  | 1.807690  | -0.198417 |
| 63 | 1 | 0 | -1.126532 | -3.727248 | 0.502279  |
| 64 | 1 | 0 | -0.091395 | -3.900946 | 1.924655  |
| 65 | 1 | 0 | -1.178595 | -5.215504 | 1.455232  |
| 66 | 1 | 0 | -3.141852 | -3.968206 | 2.046531  |

|     |   |   |           |           |           |
|-----|---|---|-----------|-----------|-----------|
| 67  | 1 | 0 | -1.064782 | -3.455111 | 4.242941  |
| 68  | 1 | 0 | -1.931822 | -4.971326 | 3.987914  |
| 69  | 1 | 0 | -2.821749 | -3.521684 | 4.472169  |
| 70  | 1 | 0 | -3.210200 | -1.738902 | 2.861717  |
| 71  | 1 | 0 | -5.036328 | -5.785576 | -1.735490 |
| 72  | 1 | 0 | -5.256281 | -4.177013 | -2.410476 |
| 73  | 1 | 0 | -5.434353 | -4.434828 | -0.667997 |
| 74  | 1 | 0 | -2.799549 | -5.917494 | -2.886446 |
| 75  | 1 | 0 | -2.809497 | -4.258690 | -3.488230 |
| 76  | 1 | 0 | -1.486135 | -4.820361 | -2.462440 |
| 77  | 1 | 0 | -3.002280 | -5.069570 | -0.536946 |
| 78  | 1 | 0 | -4.736443 | -0.107914 | 3.008132  |
| 79  | 1 | 0 | -6.852153 | -1.316577 | 1.147872  |
| 80  | 1 | 0 | -6.920775 | -1.326209 | 2.908338  |
| 81  | 1 | 0 | -5.649801 | -2.222162 | 2.067119  |
| 82  | 1 | 0 | -5.547627 | 2.112557  | 2.363289  |
| 83  | 1 | 0 | -6.880059 | 1.171700  | 3.036868  |
| 84  | 1 | 0 | -6.764174 | 1.416240  | 1.293653  |
| 85  | 1 | 0 | -4.281673 | 0.631754  | -2.612173 |
| 86  | 1 | 0 | -4.540616 | -2.314281 | -3.318686 |
| 87  | 1 | 0 | -4.819759 | 0.221657  | -5.027091 |
| 88  | 1 | 0 | -6.142639 | -0.865592 | -4.585697 |
| 89  | 1 | 0 | -4.848395 | -1.433057 | -5.647711 |
| 90  | 1 | 0 | -2.551057 | -1.915248 | -4.776844 |
| 91  | 1 | 0 | -2.403577 | -0.273624 | -4.127790 |
| 92  | 1 | 0 | -2.161832 | -1.664353 | -3.072375 |
| 93  | 6 | 0 | 2.975322  | -4.611345 | -1.804669 |
| 94  | 1 | 0 | 3.777139  | -3.910282 | -2.070789 |
| 95  | 1 | 0 | 3.271461  | -5.600626 | -2.186206 |
| 96  | 1 | 0 | 2.086656  | -4.310785 | -2.374349 |
| 97  | 6 | 0 | 5.275707  | -2.822138 | 2.500856  |
| 98  | 6 | 0 | 5.638561  | -3.003360 | 1.189839  |
| 99  | 1 | 0 | 5.069435  | -3.107549 | 0.281292  |
| 100 | 7 | 0 | 6.414525  | -2.686089 | 3.234635  |
| 101 | 7 | 0 | 7.448122  | -2.775845 | 2.454422  |
| 102 | 7 | 0 | 6.992869  | -2.967934 | 1.203393  |
| 103 | 6 | 0 | 7.895660  | -3.089387 | 0.116443  |
| 104 | 6 | 0 | 7.551104  | -3.863523 | -0.987937 |
| 105 | 6 | 0 | 9.120792  | -2.430884 | 0.174127  |



|     |    |   |            |           |           |
|-----|----|---|------------|-----------|-----------|
| 106 | 6  | 0 | 8.437559   | -3.974213 | -2.052199 |
| 107 | 1  | 0 | 6.606291   | -4.395456 | -1.016779 |
| 108 | 6  | 0 | 10.014587  | -2.554395 | -0.880529 |
| 109 | 1  | 0 | 9.367172   | -1.830860 | 1.041621  |
| 110 | 6  | 0 | 9.662945   | -3.321888 | -1.985771 |
| 111 | 1  | 0 | 8.179850   | -4.572614 | -2.918205 |
| 112 | 1  | 0 | 10.972336  | -2.048696 | -0.846277 |
| 113 | 17 | 0 | 10.786438  | -3.468775 | -3.320183 |
| 114 | 6  | 0 | -5.950186  | -0.423613 | -1.894716 |
| 115 | 6  | 0 | -6.865644  | -1.446393 | -1.831335 |
| 116 | 1  | 0 | -6.831695  | -2.480772 | -2.134356 |
| 117 | 7  | 0 | -6.515457  | 0.676224  | -1.324133 |
| 118 | 7  | 0 | -7.716714  | 0.392811  | -0.923496 |
| 119 | 7  | 0 | -7.945074  | -0.895080 | -1.226197 |
| 120 | 6  | 0 | -9.183226  | -1.510284 | -0.899027 |
| 121 | 6  | 0 | -9.731125  | -2.444621 | -1.771266 |
| 122 | 6  | 0 | -9.819289  | -1.176309 | 0.292758  |
| 123 | 6  | 0 | -10.926394 | -3.070507 | -1.442698 |
| 124 | 1  | 0 | -9.239616  | -2.671258 | -2.710938 |
| 125 | 6  | 0 | -11.022552 | -1.790340 | 0.615189  |
| 126 | 1  | 0 | -9.373948  | -0.446809 | 0.959345  |
| 127 | 6  | 0 | -11.560815 | -2.735741 | -0.251868 |
| 128 | 1  | 0 | -11.364490 | -3.800113 | -2.113307 |
| 129 | 1  | 0 | -11.530958 | -1.543004 | 1.539618  |
| 130 | 17 | 0 | -13.068005 | -3.518687 | 0.162598  |
| 131 | 6  | 0 | -1.213303  | -1.158878 | 2.615563  |
| 132 | 6  | 0 | -1.250422  | 0.023162  | 3.321867  |
| 133 | 1  | 0 | -2.043864  | 0.539637  | 3.839186  |
| 134 | 7  | 0 | 0.042542   | -1.311530 | 2.130624  |
| 135 | 7  | 0 | 0.766023   | -0.301514 | 2.502429  |
| 136 | 7  | 0 | -0.002165  | 0.525420  | 3.224318  |
| 137 | 6  | 0 | 0.513186   | 1.732216  | 3.774870  |
| 138 | 6  | 0 | 0.314071   | 2.002414  | 5.124127  |
| 139 | 6  | 0 | 1.205938   | 2.611252  | 2.952185  |
| 140 | 6  | 0 | 0.818588   | 3.178184  | 5.664220  |
| 141 | 1  | 0 | -0.216926  | 1.294341  | 5.751087  |
| 142 | 6  | 0 | 1.741523   | 3.769212  | 3.498705  |
| 143 | 1  | 0 | 1.337149   | 2.392870  | 1.897981  |
| 144 | 6  | 0 | 1.534761   | 4.044980  | 4.845498  |

|     |    |   |           |          |           |
|-----|----|---|-----------|----------|-----------|
| 145 | 1  | 0 | 0.672164  | 3.406617 | 6.713178  |
| 146 | 1  | 0 | 2.316462  | 4.445019 | 2.880081  |
| 147 | 17 | 0 | 2.189771  | 5.514863 | 5.521918  |
| 148 | 6  | 0 | 0.857946  | 0.775017 | -0.828431 |
| 149 | 6  | 0 | -0.386976 | 0.826893 | -0.229606 |
| 150 | 1  | 0 | -1.035319 | 0.071450 | 0.191855  |
| 151 | 7  | 0 | 1.202362  | 2.042788 | -1.167799 |
| 152 | 7  | 0 | 0.253641  | 2.857980 | -0.825114 |
| 153 | 7  | 0 | -0.715604 | 2.136856 | -0.239549 |
| 154 | 6  | 0 | -1.909175 | 2.787775 | 0.180879  |
| 155 | 6  | 0 | -3.127111 | 2.393664 | -0.362749 |
| 156 | 6  | 0 | -1.824058 | 3.857099 | 1.063912  |
| 157 | 6  | 0 | -4.288710 | 3.075142 | -0.020143 |
| 158 | 1  | 0 | -3.146728 | 1.598202 | -1.100449 |
| 159 | 6  | 0 | -2.981361 | 4.546917 | 1.404851  |
| 160 | 1  | 0 | -0.863213 | 4.159693 | 1.465587  |
| 161 | 6  | 0 | -4.198889 | 4.147921 | 0.861527  |
| 162 | 1  | 0 | -5.239313 | 2.769682 | -0.445873 |
| 163 | 1  | 0 | -2.933103 | 5.390018 | 2.083929  |
| 164 | 17 | 0 | -5.648127 | 5.019865 | 1.292147  |
| 165 | 30 | 0 | -0.351952 | 4.690429 | -2.158689 |
| 166 | 6  | 0 | -1.754336 | 3.924830 | -3.290922 |
| 167 | 1  | 0 | -2.727516 | 3.960641 | -2.781439 |
| 168 | 6  | 0 | -1.876924 | 4.745931 | -4.579422 |
| 169 | 1  | 0 | -2.631593 | 4.334557 | -5.269935 |
| 170 | 1  | 0 | -2.154687 | 5.786836 | -4.377322 |
| 171 | 1  | 0 | -0.926619 | 4.771162 | -5.129225 |
| 172 | 6  | 0 | -1.466393 | 2.460724 | -3.636461 |
| 173 | 1  | 0 | -2.204724 | 2.052737 | -4.347460 |
| 174 | 1  | 0 | -0.478922 | 2.341096 | -4.101928 |
| 175 | 1  | 0 | -1.476230 | 1.808680 | -2.753857 |
| 176 | 6  | 0 | 1.707156  | 5.962840 | 0.688045  |
| 177 | 1  | 0 | 1.454640  | 4.901874 | 0.832288  |
| 178 | 6  | 0 | 3.131859  | 6.218600 | 1.195020  |
| 179 | 1  | 0 | 3.546982  | 7.132977 | 0.753319  |
| 180 | 1  | 0 | 3.145957  | 6.365056 | 2.280633  |
| 181 | 1  | 0 | 3.815428  | 5.393555 | 0.978240  |
| 182 | 6  | 0 | 0.703981  | 6.807136 | 1.471136  |
| 183 | 1  | 0 | 0.712033  | 6.540624 | 2.534600  |

|     |    |   |           |           |           |
|-----|----|---|-----------|-----------|-----------|
| 184 | 1  | 0 | 0.951691  | 7.873178  | 1.395588  |
| 185 | 1  | 0 | -0.301336 | 6.671752  | 1.068844  |
| 186 | 8  | 0 | 0.221249  | 6.195591  | -1.212765 |
| 187 | 6  | 0 | 1.541212  | 6.244265  | -0.830263 |
| 188 | 1  | 0 | 1.956806  | 7.257014  | -1.005670 |
| 189 | 6  | 0 | 2.363076  | 5.266100  | -1.668567 |
| 190 | 6  | 0 | 3.629516  | 4.738203  | -1.621576 |
| 191 | 1  | 0 | 4.474066  | 4.909827  | -0.977654 |
| 192 | 7  | 0 | 1.722547  | 4.626989  | -2.685615 |
| 193 | 7  | 0 | 2.492376  | 3.749083  | -3.250018 |
| 194 | 7  | 0 | 3.656752  | 3.802918  | -2.608835 |
| 195 | 6  | 0 | 4.653083  | 2.821769  | -2.859879 |
| 196 | 6  | 0 | 5.982525  | 3.070068  | -2.539103 |
| 197 | 6  | 0 | 4.256792  | 1.585423  | -3.361749 |
| 198 | 6  | 0 | 6.924537  | 2.060300  | -2.695339 |
| 199 | 1  | 0 | 6.292341  | 4.039086  | -2.164194 |
| 200 | 6  | 0 | 5.197937  | 0.580364  | -3.530891 |
| 201 | 1  | 0 | 3.212460  | 1.417649  | -3.592168 |
| 202 | 6  | 0 | 6.522814  | 0.822638  | -3.183833 |
| 203 | 1  | 0 | 7.962276  | 2.237901  | -2.439312 |
| 204 | 1  | 0 | 4.897120  | -0.388607 | -3.912554 |
| 205 | 17 | 0 | 7.701226  | -0.456809 | -3.354960 |

---

Sum of electronic and zero-point Energies = -15309.601767

Sum of electronic and thermal Energies = -15309.486700

Sum of electronic and thermal Enthalpies = -15309.485756

Sum of electronic and thermal Free Energies = -15309.764728

Standard orientation:

| Center<br>Number | Atomic<br>Number | Atomic<br>Type | Coordinates (Angstroms) |           |           |
|------------------|------------------|----------------|-------------------------|-----------|-----------|
|                  |                  |                | X                       | Y         | Z         |
| 1                | 30               | 0              | 2.791179                | -0.109432 | 1.875882  |
| 2                | 6                | 0              | 4.043940                | 1.338563  | 2.314990  |
| 3                | 6                | 0              | 4.029689                | 2.420362  | 1.232825  |
| 4                | 6                | 0              | -2.269776               | -2.299552 | 1.913654  |
| 5                | 8                | 0              | -2.613559               | -1.810220 | 0.641060  |
| 6                | 30               | 0              | -4.109823               | -0.489499 | 0.490042  |
| 7                | 6                | 0              | -5.271674               | -0.486398 | 2.059446  |
| 8                | 6                | 0              | -6.247604               | 0.664893  | 2.280975  |
| 9                | 8                | 0              | 2.286086                | -0.661389 | 0.007000  |
| 10               | 30               | 0              | 2.538754                | -2.572762 | 0.194884  |
| 11               | 8                | 0              | 3.162190                | -2.045100 | 1.959189  |
| 12               | 6                | 0              | 3.982793                | -2.745215 | 2.848546  |
| 13               | 6                | 0              | 1.855741                | 0.149942  | -1.044053 |
| 14               | 6                | 0              | 1.372175                | -0.685708 | -2.245836 |
| 15               | 6                | 0              | 0.252093                | -1.649944 | -1.860889 |
| 16               | 6                | 0              | 0.957113                | 0.188813  | -3.428275 |
| 17               | 6                | 0              | 2.890567                | -4.171084 | -0.884685 |
| 18               | 6                | 0              | 1.730276                | -5.149969 | -1.072631 |
| 19               | 6                | 0              | 3.333112                | -4.098360 | 3.218609  |
| 20               | 6                | 0              | 4.217342                | -4.965189 | 4.114752  |
| 21               | 6                | 0              | 1.977944                | -3.846960 | 3.879400  |
| 22               | 6                | 0              | 5.452082                | 0.739264  | 2.427211  |
| 23               | 6                | 0              | -1.974379               | -3.806565 | 1.916352  |
| 24               | 6                | 0              | -1.838290               | -4.328493 | 3.346447  |
| 25               | 6                | 0              | -0.779632               | -4.219017 | 1.058954  |
| 26               | 30               | 0              | -2.780256               | -2.508516 | -1.163534 |
| 27               | 8                | 0              | -3.637659               | -0.727949 | -1.368916 |

|    |   |   |           |           |           |
|----|---|---|-----------|-----------|-----------|
| 28 | 6 | 0 | -4.512054 | -0.316637 | -2.407022 |
| 29 | 6 | 0 | -2.822727 | -4.246553 | -2.047153 |
| 30 | 6 | 0 | -2.166941 | -4.343113 | -3.424924 |
| 31 | 6 | 0 | -4.272902 | -4.745199 | -2.116611 |
| 32 | 6 | 0 | -6.010539 | -1.832714 | 2.008221  |
| 33 | 6 | 0 | -4.178479 | -1.002246 | -3.738627 |
| 34 | 6 | 0 | -2.712260 | -0.770632 | -4.103652 |
| 35 | 6 | 0 | -5.095162 | -0.503475 | -4.856113 |
| 36 | 1 | 0 | 2.690449  | 0.769245  | -1.400195 |
| 37 | 1 | 0 | 2.246934  | -1.280372 | -2.540409 |
| 38 | 1 | 0 | 0.813611  | -0.417535 | -4.327960 |
| 39 | 1 | 0 | 1.698263  | 0.962056  | -3.655772 |
| 40 | 1 | 0 | 0.013300  | 0.703945  | -3.224569 |
| 41 | 1 | 0 | -0.681524 | -1.098206 | -1.700709 |
| 42 | 1 | 0 | 0.080795  | -2.386035 | -2.651398 |
| 43 | 1 | 0 | 0.492087  | -2.185660 | -0.939436 |
| 44 | 1 | 0 | 3.666161  | -4.713255 | -0.320488 |
| 45 | 1 | 0 | 1.378626  | -5.556662 | -0.119046 |
| 46 | 1 | 0 | 2.019731  | -6.006714 | -1.700740 |
| 47 | 1 | 0 | 0.867197  | -4.679247 | -1.561345 |
| 48 | 1 | 0 | 4.095878  | -2.171002 | 3.782786  |
| 49 | 1 | 0 | 3.167140  | -4.628220 | 2.268266  |
| 50 | 1 | 0 | 1.438575  | -4.786956 | 4.035634  |
| 51 | 1 | 0 | 1.362700  | -3.186161 | 3.265056  |
| 52 | 1 | 0 | 2.111536  | -3.371997 | 4.859813  |
| 53 | 1 | 0 | 5.146198  | -5.261943 | 3.622382  |
| 54 | 1 | 0 | 3.684136  | -5.876299 | 4.405086  |
| 55 | 1 | 0 | 4.489119  | -4.430255 | 5.031863  |
| 56 | 1 | 0 | 3.804601  | 1.814839  | 3.276250  |
| 57 | 1 | 0 | 6.214833  | 1.506695  | 2.637059  |
| 58 | 1 | 0 | 5.755609  | 0.245624  | 1.494479  |
| 59 | 1 | 0 | 5.526834  | -0.014198 | 3.219627  |
| 60 | 1 | 0 | 3.069557  | 2.945036  | 1.158317  |
| 61 | 1 | 0 | 4.805239  | 3.187211  | 1.397099  |
| 62 | 1 | 0 | 4.218837  | 1.986060  | 0.244400  |
| 63 | 1 | 0 | -0.792127 | -3.712590 | 0.091182  |
| 64 | 1 | 0 | 0.166724  | -3.985612 | 1.552988  |
| 65 | 1 | 0 | -0.805373 | -5.296032 | 0.870599  |
| 66 | 1 | 0 | -2.875189 | -4.254801 | 1.472617  |

|     |   |   |           |           |           |
|-----|---|---|-----------|-----------|-----------|
| 67  | 1 | 0 | -0.985407 | -3.865044 | 3.854125  |
| 68  | 1 | 0 | -1.674325 | -5.410196 | 3.349015  |
| 69  | 1 | 0 | -2.737809 | -4.124251 | 3.937166  |
| 70  | 1 | 0 | -3.125609 | -2.159397 | 2.591714  |
| 71  | 1 | 0 | -4.328410 | -5.780693 | -2.483359 |
| 72  | 1 | 0 | -4.873454 | -4.141962 | -2.811359 |
| 73  | 1 | 0 | -4.776031 | -4.721602 | -1.141563 |
| 74  | 1 | 0 | -2.269046 | -5.354011 | -3.847324 |
| 75  | 1 | 0 | -2.617638 | -3.652678 | -4.148553 |
| 76  | 1 | 0 | -1.094666 | -4.120305 | -3.391887 |
| 77  | 1 | 0 | -2.280586 | -4.934508 | -1.383949 |
| 78  | 1 | 0 | -4.609702 | -0.520186 | 2.938983  |
| 79  | 1 | 0 | -6.725437 | -1.866067 | 1.176837  |
| 80  | 1 | 0 | -6.586044 | -2.022088 | 2.926299  |
| 81  | 1 | 0 | -5.326948 | -2.681906 | 1.874177  |
| 82  | 1 | 0 | -5.723773 | 1.604439  | 2.480521  |
| 83  | 1 | 0 | -6.904633 | 0.473742  | 3.143832  |
| 84  | 1 | 0 | -6.894791 | 0.835114  | 1.414001  |
| 85  | 1 | 0 | -4.392729 | 0.768003  | -2.558667 |
| 86  | 1 | 0 | -4.338941 | -2.082805 | -3.605386 |
| 87  | 1 | 0 | -4.968329 | 0.574148  | -5.009380 |
| 88  | 1 | 0 | -6.151151 | -0.689134 | -4.640475 |
| 89  | 1 | 0 | -4.853583 | -1.002620 | -5.799005 |
| 90  | 1 | 0 | -2.473312 | -1.232219 | -5.065913 |
| 91  | 1 | 0 | -2.495046 | 0.301165  | -4.181436 |
| 92  | 1 | 0 | -2.036849 | -1.192126 | -3.357377 |
| 93  | 6 | 0 | 3.496318  | -3.818494 | -2.249323 |
| 94  | 1 | 0 | 4.314225  | -3.088024 | -2.183162 |
| 95  | 1 | 0 | 3.895179  | -4.706826 | -2.762601 |
| 96  | 1 | 0 | 2.743383  | -3.384999 | -2.919348 |
| 97  | 6 | 0 | 5.362516  | -2.908570 | 2.269079  |
| 98  | 6 | 0 | 5.750218  | -2.975863 | 0.954757  |
| 99  | 1 | 0 | 5.216314  | -2.875822 | 0.025095  |
| 100 | 7 | 0 | 6.478038  | -3.042101 | 3.040244  |
| 101 | 7 | 0 | 7.516930  | -3.200843 | 2.279769  |
| 102 | 7 | 0 | 7.091833  | -3.164761 | 1.004584  |
| 103 | 6 | 0 | 8.003324  | -3.327213 | -0.067999 |
| 104 | 6 | 0 | 7.553823  | -3.821980 | -1.289026 |
| 105 | 6 | 0 | 9.338594  | -2.975025 | 0.111342  |

|     |    |   |            |           |           |
|-----|----|---|------------|-----------|-----------|
| 106 | 6  | 0 | 8.443234   | -3.946358 | -2.349340 |
| 107 | 1  | 0 | 6.520249   | -4.124845 | -1.418751 |
| 108 | 6  | 0 | 10.231666  | -3.114985 | -0.942315 |
| 109 | 1  | 0 | 9.669169   | -2.588808 | 1.067787  |
| 110 | 6  | 0 | 9.774044   | -3.592406 | -2.165935 |
| 111 | 1  | 0 | 8.102299   | -4.328581 | -3.304409 |
| 112 | 1  | 0 | 11.273069  | -2.844048 | -0.813458 |
| 113 | 17 | 0 | 10.896683  | -3.753464 | -3.498809 |
| 114 | 6  | 0 | -5.923402  | -0.531796 | -1.944817 |
| 115 | 6  | 0 | -6.678820  | -1.678175 | -1.868926 |
| 116 | 1  | 0 | -6.497995  | -2.696798 | -2.173122 |
| 117 | 7  | 0 | -6.632913  | 0.472530  | -1.359771 |
| 118 | 7  | 0 | -7.771421  | 0.015326  | -0.937129 |
| 119 | 7  | 0 | -7.814086  | -1.292124 | -1.239258 |
| 120 | 6  | 0 | -8.940024  | -2.079996 | -0.877038 |
| 121 | 6  | 0 | -9.360440  | -3.107228 | -1.715286 |
| 122 | 6  | 0 | -9.596417  | -1.811754 | 0.320527  |
| 123 | 6  | 0 | -10.446658 | -3.890315 | -1.345363 |
| 124 | 1  | 0 | -8.859475  | -3.287775 | -2.660264 |
| 125 | 6  | 0 | -10.691295 | -2.584483 | 0.683851  |
| 126 | 1  | 0 | -9.249610  | -1.008232 | 0.959669  |
| 127 | 6  | 0 | -11.101843 | -3.619877 | -0.149383 |
| 128 | 1  | 0 | -10.787189 | -4.692304 | -1.989628 |
| 129 | 1  | 0 | -11.212418 | -2.389045 | 1.613522  |
| 130 | 17 | 0 | -12.472363 | -4.600889 | 0.315472  |
| 131 | 6  | 0 | -1.180080  | -1.405645 | 2.443737  |
| 132 | 6  | 0 | -1.314647  | -0.300593 | 3.257157  |
| 133 | 1  | 0 | -2.154183  | 0.114333  | 3.792942  |
| 134 | 7  | 0 | 0.094652   | -1.426677 | 1.987118  |
| 135 | 7  | 0 | 0.736183   | -0.410163 | 2.473634  |
| 136 | 7  | 0 | -0.102397  | 0.292765  | 3.243511  |
| 137 | 6  | 0 | 0.292292   | 1.515605  | 3.858966  |
| 138 | 6  | 0 | 0.037106   | 1.713551  | 5.210511  |
| 139 | 6  | 0 | 0.900866   | 2.496679  | 3.084275  |
| 140 | 6  | 0 | 0.391152   | 2.920997  | 5.799349  |
| 141 | 1  | 0 | -0.421809  | 0.928444  | 5.801559  |
| 142 | 6  | 0 | 1.272445   | 3.696728  | 3.674517  |
| 143 | 1  | 0 | 1.084852   | 2.331757  | 2.029484  |
| 144 | 6  | 0 | 1.007975   | 3.898626  | 5.025040  |

|     |    |   |           |          |           |
|-----|----|---|-----------|----------|-----------|
| 145 | 1  | 0 | 0.201448  | 3.093417 | 6.852005  |
| 146 | 1  | 0 | 1.755117  | 4.466273 | 3.084441  |
| 147 | 17 | 0 | 1.461260  | 5.413647 | 5.763136  |
| 148 | 6  | 0 | 0.822237  | 1.147206 | -0.592742 |
| 149 | 6  | 0 | -0.447435 | 0.989726 | -0.072953 |
| 150 | 1  | 0 | -1.040973 | 0.120578 | 0.173949  |
| 151 | 7  | 0 | 1.065550  | 2.480057 | -0.693540 |
| 152 | 7  | 0 | 0.030154  | 3.137025 | -0.270775 |
| 153 | 7  | 0 | -0.894250 | 2.248350 | 0.122562  |
| 154 | 6  | 0 | -2.179787 | 2.712083 | 0.520707  |
| 155 | 6  | 0 | -3.290397 | 2.328711 | -0.222664 |
| 156 | 6  | 0 | -2.288543 | 3.606986 | 1.577942  |
| 157 | 6  | 0 | -4.540985 | 2.851338 | 0.087122  |
| 158 | 1  | 0 | -3.159442 | 1.666201 | -1.071431 |
| 159 | 6  | 0 | -3.532965 | 4.148230 | 1.879316  |
| 160 | 1  | 0 | -1.406532 | 3.895526 | 2.139017  |
| 161 | 6  | 0 | -4.642429 | 3.769283 | 1.128720  |
| 162 | 1  | 0 | -5.415036 | 2.546515 | -0.480536 |
| 163 | 1  | 0 | -3.635481 | 4.864554 | 2.686013  |
| 164 | 17 | 0 | -6.197234 | 4.466809 | 1.501690  |
| 165 | 30 | 0 | -0.636178 | 5.156855 | -1.060985 |
| 166 | 6  | 0 | -1.811855 | 4.518130 | -2.507852 |
| 167 | 1  | 0 | -2.782591 | 4.339880 | -2.014764 |
| 168 | 6  | 0 | -2.061971 | 5.558413 | -3.604202 |
| 169 | 1  | 0 | -2.816593 | 5.214792 | -4.330756 |
| 170 | 1  | 0 | -2.418298 | 6.512772 | -3.197478 |
| 171 | 1  | 0 | -1.147819 | 5.772493 | -4.167301 |
| 172 | 6  | 0 | -1.385686 | 3.193610 | -3.150058 |
| 173 | 1  | 0 | -2.103929 | 2.863101 | -3.919152 |
| 174 | 1  | 0 | -0.410207 | 3.279423 | -3.644571 |
| 175 | 1  | 0 | -1.301444 | 2.377046 | -2.423029 |
| 176 | 6  | 0 | 0.045851  | 6.303822 | 0.384190  |
| 177 | 1  | 0 | -0.555352 | 5.968031 | 1.247614  |
| 178 | 6  | 0 | 1.507259  | 6.070141 | 0.776437  |
| 179 | 1  | 0 | 2.198521  | 6.500245 | 0.039467  |
| 180 | 1  | 0 | 1.766063  | 6.544802 | 1.737031  |
| 181 | 1  | 0 | 1.750531  | 5.002526 | 0.852610  |
| 182 | 6  | 0 | -0.232412 | 7.800241 | 0.218506  |
| 183 | 1  | 0 | 0.071508  | 8.386683 | 1.101019  |



|     |    |   |           |           |           |
|-----|----|---|-----------|-----------|-----------|
| 184 | 1  | 0 | 0.303443  | 8.225827  | -0.640226 |
| 185 | 1  | 0 | -1.296962 | 8.000598  | 0.049113  |
| 186 | 8  | 0 | 0.844489  | 7.032486  | -3.776576 |
| 187 | 6  | 0 | 1.581971  | 6.584295  | -2.926616 |
| 188 | 1  | 0 | 1.828887  | 7.165701  | -2.017265 |
| 189 | 6  | 0 | 2.266624  | 5.287316  | -3.008325 |
| 190 | 6  | 0 | 3.279388  | 4.837518  | -2.189341 |
| 191 | 1  | 0 | 3.721178  | 5.247536  | -1.295768 |
| 192 | 7  | 0 | 2.066433  | 4.355778  | -3.988861 |
| 193 | 7  | 0 | 2.896091  | 3.385897  | -3.821659 |
| 194 | 7  | 0 | 3.657945  | 3.668497  | -2.734062 |
| 195 | 6  | 0 | 4.730176  | 2.817117  | -2.353754 |
| 196 | 6  | 0 | 5.778150  | 3.330224  | -1.596097 |
| 197 | 6  | 0 | 4.720661  | 1.480264  | -2.742180 |
| 198 | 6  | 0 | 6.803976  | 2.492048  | -1.181610 |
| 199 | 1  | 0 | 5.806875  | 4.378476  | -1.322395 |
| 200 | 6  | 0 | 5.750829  | 0.642697  | -2.335751 |
| 201 | 1  | 0 | 3.916709  | 1.100040  | -3.359768 |
| 202 | 6  | 0 | 6.778571  | 1.152982  | -1.549857 |
| 203 | 1  | 0 | 7.615346  | 2.880884  | -0.578148 |
| 204 | 1  | 0 | 5.753048  | -0.400320 | -2.630051 |
| 205 | 17 | 0 | 8.068838  | 0.096812  | -1.035018 |

---

# TS3(R)

Sum of electronic and zero-point Energies = -15309.579221

Sum of electronic and thermal Energies = -15309.464715

Sum of electronic and thermal Enthalpies = -15309.463771

Sum of electronic and thermal Free Energies = -15309.739560

Standard orientation:

| Center<br>Number | Atomic<br>Number | Atomic<br>Type | Coordinates (Angstroms) |           |           |
|------------------|------------------|----------------|-------------------------|-----------|-----------|
|                  |                  |                | X                       | Y         | Z         |
| 1                | 30               | 0              | 2.974960                | -0.826881 | 1.225090  |
| 2                | 6                | 0              | 4.185337                | 0.272897  | 2.330526  |
| 3                | 6                | 0              | 5.542798                | 0.592702  | 1.698459  |
| 4                | 6                | 0              | -2.243163               | -2.842806 | 1.415750  |
| 5                | 8                | 0              | -2.839485               | -2.131374 | 0.366300  |
| 6                | 30               | 0              | -3.704722               | -0.377996 | 0.725313  |
| 7                | 6                | 0              | -4.565279               | -0.286720 | 2.463899  |
| 8                | 6                | 0              | -5.106100               | 1.043418  | 2.976996  |
| 9                | 8                | 0              | 2.431343                | -1.084372 | -0.702266 |
| 10               | 30               | 0              | 2.677582                | -2.985930 | -0.827559 |
| 11               | 8                | 0              | 3.100843                | -2.821309 | 1.059753  |
| 12               | 6                | 0              | 4.065569                | -3.585009 | 1.735322  |
| 13               | 6                | 0              | 1.885419                | -0.156438 | -1.596751 |
| 14               | 6                | 0              | 1.186628                | -0.805859 | -2.796599 |
| 15               | 6                | 0              | 0.106739                | -1.811157 | -2.408811 |
| 16               | 6                | 0              | 0.674967                | 0.253433  | -3.772700 |
| 17               | 6                | 0              | 2.899847                | -4.416885 | -2.137847 |
| 18               | 6                | 0              | 1.836862                | -5.513904 | -2.022918 |
| 19               | 6                | 0              | 3.816222                | -5.094858 | 1.546367  |
| 20               | 6                | 0              | 4.840992                | -5.930661 | 2.312703  |
| 21               | 6                | 0              | 2.392564                | -5.450972 | 1.972206  |
| 22               | 6                | 0              | 4.426465                | -0.375904 | 3.700293  |
| 23               | 6                | 0              | -1.935441               | -4.305877 | 1.050312  |
| 24               | 6                | 0              | -1.466630               | -5.082720 | 2.280653  |
| 25               | 6                | 0              | -0.950317               | -4.455907 | -0.105393 |
| 26               | 30               | 0              | -3.092412               | -2.223882 | -1.533768 |
| 27               | 8                | 0              | -3.483511               | -0.273850 | -1.210198 |

|    |   |   |           |           |           |
|----|---|---|-----------|-----------|-----------|
| 28 | 6 | 0 | -4.445994 | 0.446800  | -1.964456 |
| 29 | 6 | 0 | -3.520509 | -3.589942 | -2.866661 |
| 30 | 6 | 0 | -2.990274 | -3.385777 | -4.286383 |
| 31 | 6 | 0 | -5.032464 | -3.852854 | -2.906789 |
| 32 | 6 | 0 | -5.677845 | -1.344124 | 2.411741  |
| 33 | 6 | 0 | -4.377550 | 0.081013  | -3.452369 |
| 34 | 6 | 0 | -2.952467 | 0.279283  | -3.966608 |
| 35 | 6 | 0 | -5.378156 | 0.900504  | -4.266084 |
| 36 | 1 | 0 | 2.688487  | 0.463956  | -2.024035 |
| 37 | 1 | 0 | 1.981770  | -1.366083 | -3.304592 |
| 38 | 1 | 0 | 0.302464  | -0.213755 | -4.689532 |
| 39 | 1 | 0 | 1.470337  | 0.953865  | -4.047544 |
| 40 | 1 | 0 | -0.140659 | 0.840196  | -3.339214 |
| 41 | 1 | 0 | -0.750224 | -1.323585 | -1.930280 |
| 42 | 1 | 0 | -0.253715 | -2.347639 | -3.290900 |
| 43 | 1 | 0 | 0.489704  | -2.548757 | -1.702118 |
| 44 | 1 | 0 | 3.866488  | -4.881900 | -1.886739 |
| 45 | 1 | 0 | 1.771930  | -5.932856 | -1.011769 |
| 46 | 1 | 0 | 2.039593  | -6.350401 | -2.709083 |
| 47 | 1 | 0 | 0.840554  | -5.132202 | -2.280242 |
| 48 | 1 | 0 | 4.004412  | -3.376534 | 2.815150  |
| 49 | 1 | 0 | 3.923516  | -5.306907 | 0.472450  |
| 50 | 1 | 0 | 2.177430  | -6.507779 | 1.783288  |
| 51 | 1 | 0 | 1.657816  | -4.845869 | 1.437452  |
| 52 | 1 | 0 | 2.256136  | -5.268183 | 3.045637  |
| 53 | 1 | 0 | 5.865730  | -5.718491 | 1.995696  |
| 54 | 1 | 0 | 4.656114  | -6.999019 | 2.162829  |
| 55 | 1 | 0 | 4.781540  | -5.728075 | 3.388437  |
| 56 | 1 | 0 | 3.685248  | 1.235126  | 2.516477  |
| 57 | 1 | 0 | 5.002103  | 0.284598  | 4.367548  |
| 58 | 1 | 0 | 5.009759  | -1.299446 | 3.603379  |
| 59 | 1 | 0 | 3.498581  | -0.631474 | 4.223245  |
| 60 | 1 | 0 | 5.452917  | 1.139362  | 0.756370  |
| 61 | 1 | 0 | 6.168100  | 1.203634  | 2.368436  |
| 62 | 1 | 0 | 6.110935  | -0.320128 | 1.489154  |
| 63 | 1 | 0 | -1.257094 | -3.859538 | -0.967485 |
| 64 | 1 | 0 | 0.053398  | -4.132109 | 0.181859  |
| 65 | 1 | 0 | -0.892947 | -5.499301 | -0.427251 |
| 66 | 1 | 0 | -2.900745 | -4.720568 | 0.727464  |

|     |   |   |           |           |           |
|-----|---|---|-----------|-----------|-----------|
| 67  | 1 | 0 | -0.520261 | -4.684492 | 2.662785  |
| 68  | 1 | 0 | -1.303672 | -6.136404 | 2.035890  |
| 69  | 1 | 0 | -2.204368 | -5.038174 | 3.089294  |
| 70  | 1 | 0 | -2.954032 | -2.879359 | 2.257575  |
| 71  | 1 | 0 | -5.272200 | -4.734947 | -3.518319 |
| 72  | 1 | 0 | -5.575968 | -3.012669 | -3.361031 |
| 73  | 1 | 0 | -5.458585 | -4.029562 | -1.910929 |
| 74  | 1 | 0 | -3.269393 | -4.224366 | -4.941423 |
| 75  | 1 | 0 | -3.392827 | -2.477388 | -4.750928 |
| 76  | 1 | 0 | -1.898679 | -3.307600 | -4.318083 |
| 77  | 1 | 0 | -3.053524 | -4.507038 | -2.479018 |
| 78  | 1 | 0 | -3.818462 | -0.640462 | 3.191524  |
| 79  | 1 | 0 | -6.485773 | -1.033784 | 1.739128  |
| 80  | 1 | 0 | -6.137597 | -1.504400 | 3.398198  |
| 81  | 1 | 0 | -5.316745 | -2.317902 | 2.056698  |
| 82  | 1 | 0 | -4.304692 | 1.770606  | 3.140555  |
| 83  | 1 | 0 | -5.634250 | 0.920195  | 3.935064  |
| 84  | 1 | 0 | -5.817689 | 1.493073  | 2.274806  |
| 85  | 1 | 0 | -4.231874 | 1.524755  | -1.892980 |
| 86  | 1 | 0 | -4.634641 | -0.983363 | -3.546437 |
| 87  | 1 | 0 | -5.195141 | 1.974743  | -4.145650 |
| 88  | 1 | 0 | -6.410823 | 0.708469  | -3.961959 |
| 89  | 1 | 0 | -5.292642 | 0.664684  | -5.330726 |
| 90  | 1 | 0 | -2.882252 | 0.065786  | -5.036809 |
| 91  | 1 | 0 | -2.626639 | 1.314698  | -3.807687 |
| 92  | 1 | 0 | -2.243819 | -0.370453 | -3.449344 |
| 93  | 6 | 0 | 2.999854  | -3.940092 | -3.589814 |
| 94  | 1 | 0 | 3.769668  | -3.171109 | -3.728268 |
| 95  | 1 | 0 | 3.241756  | -4.766826 | -4.275300 |
| 96  | 1 | 0 | 2.050614  | -3.514038 | -3.938934 |
| 97  | 6 | 0 | 5.442093  | -3.165285 | 1.292910  |
| 98  | 6 | 0 | 5.875563  | -2.852919 | 0.027253  |
| 99  | 1 | 0 | 5.395827  | -2.835327 | -0.937923 |
| 100 | 7 | 0 | 6.474083  | -2.945909 | 2.152455  |
| 101 | 7 | 0 | 7.504618  | -2.503904 | 1.494008  |
| 102 | 7 | 0 | 7.152982  | -2.440138 | 0.199021  |
| 103 | 6 | 0 | 8.016906  | -1.876463 | -0.775974 |
| 104 | 6 | 0 | 8.114537  | -2.473101 | -2.027772 |
| 105 | 6 | 0 | 8.698975  | -0.700412 | -0.482644 |

|     |    |   |            |           |           |
|-----|----|---|------------|-----------|-----------|
| 106 | 6  | 0 | 8.899507   | -1.881486 | -3.009392 |
| 107 | 1  | 0 | 7.584425   | -3.396695 | -2.234606 |
| 108 | 6  | 0 | 9.491476   | -0.111300 | -1.459121 |
| 109 | 1  | 0 | 8.588681   | -0.241313 | 0.492828  |
| 110 | 6  | 0 | 9.579954   | -0.705727 | -2.713493 |
| 111 | 1  | 0 | 8.984858   | -2.334201 | -3.990134 |
| 112 | 1  | 0 | 10.015351  | 0.814386  | -1.252490 |
| 113 | 17 | 0 | 10.563518  | 0.045695  | -3.950492 |
| 114 | 6  | 0 | -5.799469  | 0.255519  | -1.346811 |
| 115 | 6  | 0 | -6.634468  | -0.836446 | -1.347888 |
| 116 | 1  | 0 | -6.566125  | -1.806354 | -1.813633 |
| 117 | 7  | 0 | -6.363228  | 1.210255  | -0.556719 |
| 118 | 7  | 0 | -7.489983  | 0.775136  | -0.083224 |
| 119 | 7  | 0 | -7.671286  | -0.468259 | -0.559464 |
| 120 | 6  | 0 | -8.822449  | -1.222232 | -0.203901 |
| 121 | 6  | 0 | -9.319031  | -2.173289 | -1.089554 |
| 122 | 6  | 0 | -9.427202  | -1.002698 | 1.030187  |
| 123 | 6  | 0 | -10.428274 | -2.928906 | -0.732265 |
| 124 | 1  | 0 | -8.858832  | -2.318868 | -2.060662 |
| 125 | 6  | 0 | -10.545708 | -1.746849 | 1.381195  |
| 126 | 1  | 0 | -9.025081  | -0.257418 | 1.705991  |
| 127 | 6  | 0 | -11.032241 | -2.706485 | 0.499609  |
| 128 | 1  | 0 | -10.824118 | -3.673414 | -1.412875 |
| 129 | 1  | 0 | -11.028530 | -1.586600 | 2.337930  |
| 130 | 17 | 0 | -12.433395 | -3.650906 | 0.947620  |
| 131 | 6  | 0 | -1.058944  | -2.058904 | 1.923196  |
| 132 | 6  | 0 | -0.913679  | -1.438140 | 3.143255  |
| 133 | 1  | 0 | -1.545735  | -1.386463 | 4.015734  |
| 134 | 7  | 0 | 0.031730   | -1.757949 | 1.174903  |
| 135 | 7  | 0 | 0.825853   | -0.998260 | 1.865606  |
| 136 | 7  | 0 | 0.268018   | -0.792758 | 3.068954  |
| 137 | 6  | 0 | 0.874941   | 0.026751  | 4.063367  |
| 138 | 6  | 0 | 1.014230   | -0.473781 | 5.353645  |
| 139 | 6  | 0 | 1.305718   | 1.303887  | 3.729556  |
| 140 | 6  | 0 | 1.597327   | 0.319944  | 6.332001  |
| 141 | 1  | 0 | 0.693587   | -1.483841 | 5.585357  |
| 142 | 6  | 0 | 1.902937   | 2.093372  | 4.702972  |
| 143 | 1  | 0 | 1.195947   | 1.675864  | 2.717023  |
| 144 | 6  | 0 | 2.041262   | 1.594157  | 5.993045  |

|     |    |   |           |           |           |
|-----|----|---|-----------|-----------|-----------|
| 145 | 1  | 0 | 1.724888  | -0.056842 | 7.339689  |
| 146 | 1  | 0 | 2.261266  | 3.085432  | 4.454094  |
| 147 | 17 | 0 | 2.794105  | 2.587126  | 7.216145  |
| 148 | 6  | 0 | 1.060329  | 0.816393  | -0.807670 |
| 149 | 6  | 0 | -0.277324 | 1.004913  | -0.574017 |
| 150 | 1  | 0 | -1.161974 | 0.503352  | -0.936809 |
| 151 | 7  | 0 | 1.728980  | 1.747586  | -0.079014 |
| 152 | 7  | 0 | 0.894147  | 2.491598  | 0.583172  |
| 153 | 7  | 0 | -0.328169 | 2.051381  | 0.288934  |
| 154 | 6  | 0 | -1.467508 | 2.721513  | 0.810817  |
| 155 | 6  | 0 | -2.691729 | 2.554921  | 0.174833  |
| 156 | 6  | 0 | -1.342120 | 3.557880  | 1.915345  |
| 157 | 6  | 0 | -3.816479 | 3.219208  | 0.645114  |
| 158 | 1  | 0 | -2.759375 | 1.944492  | -0.714786 |
| 159 | 6  | 0 | -2.460604 | 4.243433  | 2.373947  |
| 160 | 1  | 0 | -0.383942 | 3.682571  | 2.404818  |
| 161 | 6  | 0 | -3.685408 | 4.068174  | 1.737731  |
| 162 | 1  | 0 | -4.778620 | 3.067324  | 0.165591  |
| 163 | 1  | 0 | -2.378470 | 4.904668  | 3.228777  |
| 164 | 17 | 0 | -5.085894 | 4.929151  | 2.323116  |
| 165 | 30 | 0 | 3.717739  | 2.536664  | -0.815272 |
| 166 | 6  | 0 | 3.977221  | 3.951459  | 0.916477  |
| 167 | 1  | 0 | 3.807493  | 2.875582  | 1.139117  |
| 168 | 6  | 0 | 5.095264  | 1.653066  | -1.950334 |
| 169 | 1  | 0 | 4.755444  | 1.926747  | -2.962153 |
| 170 | 6  | 0 | 5.292301  | 0.133627  | -1.938728 |
| 171 | 1  | 0 | 6.097333  | -0.157103 | -2.631974 |
| 172 | 1  | 0 | 5.582999  | -0.227750 | -0.947752 |
| 173 | 1  | 0 | 4.400087  | -0.429599 | -2.229706 |
| 174 | 6  | 0 | 6.461950  | 2.325166  | -1.755323 |
| 175 | 1  | 0 | 7.179836  | 1.998826  | -2.524657 |
| 176 | 1  | 0 | 6.384523  | 3.414580  | -1.797390 |
| 177 | 1  | 0 | 6.906811  | 2.054293  | -0.788404 |
| 178 | 6  | 0 | 3.005985  | 4.671898  | 1.840128  |
| 179 | 1  | 0 | 3.205603  | 4.440923  | 2.897119  |
| 180 | 1  | 0 | 3.101491  | 5.763377  | 1.747442  |
| 181 | 1  | 0 | 1.966766  | 4.408489  | 1.625436  |
| 182 | 6  | 0 | 5.429691  | 4.229582  | 1.275113  |
| 183 | 1  | 0 | 5.657539  | 5.298785  | 1.181910  |

|     |    |   |           |          |           |
|-----|----|---|-----------|----------|-----------|
| 184 | 1  | 0 | 5.661512  | 3.936120 | 2.308815  |
| 185 | 1  | 0 | 6.121228  | 3.700383 | 0.614858  |
| 186 | 8  | 0 | 4.753393  | 5.001432 | -1.653333 |
| 187 | 6  | 0 | 3.840366  | 5.172958 | -0.815036 |
| 188 | 1  | 0 | 3.885420  | 6.013336 | -0.096432 |
| 189 | 6  | 0 | 2.429924  | 4.907429 | -1.282002 |
| 190 | 6  | 0 | 1.228530  | 5.562686 | -1.215124 |
| 191 | 7  | 0 | 2.210493  | 3.736308 | -1.930285 |
| 192 | 1  | 0 | 0.943756  | 6.522902 | -0.818411 |
| 193 | 7  | 0 | 0.963081  | 3.614957 | -2.255360 |
| 194 | 7  | 0 | 0.349245  | 4.725367 | -1.835969 |
| 195 | 6  | 0 | -1.052106 | 4.859597 | -2.022518 |
| 196 | 6  | 0 | -1.674598 | 4.137073 | -3.038293 |
| 197 | 6  | 0 | -1.789881 | 5.680309 | -1.175108 |
| 198 | 6  | 0 | -3.050060 | 4.234751 | -3.201560 |
| 199 | 1  | 0 | -1.084536 | 3.511082 | -3.696850 |
| 200 | 6  | 0 | -3.163207 | 5.792464 | -1.351123 |
| 201 | 1  | 0 | -1.309625 | 6.212811 | -0.362086 |
| 202 | 6  | 0 | -3.783541 | 5.063106 | -2.358709 |
| 203 | 1  | 0 | -3.544408 | 3.683537 | -3.993742 |
| 204 | 1  | 0 | -3.747559 | 6.426106 | -0.694418 |
| 205 | 17 | 0 | -5.514460 | 5.174658 | -2.560862 |

---

Sum of electronic and zero-point Energies = -15309.678231

Sum of electronic and thermal Energies = -15309.565027

Sum of electronic and thermal Enthalpies = -15309.564083

Sum of electronic and thermal Free Energies = -15309.836576

Standard orientation:

| Center<br>Number | Atomic<br>Number | Atomic<br>Type | Coordinates (Angstroms) |           |           |
|------------------|------------------|----------------|-------------------------|-----------|-----------|
|                  |                  |                | X                       | Y         | Z         |
| 1                | 30               | 0              | 2.908048                | -0.520500 | 1.488901  |
| 2                | 6                | 0              | 4.315861                | 0.598199  | 2.277024  |
| 3                | 6                | 0              | 5.445783                | 0.811120  | 1.264451  |
| 4                | 6                | 0              | -2.258512               | -2.439574 | 1.687127  |
| 5                | 8                | 0              | -2.757663               | -1.765682 | 0.566441  |
| 6                | 30               | 0              | -3.900484               | -0.143189 | 0.712908  |
| 7                | 6                | 0              | -4.976730               | -0.129039 | 2.340094  |
| 8                | 6                | 0              | -5.803388               | 1.099675  | 2.704350  |
| 9                | 8                | 0              | 2.362121                | -0.776740 | -0.437460 |
| 10               | 30               | 0              | 2.614791                | -2.676489 | -0.557382 |
| 11               | 8                | 0              | 3.056106                | -2.521721 | 1.332278  |
| 12               | 6                | 0              | 4.046937                | -3.271558 | 1.981840  |
| 13               | 6                | 0              | 1.795340                | 0.159465  | -1.311877 |
| 14               | 6                | 0              | 1.222018                | -0.505161 | -2.571649 |
| 15               | 6                | 0              | 0.176799                | -1.578698 | -2.270010 |
| 16               | 6                | 0              | 0.711012                | 0.517799  | -3.585357 |
| 17               | 6                | 0              | 2.834154                | -4.165180 | -1.804912 |
| 18               | 6                | 0              | 1.733341                | -5.222819 | -1.677735 |
| 19               | 6                | 0              | 3.694194                | -4.773259 | 1.951639  |
| 20               | 6                | 0              | 4.766961                | -5.629255 | 2.623114  |
| 21               | 6                | 0              | 2.326382                | -4.990661 | 2.597064  |
| 22               | 6                | 0              | 4.888092                | 0.072870  | 3.597238  |
| 23               | 6                | 0              | -1.982147               | -3.928659 | 1.398505  |
| 24               | 6                | 0              | -1.628855               | -4.682072 | 2.680602  |
| 25               | 6                | 0              | -0.922061               | -4.153701 | 0.322301  |
| 26               | 30               | 0              | -3.067186               | -2.142266 | -1.292922 |
| 27               | 8                | 0              | -3.614301               | -0.216499 | -1.217039 |



|    |   |   |           |           |           |
|----|---|---|-----------|-----------|-----------|
| 28 | 6 | 0 | -4.546350 | 0.359320  | -2.115323 |
| 29 | 6 | 0 | -3.370536 | -3.710793 | -2.417972 |
| 30 | 6 | 0 | -2.650794 | -3.731210 | -3.767623 |
| 31 | 6 | 0 | -4.864310 | -4.000181 | -2.610354 |
| 32 | 6 | 0 | -5.873588 | -1.370637 | 2.230881  |
| 33 | 6 | 0 | -4.344092 | -0.174436 | -3.540227 |
| 34 | 6 | 0 | -2.896226 | 0.043637  | -3.976057 |
| 35 | 6 | 0 | -5.316853 | 0.477204  | -4.521858 |
| 36 | 1 | 0 | 2.585650  | 0.847117  | -1.655703 |
| 37 | 1 | 0 | 2.083776  | -1.011408 | -3.027663 |
| 38 | 1 | 0 | 0.460593  | 0.025716  | -4.530526 |
| 39 | 1 | 0 | 1.464891  | 1.284291  | -3.786722 |
| 40 | 1 | 0 | -0.187336 | 1.027725  | -3.224557 |
| 41 | 1 | 0 | -0.685238 | -1.178034 | -1.725561 |
| 42 | 1 | 0 | -0.180140 | -2.034223 | -3.197967 |
| 43 | 1 | 0 | 0.594173  | -2.373960 | -1.651274 |
| 44 | 1 | 0 | 3.776734  | -4.653081 | -1.509902 |
| 45 | 1 | 0 | 1.642381  | -5.611046 | -0.656191 |
| 46 | 1 | 0 | 1.917430  | -6.083974 | -2.338210 |
| 47 | 1 | 0 | 0.752487  | -4.816739 | -1.957685 |
| 48 | 1 | 0 | 4.103656  | -2.966553 | 3.039305  |
| 49 | 1 | 0 | 3.631239  | -5.058443 | 0.890967  |
| 50 | 1 | 0 | 1.972224  | -6.016348 | 2.451282  |
| 51 | 1 | 0 | 1.591078  | -4.303126 | 2.173862  |
| 52 | 1 | 0 | 2.377870  | -4.804272 | 3.677434  |
| 53 | 1 | 0 | 5.734636  | -5.540514 | 2.121471  |
| 54 | 1 | 0 | 4.478783  | -6.685470 | 2.615093  |
| 55 | 1 | 0 | 4.910078  | -5.329405 | 3.667823  |
| 56 | 1 | 0 | 3.875605  | 1.581917  | 2.486474  |
| 57 | 1 | 0 | 5.621081  | 0.770827  | 4.033968  |
| 58 | 1 | 0 | 5.413150  | -0.879994 | 3.460032  |
| 59 | 1 | 0 | 4.111190  | -0.090429 | 4.354814  |
| 60 | 1 | 0 | 5.090111  | 1.273146  | 0.335053  |
| 61 | 1 | 0 | 6.243240  | 1.461245  | 1.656439  |
| 62 | 1 | 0 | 5.919424  | -0.138964 | 0.987611  |
| 63 | 1 | 0 | -1.116186 | -3.542336 | -0.561530 |
| 64 | 1 | 0 | 0.076650  | -3.898523 | 0.686041  |
| 65 | 1 | 0 | -0.910912 | -5.201491 | 0.009242  |
| 66 | 1 | 0 | -2.938052 | -4.320506 | 1.021743  |

|     |   |   |           |           |           |
|-----|---|---|-----------|-----------|-----------|
| 67  | 1 | 0 | -0.690544 | -4.313644 | 3.110124  |
| 68  | 1 | 0 | -1.497756 | -5.748978 | 2.477510  |
| 69  | 1 | 0 | -2.412140 | -4.579809 | 3.439880  |
| 70  | 1 | 0 | -3.014614 | -2.412017 | 2.488485  |
| 71  | 1 | 0 | -5.024131 | -4.971571 | -3.100774 |
| 72  | 1 | 0 | -5.345735 | -3.251566 | -3.254361 |
| 73  | 1 | 0 | -5.411855 | -4.028385 | -1.659310 |
| 74  | 1 | 0 | -2.883056 | -4.646868 | -4.332064 |
| 75  | 1 | 0 | -2.938252 | -2.885437 | -4.405629 |
| 76  | 1 | 0 | -1.562219 | -3.697111 | -3.652958 |
| 77  | 1 | 0 | -2.964623 | -4.546604 | -1.829674 |
| 78  | 1 | 0 | -4.278249 | -0.310480 | 3.171781  |
| 79  | 1 | 0 | -6.637218 | -1.243692 | 1.453701  |
| 80  | 1 | 0 | -6.412825 | -1.569844 | 3.169007  |
| 81  | 1 | 0 | -5.311887 | -2.279761 | 1.979885  |
| 82  | 1 | 0 | -5.166486 | 1.950877  | 2.960125  |
| 83  | 1 | 0 | -6.447774 | 0.904182  | 3.576221  |
| 84  | 1 | 0 | -6.458670 | 1.416318  | 1.885236  |
| 85  | 1 | 0 | -4.388108 | 1.448701  | -2.153626 |
| 86  | 1 | 0 | -4.536770 | -1.256409 | -3.518725 |
| 87  | 1 | 0 | -5.176522 | 1.564065  | -4.549798 |
| 88  | 1 | 0 | -6.360095 | 0.285646  | -4.256169 |
| 89  | 1 | 0 | -5.154062 | 0.093871  | -5.533412 |
| 90  | 1 | 0 | -2.734217 | -0.303448 | -5.000545 |
| 91  | 1 | 0 | -2.638314 | 1.109341  | -3.937532 |
| 92  | 1 | 0 | -2.197499 | -0.489231 | -3.328651 |
| 93  | 6 | 0 | 2.984127  | -3.743154 | -3.269681 |
| 94  | 1 | 0 | 3.783787  | -3.006458 | -3.416748 |
| 95  | 1 | 0 | 3.207737  | -4.600912 | -3.922762 |
| 96  | 1 | 0 | 2.059960  | -3.291579 | -3.652491 |
| 97  | 6 | 0 | 5.400663  | -2.987898 | 1.385486  |
| 98  | 6 | 0 | 5.741723  | -2.812455 | 0.066928  |
| 99  | 1 | 0 | 5.175637  | -2.818467 | -0.849534 |
| 100 | 7 | 0 | 6.524428  | -2.802868 | 2.132137  |
| 101 | 7 | 0 | 7.525259  | -2.518186 | 1.353898  |
| 102 | 7 | 0 | 7.062791  | -2.519130 | 0.092338  |
| 103 | 6 | 0 | 7.893353  | -2.160969 | -0.999475 |
| 104 | 6 | 0 | 7.710589  | -2.781628 | -2.230695 |
| 105 | 6 | 0 | 8.835906  | -1.150508 | -0.836389 |

|     |    |   |            |           |           |
|-----|----|---|------------|-----------|-----------|
| 106 | 6  | 0 | 8.464513   | -2.373235 | -3.323208 |
| 107 | 1  | 0 | 6.979635   | -3.575586 | -2.340970 |
| 108 | 6  | 0 | 9.601994   | -0.751557 | -1.923746 |
| 109 | 1  | 0 | 8.949771   | -0.672221 | 0.129206  |
| 110 | 6  | 0 | 9.401781   | -1.360382 | -3.158068 |
| 111 | 1  | 0 | 8.325740   | -2.841961 | -4.290212 |
| 112 | 1  | 0 | 10.335181  | 0.038996  | -1.815351 |
| 113 | 17 | 0 | 10.347190  | -0.838562 | -4.535626 |
| 114 | 6  | 0 | -5.933556  | 0.160848  | -1.578692 |
| 115 | 6  | 0 | -6.719955  | -0.965910 | -1.533932 |
| 116 | 1  | 0 | -6.586315  | -1.967707 | -1.909616 |
| 117 | 7  | 0 | -6.585698  | 1.151498  | -0.909675 |
| 118 | 7  | 0 | -7.718068  | 0.703134  | -0.462429 |
| 119 | 7  | 0 | -7.814389  | -0.584450 | -0.834418 |
| 120 | 6  | 0 | -8.943836  | -1.363400 | -0.465459 |
| 121 | 6  | 0 | -9.405651  | -2.354783 | -1.325082 |
| 122 | 6  | 0 | -9.560629  | -1.126863 | 0.759450  |
| 123 | 6  | 0 | -10.493992 | -3.132643 | -0.950847 |
| 124 | 1  | 0 | -8.933895  | -2.512651 | -2.288780 |
| 125 | 6  | 0 | -10.658289 | -1.893617 | 1.127383  |
| 126 | 1  | 0 | -9.180832  | -0.352851 | 1.415926  |
| 127 | 6  | 0 | -11.110887 | -2.892363 | 0.271512  |
| 128 | 1  | 0 | -10.864851 | -3.907508 | -1.611338 |
| 129 | 1  | 0 | -11.149506 | -1.721869 | 2.077791  |
| 130 | 17 | 0 | -12.486005 | -3.865145 | 0.740935  |
| 131 | 6  | 0 | -1.060336  | -1.695368 | 2.214237  |
| 132 | 6  | 0 | -0.839760  | -1.149103 | 3.459695  |
| 133 | 1  | 0 | -1.430768  | -1.116042 | 4.361205  |
| 134 | 7  | 0 | 0.014817   | -1.411389 | 1.440711  |
| 135 | 7  | 0 | 0.868389   | -0.732915 | 2.138905  |
| 136 | 7  | 0 | 0.372373   | -0.561052 | 3.370731  |
| 137 | 6  | 0 | 1.100507   | 0.153684  | 4.366835  |
| 138 | 6  | 0 | 1.369852   | -0.468618 | 5.580738  |
| 139 | 6  | 0 | 1.535779   | 1.446161  | 4.096528  |
| 140 | 6  | 0 | 2.080355   | 0.220275  | 6.555300  |
| 141 | 1  | 0 | 1.042742   | -1.488053 | 5.755448  |
| 142 | 6  | 0 | 2.262076   | 2.127913  | 5.063801  |
| 143 | 1  | 0 | 1.318094   | 1.910366  | 3.140062  |
| 144 | 6  | 0 | 2.521041   | 1.511156  | 6.282946  |

|     |    |   |           |           |           |
|-----|----|---|-----------|-----------|-----------|
| 145 | 1  | 0 | 2.304136  | -0.248369 | 7.506148  |
| 146 | 1  | 0 | 2.625652  | 3.129404  | 4.867652  |
| 147 | 17 | 0 | 3.429314  | 2.374469  | 7.499526  |
| 148 | 6  | 0 | 0.840276  | 1.035224  | -0.541894 |
| 149 | 6  | 0 | -0.521128 | 1.209822  | -0.522311 |
| 150 | 1  | 0 | -1.338892 | 0.751812  | -1.058898 |
| 151 | 7  | 0 | 1.372181  | 1.859929  | 0.402140  |
| 152 | 7  | 0 | 0.432315  | 2.520103  | 0.997036  |
| 153 | 7  | 0 | -0.732759 | 2.137059  | 0.448350  |
| 154 | 6  | 0 | -1.942937 | 2.750390  | 0.855874  |
| 155 | 6  | 0 | -3.038209 | 2.739260  | -0.000977 |
| 156 | 6  | 0 | -2.013291 | 3.393427  | 2.090076  |
| 157 | 6  | 0 | -4.220335 | 3.370741  | 0.369028  |
| 158 | 1  | 0 | -2.957826 | 2.283857  | -0.979894 |
| 159 | 6  | 0 | -3.180006 | 4.056534  | 2.446359  |
| 160 | 1  | 0 | -1.157493 | 3.391545  | 2.754085  |
| 161 | 6  | 0 | -4.272072 | 4.042698  | 1.583019  |
| 162 | 1  | 0 | -5.085121 | 3.335345  | -0.284286 |
| 163 | 1  | 0 | -3.243397 | 4.571652  | 3.397887  |
| 164 | 17 | 0 | -5.733086 | 4.883485  | 2.037458  |
| 165 | 30 | 0 | 4.504062  | 2.560755  | -1.779049 |
| 166 | 6  | 0 | 3.814952  | 4.239395  | 1.362610  |
| 167 | 1  | 0 | 3.515864  | 3.187330  | 1.285976  |
| 168 | 6  | 0 | 4.959930  | 1.082819  | -2.968280 |
| 169 | 1  | 0 | 4.095408  | 0.939649  | -3.636179 |
| 170 | 6  | 0 | 5.221198  | -0.248383 | -2.262745 |
| 171 | 1  | 0 | 5.441956  | -1.050161 | -2.986448 |
| 172 | 1  | 0 | 6.091083  | -0.178602 | -1.599605 |
| 173 | 1  | 0 | 4.375309  | -0.568761 | -1.645982 |
| 174 | 6  | 0 | 6.160844  | 1.452831  | -3.848906 |
| 175 | 1  | 0 | 6.394700  | 0.659653  | -4.576563 |
| 176 | 1  | 0 | 5.995311  | 2.375563  | -4.417835 |
| 177 | 1  | 0 | 7.067562  | 1.602205  | -3.249270 |
| 178 | 6  | 0 | 2.727237  | 5.001885  | 2.120711  |
| 179 | 1  | 0 | 2.764228  | 4.757237  | 3.187900  |
| 180 | 1  | 0 | 2.871733  | 6.087617  | 2.040088  |
| 181 | 1  | 0 | 1.722541  | 4.752404  | 1.768560  |
| 182 | 6  | 0 | 5.148657  | 4.316162  | 2.100928  |
| 183 | 1  | 0 | 5.432192  | 5.360451  | 2.286581  |

|     |    |   |           |          |           |
|-----|----|---|-----------|----------|-----------|
| 184 | 1  | 0 | 5.089853  | 3.806966 | 3.068981  |
| 185 | 1  | 0 | 5.936107  | 3.848653 | 1.508100  |
| 186 | 8  | 0 | 5.001262  | 4.010873 | -0.736741 |
| 187 | 6  | 0 | 4.010434  | 4.728541 | -0.097668 |
| 188 | 1  | 0 | 4.276709  | 5.801509 | -0.052089 |
| 189 | 6  | 0 | 2.712788  | 4.606911 | -0.875210 |
| 190 | 6  | 0 | 1.478109  | 5.202411 | -0.834449 |
| 191 | 7  | 0 | 2.639318  | 3.632517 | -1.816241 |
| 192 | 1  | 0 | 1.093263  | 6.018019 | -0.247264 |
| 193 | 7  | 0 | 1.455660  | 3.574905 | -2.342651 |
| 194 | 7  | 0 | 0.731960  | 4.523676 | -1.747903 |
| 195 | 6  | 0 | -0.640374 | 4.679149 | -2.089864 |
| 196 | 6  | 0 | -1.151630 | 3.977374 | -3.180267 |
| 197 | 6  | 0 | -1.461905 | 5.505569 | -1.329541 |
| 198 | 6  | 0 | -2.495775 | 4.101498 | -3.504963 |
| 199 | 1  | 0 | -0.499737 | 3.345771 | -3.770596 |
| 200 | 6  | 0 | -2.804389 | 5.638780 | -1.662122 |
| 201 | 1  | 0 | -1.080529 | 6.032670 | -0.463481 |
| 202 | 6  | 0 | -3.312978 | 4.929414 | -2.742241 |
| 203 | 1  | 0 | -2.899874 | 3.567432 | -4.357350 |
| 204 | 1  | 0 | -3.450767 | 6.272362 | -1.066584 |
| 205 | 17 | 0 | -5.009829 | 5.058482 | -3.136848 |

---
